# Supplementary material for: What doesn’t break rock makes it tougher
Source: Research Square preprint supplement (doi:10.21203/rs.3.rs-3198792/v1), 2023-10-23
Supplement: Supplementary file 1 [file 1ef38dd5dca66d5d618c2bc6.pdf]

| 1 surface ID<br>2 | surface   | Surface<br>age<br>(ka) | # from<br>clast<br>count | length<br>(cm) | width<br>(cm) | height<br>(cm) | Rocktype     |
|-------------------|-----------|------------------------|--------------------------|----------------|---------------|----------------|--------------|
| 3                 | ShC-MW-T6 | MW                     | 0.1                      | 1              | 7.1           | 6.2            | 2.7 granite  |
| 4                 | ShC-MW-T6 | MW                     | 0.1                      | 2              | 1.0           | 0.6            | 0.7 granite  |
| 5                 | ShC-MW-T6 | MW                     | 0.1                      | 3              | 14.5          | 10.3           | 9.5 granite  |
| 6                 | ShC-MW-T6 | MW                     | 0.1                      | 4              | 14.7          | 12.0           | 11.8 granite |
| 7                 | ShC-MW-T6 | MW                     | 0.1                      | 5              | 4.8           | 3.6            | 1.5 granite  |
| 8                 | ShC-MW-T6 | MW                     | 0.1                      | 6              | 31.9          | 24.0           | 15.0 granite |
| 9                 | ShC-MW-T6 | MW                     | 0.1                      | 7              | 17.0          | 12.5           | 16.1 granite |
| 10                | ShC-MW-T6 | MW                     | 0.1                      | 8              | 9.8           | 7.0            | 4.5 granite  |
| 11                | ShC-MW-T6 | MW                     | 0.1                      | 9              | 1.2           | 1.0            | 7.0 granite  |
| 12                | ShC-MW-T6 | MW                     | 0.1                      | 10             | 3.5           | 2.9            | 2.0 granite  |
| 13                | ShC-MW-T6 | MW                     | 0.1                      | 11             | 8.5           | 6.7            | 5.6 granite  |
| 14                | ShC-MW-T6 | MW                     | 0.1                      | 12             | 13.2          | 8.5            | 6.6 granite  |
| 15                | ShC-MW-T6 | MW                     | 0.1                      | 13             | 2.9           | 2.7            | 1.6 granite  |
| 16                | ShC-MW-T6 | MW                     | 0.1                      | 14             | 21.0          | 9.3            | 7.1 granite  |
| 17                | ShC-MW-T6 | MW                     | 0.1                      | 15             | 12.2          | 6.8            | 6.1 granite  |
| 18                | ShC-MW-T6 | MW                     | 0.1                      | 16             | 12.9          | 7.2            | 5.8 granite  |
| 19                | ShC-MW-T6 | MW                     | 0.1                      | 17             | 1.2           | 0.9            | 0.5 granite  |
| 20                | ShC-MW-T6 | MW                     | 0.1                      | 18             | 10.8          | 9.0            | 6.2 granite  |
| 21                | ShC-MW-T6 | MW                     | 0.1                      | 19             | 3.3           | 1.9            | 1.2 granite  |
| 22                | ShC-MW-T6 | MW                     | 0.1                      | 20             | 2.7           | 1.2            | 0.7 granite  |
| 23                | ShC-MW-T6 | MW                     | 0.1                      | 21             | 9.6           | 8.8            | 5.8 granite  |
| 24                | ShC-MW-T6 | MW                     | 0.1                      | 22             | 6.0           | 5.5            | 5.5 granite  |
| 25                | ShC-MW-T6 | MW                     | 0.1                      | 23             | 1.3           | 0.9            | 0.6 granite  |
| 26                | ShC-MW-T7 | MW                     | 0.1                      | 24             | 9.9           | 7.1            | 5.7 granite  |
| 27                | ShC-MW-T7 | MW                     | 0.1                      | 25             | 13.0          | 10.5           | 6.8 granite  |
| 28                | ShC-MW-T7 | MW                     | 0.1                      | 26             | 2.1           | 1.1            | 0.5 granite  |
| 29                | ShC-MW-T7 | MW                     | 0.1                      | 27             | 4.5           | 3.0            | 1.7 granite  |
| 30                | ShC-MW-T7 | MW                     | 0.1                      | 28             | 1.5           | 1.1            | 0.6 granite  |
| 31                | ShC-MW-T7 | MW                     | 0.1                      | 29             | 2.5           | 2.0            | 1.1 granite  |
| 32                | ShC-MW-T7 | MW                     | 0.1                      | 30             | 17.9          | 11.6           | 6.3 granite  |
| 33                | ShC-MW-T7 | MW                     | 0.1                      | 31             | 30.2          | 17.2           | 15.0 granite |
| 34                | ShC-MW-T7 | MW                     | 0.1                      | 32             | 11.5          | 7.8            | 4.1 granite  |
| 35                | ShC-MW-T7 | MW                     | 0.1                      | 33             | 5.6           | 4.1            | 2.7 granite  |
| 36                | ShC-MW-T7 | MW                     | 0.1                      | 34             | 14.8          | 10.1           | 7.7 granite  |
| 37                | ShC-MW-T7 | MW                     | 0.1                      | 35             | 18.5          | 10.0           | 12.8 granite |
| 38                | ShC-MW-T7 | MW                     | 0.1                      | 36             | 2.6           | 1.9            | 0.8 granite  |
| 39                | ShC-MW-T7 | MW                     | 0.1                      | 37             | 2.3           | 1.6            | 1.6 granite  |
| 40                | ShC-MW-T7 | MW                     | 0.1                      | 38             | 8.4           | 4.6            | 4.0 granite  |
| 41                | ShC-MW-T7 | MW                     | 0.1                      | 39             | 7.5           | 5.5            | 4.6 granite  |
| 42                | ShC-MW-T7 | MW                     | 0.1                      | 40             | 1.9           | 1.0            | 0.9 granite  |
| 43                | ShC-MW-T7 | MW                     | 0.1                      | 41             | 2.8           | 2.4            | 1.4 granite  |
| 44                | ShC-MW-T7 | MW                     | 0.1                      | 42             | 1.2           | 0.8            | 0.7 granite  |

|    |           |    |     |    |      |      |              |
|----|-----------|----|-----|----|------|------|--------------|
| 45 | ShC-MW-T7 | MW | 0.1 | 43 | 2.5  | 1.4  | 1.2 granite  |
| 46 | ShC-MW-T7 | MW | 0.1 | 44 | 2.6  | 1.8  | 1.6 granite  |
| 47 | ShC-MW-T7 | MW | 0.1 | 45 | 1.2  | 0.8  | 0.7 granite  |
| 48 | ShC-MW-T7 | MW | 0.1 | 46 | 7.7  | 6.3  | 5.5 granite  |
| 49 | ShC-MW-T7 | MW | 0.1 | 47 | 8.0  | 5.5  | 4.0 granite  |
| 50 | ShC-MW-T7 | MW | 0.1 | 48 | 4.7  | 3.4  | 3.7 granite  |
| 51 | ShC-MW-T7 | MW | 0.1 | 49 | 8.2  | 7.0  | 6.0 granite  |
| 52 | ShC-MW-T7 | MW | 0.1 | 50 | 1.7  | 1.4  | 1.0 granite  |
| 53 | ShC-MW-T7 | MW | 0.1 | 51 | 8.1  | 8.1  | 4.2 granite  |
| 54 | ShC-MW-T7 | MW | 0.1 | 52 | 2.2  | 1.9  | 1.3 granite  |
| 55 | ShC-MW-T7 | MW | 0.1 | 53 | 2.0  | 1.6  | 0.7 granite  |
| 56 | ShC-MW-T7 | MW | 0.1 | 54 | 9.2  | 6.9  | 4.3 granite  |
| 57 | ShC-MW-T7 | MW | 0.1 | 55 | 14.0 | 10.5 | 8.5 granite  |
| 58 | ShC-MW-T7 | MW | 0.1 | 56 | 9.8  | 8.4  | 6.7 granite  |
| 59 | ShC-MW-T7 | MW | 0.1 | 57 | 4.1  | 2.8  | 2.4 granite  |
| 60 | ShC-MW-T7 | MW | 0.1 | 58 | 4.8  | 4.5  | 1.9 granite  |
| 61 | ShC-MW-T7 | MW | 0.1 | 59 | 16.8 | 13.0 | 4.5 granite  |
| 62 | ShC-MW-T7 | MW | 0.1 | 60 | 2.2  | 1.8  | 1.0 granite  |
| 63 | ShC-MW-T7 | MW | 0.1 | 61 | 12.7 | 8.8  | 7.0 granite  |
| 64 | ShC-MW-T7 | MW | 0.1 | 62 | 6.3  | 4.9  | 4.3 granite  |
| 65 | ShC-MW-T7 | MW | 0.1 | 63 | 32.0 | 23.0 | 25.0 granite |
| 66 | ShC-MW-T7 | MW | 0.1 | 64 | 3.4  | 2.1  | 1.2 granite  |
| 67 | ShC-MW-T7 | MW | 0.1 | 65 | 14.3 | 12.5 | 5.5 granite  |
| 68 | ShC-MW-T7 | MW | 0.1 | 66 | 2.4  | 2.3  | 1.4 granite  |
| 69 | ShC-MW-T7 | MW | 0.1 | 67 | 59.0 | 33.0 | 33.0 granite |
| 70 | ShC-MW-T7 | MW | 0.1 | 68 | 33.0 | 24.0 | 29.0 granite |
| 71 | ShC-MW-T7 | MW | 0.1 | 69 | 3.6  | 2.8  | 2.0 granite  |
| 72 | ShC-MW-T7 | MW | 0.1 | 70 | 15.0 | 15.0 | 8.0 granite  |
| 73 | ShC-MW-T7 | MW | 0.1 | 71 | 11.0 | 9.5  | 8.0 granite  |
| 74 | ShC-MW-T7 | MW | 0.1 | 72 | 10.5 | 7.0  | 3.0 granite  |
| 75 | ShC-MW-T8 | MW | 0.1 | 73 | 6.1  | 5.3  | 3.0 granite  |
| 76 | ShC-MW-T8 | MW | 0.1 | 74 | 14.5 | 11.0 | 7.0 granite  |
| 77 | ShC-MW-T8 | MW | 0.1 | 75 | 8.0  | 5.5  | 4.1 granite  |
| 78 | ShC-MW-T8 | MW | 0.1 | 76 | 1.1  | 1.1  | 0.6 granite  |
| 79 | ShC-MW-T8 | MW | 0.1 | 77 | 5.3  | 3.5  | 2.5 granite  |
| 80 | ShC-MW-T8 | MW | 0.1 | 78 | 12.0 | 7.5  | 8.0 granite  |
| 81 | ShC-MW-T8 | MW | 0.1 | 79 | 22.0 | 18.5 | 15.0 granite |
| 82 | ShC-MW-T8 | MW | 0.1 | 80 | 8.9  | 5.1  | 3.8 granite  |
| 83 | ShC-MW-T8 | MW | 0.1 | 81 | 8.5  | 6.3  | 4.9 granite  |
| 84 | ShC-MW-T8 | MW | 0.1 | 82 | 42.0 | 19.0 | 22.0 granite |
| 85 | ShC-MW-T8 | MW | 0.1 | 83 | 4.1  | 2.9  | 2.6 granite  |
| 86 | ShC-MW-T8 | MW | 0.1 | 84 | 14.2 | 12.0 | 5.0 granite  |
| 87 | ShC-MW-T8 | MW | 0.1 | 85 | 20.5 | 18.0 | 10.5 granite |
| 88 | ShC-MW-T8 | MW | 0.1 | 86 | 11.0 | 7.0  | 6.0 granite  |
| 89 | ShC-MW-T8 | MW | 0.1 | 87 | 13.8 | 10.5 | 5.7 granite  |
| 90 | ShC-MW-T8 | MW | 0.1 | 88 | 3.6  | 2.1  | 1.6 granite  |
| 91 | ShC-MW-T8 | MW | 0.1 | 89 | 15.4 | 11.5 | 8.0 granite  |

|     |           |    |     |     |      |      |              |
|-----|-----------|----|-----|-----|------|------|--------------|
| 92  | ShC-MW-T9 | MW | 0.1 | 90  | 1.2  | 0.9  | 0.8 granite  |
| 93  | ShC-MW-T9 | MW | 0.1 | 91  | 1.6  | 1.4  | 0.6 granite  |
| 94  | ShC-MW-T9 | MW | 0.1 | 92  | 3.4  | 3.1  | 1.8 granite  |
| 95  | ShC-MW-T9 | MW | 0.1 | 93  | 1.8  | 1.5  | 1.3 granite  |
| 96  | ShC-MW-T9 | MW | 0.1 | 94  | 3.8  | 3.5  | 1.4 granite  |
| 97  | ShC-MW-T9 | MW | 0.1 | 95  | 14.0 | 13.0 | 5.0 granite  |
| 98  | ShC-MW-T9 | MW | 0.1 | 96  | 15.4 | 8.5  | 7.0 granite  |
| 99  | ShC-MW-T9 | MW | 0.1 | 97  | 5.2  | 4.3  | 2.3 granite  |
| 100 | ShC-MW-T9 | MW | 0.1 | 98  | 7.7  | 5.1  | 3.9 granite  |
| 101 | ShC-MW-T9 | MW | 0.1 | 99  | 3.5  | 2.2  | 1.5 granite  |
| 102 | ShC-MW-T9 | MW | 0.1 | 100 | 64.0 | 34.0 | 28.0 granite |
| 103 | ShC-Q4-T7 | Q4 | 6.2 | 1   | 87.0 | 61.0 | 18.0 granite |
| 104 | ShC-Q4-T7 | Q4 | 6.2 | 2   | 43.0 | 35.0 | 12.5 granite |
| 105 | ShC-Q4-T7 | Q4 | 6.2 | 3   | 49.0 | 21.0 | 15.0 granite |
| 106 | ShC-Q4-T7 | Q4 | 6.2 | 4   | 1.2  | 0.9  | 0.7 granite  |
| 107 | ShC-Q4-T7 | Q4 | 6.2 | 5   | 1.5  | 1.2  | 0.6 granite  |
| 108 | ShC-Q4-T7 | Q4 | 6.2 | 6   | 54.0 | 33.0 | 20.0 granite |
| 109 | ShC-Q4-T7 | Q4 | 6.2 | 7   | 2.3  | 1.2  | 0.8 granite  |
| 110 | ShC-Q4-T7 | Q4 | 6.2 | 8   | 44.0 | 14.0 | 7.0 granite  |
| 111 | ShC-Q4-T7 | Q4 | 6.2 | 9   | 1.1  | 0.8  | 0.6 granite  |
| 112 | ShC-Q4-T7 | Q4 | 6.2 | 10  | 1.1  | 1.0  | 0.5 granite  |
| 113 | ShC-Q4-T7 | Q4 | 6.2 | 11  | 2.6  | 2.1  | 1.2 granite  |
| 114 | ShC-Q4-T7 | Q4 | 6.2 | 12  | 2.8  | 1.6  | 1.5 granite  |
| 115 | ShC-Q4-T7 | Q4 | 6.2 | 13  | 1.1  | 0.8  | 0.5 granite  |
| 116 | ShC-Q4-T7 | Q4 | 6.2 | 14  | 1.2  | 0.9  | 0.8 granite  |
| 117 | ShC-Q4-T7 | Q4 | 6.2 | 15  | 1.4  | 1.2  | 1.1 granite  |
| 118 | ShC-Q4-T7 | Q4 | 6.2 | 16  | 2.1  | 1.5  | 1.0 granite  |
| 119 | ShC-Q4-T7 | Q4 | 6.2 | 17  | 4.2  | 3.8  | 2.2 granite  |
| 120 | ShC-Q4-T7 | Q4 | 6.2 | 18  | 7.1  | 4.8  | 2.7 granite  |
| 121 | ShC-Q4-T7 | Q4 | 6.2 | 19  | 1.1  | 1.1  | 0.9 granite  |
| 122 | ShC-Q4-T7 | Q4 | 6.2 | 20  | 1.5  | 1.2  | 0.9 granite  |
| 123 | ShC-Q4-T7 | Q4 | 6.2 | 21  | 2.3  | 1.7  | 1.0 granite  |
| 124 | ShC-Q4-T7 | Q4 | 6.2 | 22  | 1.1  | 1.0  | 0.8 granite  |
| 125 | ShC-Q4-T7 | Q4 | 6.2 | 23  | 1.8  | 1.5  | 1.4 granite  |
| 126 | ShC-Q4-T7 | Q4 | 6.2 | 24  | 1.8  | 1.8  | 0.5 granite  |
| 127 | ShC-Q4-T7 | Q4 | 6.2 | 25  | 99.0 | 82.0 | 22.5 granite |
| 128 | ShC-Q4-T7 | Q4 | 6.2 | 26  | 70.0 | 26.0 | 10.0 granite |
| 129 | ShC-Q4-T7 | Q4 | 6.2 | 27  | 27.0 | 33.0 | 21.0 granite |
| 130 | ShC-Q4-T7 | Q4 | 6.2 | 28  | 1.5  | 1.2  | 1.0 granite  |
| 131 | ShC-Q4-T7 | Q4 | 6.2 | 29  | 31.0 | 19.0 | 19.0 granite |
| 132 | ShC-Q4-T7 | Q4 | 6.2 | 30  | 1.0  | 0.9  | 0.5 granite  |
| 133 | ShC-Q4-T7 | Q4 | 6.2 | 31  | 1.9  | 1.5  | 1.0 granite  |
| 134 | ShC-Q4-T7 | Q4 | 6.2 | 32  | 1.3  | 1.2  | 1.1 granite  |
| 135 | ShC-Q4-T7 | Q4 | 6.2 | 33  | 1.6  | 1.1  | 1.1 granite  |
| 136 | ShC-Q4-T7 | Q4 | 6.2 | 34  | 1.9  | 1.4  | 0.2 granite  |
| 137 | ShC-Q4-T7 | Q4 | 6.2 | 35  | 1.4  | 1.1  | 0.8 granite  |
| 138 | ShC-Q4-T7 | Q4 | 6.2 | 36  | 1.5  | 1.1  | 0.5 granite  |

|     |           |    |     |    |       |      |              |
|-----|-----------|----|-----|----|-------|------|--------------|
| 139 | ShC-Q4-T7 | Q4 | 6.2 | 37 | 28.0  | 19.0 | 15.0 granite |
| 140 | ShC-Q4-T7 | Q4 | 6.2 | 38 | 2.8   | 1.6  | 1.5 granite  |
| 141 | ShC-Q4-T7 | Q4 | 6.2 | 39 | 4.5   | 3.5  | 2.4 granite  |
| 142 | ShC-Q4-T7 | Q4 | 6.2 | 40 | 1.3   | 0.9  | 0.5 granite  |
| 143 | ShC-Q4-T7 | Q4 | 6.2 | 41 | 1.6   | 0.9  | 0.5 granite  |
| 144 | ShC-Q4-T7 | Q4 | 6.2 | 42 | 1.4   | 1.1  | 0.6 granite  |
| 145 | ShC-Q4-T7 | Q4 | 6.2 | 43 | 2.5   | 2.3  | 2.3 granite  |
| 146 | ShC-Q4-T7 | Q4 | 6.2 | 44 | 3.2   | 2.0  | 1.2 granite  |
| 147 | ShC-Q4-T7 | Q4 | 6.2 | 45 | 54.0  | 49.0 | 23.0 granite |
| 148 | ShC-Q4-T7 | Q4 | 6.2 | 46 | 2.0   | 1.5  | 1.0 granite  |
| 149 | ShC-Q4-T7 | Q4 | 6.2 | 47 | 2.0   | 1.2  | 1.0 granite  |
| 150 | ShC-Q4-T7 | Q4 | 6.2 | 48 | 45.0  | 42.0 | 11.0 granite |
| 151 | ShC-Q4-T7 | Q4 | 6.2 | 49 | 49.0  | 43.0 | 11.0 granite |
| 152 | ShC-Q4-T7 | Q4 | 6.2 | 50 | 1.1   | 1.1  | 0.7 granite  |
| 153 | ShC-Q4-T7 | Q4 | 6.2 | 51 | 1.5   | 1.1  | 0.8 granite  |
| 154 | ShC-Q4-T7 | Q4 | 6.2 | 52 | 3.1   | 2.9  | 1.6 granite  |
| 155 | ShC-Q4-T7 | Q4 | 6.2 | 53 | 2.7   | 2.0  | 1.2 granite  |
| 156 | ShC-Q4-T7 | Q4 | 6.2 | 54 | 1.5   | 1.0  | 0.6 granite  |
| 157 | ShC-Q4-T7 | Q4 | 6.2 | 55 | 22.0  | 19.0 | 5.0 granite  |
| 158 | ShC-Q4-T7 | Q4 | 6.2 | 56 | 1.8   | 1.2  | 1.1 granite  |
| 159 | ShC-Q4-T7 | Q4 | 6.2 | 57 | 1.8   | 1.4  | 0.9 granite  |
| 160 | ShC-Q4-T7 | Q4 | 6.2 | 58 | 1.8   | 0.8  | 0.5 granite  |
| 161 | ShC-Q4-T7 | Q4 | 6.2 | 59 | 2.0   | 1.8  | 0.9 granite  |
| 162 | ShC-Q4-T7 | Q4 | 6.2 | 60 | 1.1   | 1.0  | 0.7 granite  |
| 163 | ShC-Q4-T7 | Q4 | 6.2 | 61 | 51.0  | 32.0 | 15.0 granite |
| 164 | ShC-Q4-T7 | Q4 | 6.2 | 62 | 66.0  | 57.0 | 15.0 granite |
| 165 | ShC-Q4-T7 | Q4 | 6.2 | 63 | 3.0   | 1.8  | 1.5 granite  |
| 166 | ShC-Q4-T7 | Q4 | 6.2 | 64 | 101.0 | 61.0 | 17.0 granite |
| 167 | ShC-Q4-T7 | Q4 | 6.2 | 65 | 1.1   | 0.6  | 0.5 granite  |
| 168 | ShC-Q4-T7 | Q4 | 6.2 | 66 | 57.0  | 16.0 | 16.0 granite |
| 169 | ShC-Q4-T7 | Q4 | 6.2 | 67 | 1.2   | 1.0  | 0.5 granite  |
| 170 | ShC-Q4-T7 | Q4 | 6.2 | 68 | 2.5   | 2.0  | 0.4 granite  |
| 171 | ShC-Q4-T7 | Q4 | 6.2 | 69 | 1.2   | 0.8  | 0.3 granite  |
| 172 | ShC-Q4-T7 | Q4 | 6.2 | 70 | 35.0  | 22.0 | 11.0 granite |
| 173 | ShC-Q4-T7 | Q4 | 6.2 | 71 | 1.3   | 0.9  | 0.5 granite  |
| 174 | ShC-Q4-T7 | Q4 | 6.2 | 72 | 44.0  | 25.0 | 5.0 granite  |
| 175 | ShC-Q4-T7 | Q4 | 6.2 | 73 | 90.0  | 31.0 | 17.0 granite |
| 176 | ShC-Q4-T7 | Q4 | 6.2 | 74 | 1.2   | 0.9  | 0.4 granite  |
| 177 | ShC-Q4-T7 | Q4 | 6.2 | 75 | 1.9   | 1.6  | 0.3 granite  |
| 178 | ShC-Q4-T7 | Q4 | 6.2 | 76 | 1.3   | 0.9  | 0.7 granite  |
| 179 | ShC-Q4-T7 | Q4 | 6.2 | 77 | 1.2   | 1.2  | 0.9 granite  |
| 180 | ShC-Q4-T7 | Q4 | 6.2 | 78 | 2.2   | 1.7  | 1.6 granite  |
| 181 | ShC-Q4-T7 | Q4 | 6.2 | 79 | 1.8   | 1.5  | 1.4 granite  |
| 182 | ShC-Q4-T7 | Q4 | 6.2 | 80 | 1.8   | 1.8  | 1.3 granite  |
| 183 | ShC-Q4-T7 | Q4 | 6.2 | 81 | 1.0   | 0.9  | 0.4 granite  |
| 184 | ShC-Q4-T7 | Q4 | 6.2 | 82 | 2.2   | 1.7  | 0.8 granite  |
| 185 | ShC-Q4-T7 | Q4 | 6.2 | 83 | 1.1   | 1.0  | 0.4 granite  |

|     |           |    |      |     |       |      |              |
|-----|-----------|----|------|-----|-------|------|--------------|
| 186 | ShC-Q4-T7 | Q4 | 6.2  | 84  | 1.5   | 1.2  | 0.6 granite  |
| 187 | ShC-Q4-T7 | Q4 | 6.2  | 85  | 2.5   | 1.6  | 1.2 granite  |
| 188 | ShC-Q4-T7 | Q4 | 6.2  | 86  | 1.2   | 0.9  | 0.7 granite  |
| 189 | ShC-Q4-T7 | Q4 | 6.2  | 87  | 1.8   | 1.5  | 1.0 granite  |
| 190 | ShC-Q4-T7 | Q4 | 6.2  | 88  | 2.1   | 1.6  | 1.3 granite  |
| 191 | ShC-Q4-T7 | Q4 | 6.2  | 89  | 1.3   | 0.9  | 0.6 granite  |
| 192 | ShC-Q4-T7 | Q4 | 6.2  | 90  | 1.5   | 1.2  | 1.1 granite  |
| 193 | ShC-Q4-T7 | Q4 | 6.2  | 91  | 1.3   | 1.1  | 0.8 granite  |
| 194 | ShC-Q4-T7 | Q4 | 6.2  | 92  | 54.0  | 30.0 | 17.0 granite |
| 195 | ShC-Q4-T7 | Q4 | 6.2  | 93  | 1.8   | 1.3  | 1.0 granite  |
| 196 | ShC-Q4-T7 | Q4 | 6.2  | 94  | 1.6   | 1.3  | 0.6 granite  |
| 197 | ShC-Q4-T7 | Q4 | 6.2  | 95  | 2.6   | 2.0  | 0.8 granite  |
| 198 | ShC-Q4-T7 | Q4 | 6.2  | 96  | 1.2   | 1.0  | 0.5 granite  |
| 199 | ShC-Q4-T7 | Q4 | 6.2  | 97  | 1.3   | 1.3  | 0.9 granite  |
| 200 | ShC-Q4-T7 | Q4 | 6.2  | 98  | 55.0  | 48.0 | 9.0 granite  |
| 201 | ShC-Q4-T7 | Q4 | 6.2  | 99  | 28.0  | 24.0 | 11.0 granite |
| 202 | ShC-Q4-T7 | Q4 | 6.2  | 100 | 2.2   | 1.5  | 1.2 granite  |
| 203 | ShC-Q3-T6 | Q3 | 20.9 | 1   | 5.0   | 3.4  | 1.3 granite  |
| 204 | ShC-Q3-T6 | Q3 | 20.9 | 2   | 16.0  | 12.7 | 7.8 granite  |
| 205 | ShC-Q3-T6 | Q3 | 20.9 | 3   | 29.0  | 20.0 | 6.0 granite  |
| 206 | ShC-Q3-T6 | Q3 | 20.9 | 4   | 16.5  | 9.0  | 2.5 granite  |
| 207 | ShC-Q3-T6 | Q3 | 20.9 | 5   | 2.4   | 2.1  | 1.6 granite  |
| 208 | ShC-Q3-T6 | Q3 | 20.9 | 6   | 11.5  | 7.5  | 12.5 granite |
| 209 | ShC-Q3-T6 | Q3 | 20.9 | 7   | 72.0  | 41.0 | 27.0 granite |
| 210 | ShC-Q3-T6 | Q3 | 20.9 | 8   | 31.0  | 20.5 | 24.0 granite |
| 211 | ShC-Q3-T6 | Q3 | 20.9 | 9   | 12.7  | 7.5  | 3.5 granite  |
| 212 | ShC-Q3-T6 | Q3 | 20.9 | 10  | 11.0  | 8.0  | 4.2 granite  |
| 213 | ShC-Q3-T6 | Q3 | 20.9 | 11  | 17.0  | 15.5 | 2.0 granite  |
| 214 | ShC-Q3-T6 | Q3 | 20.9 | 12  | 73.0  | 27.0 | 35.0 granite |
| 215 | ShC-Q3-T6 | Q3 | 20.9 | 13  | 30.0  | 21.0 | 15.0 granite |
| 216 | ShC-Q3-T6 | Q3 | 20.9 | 14  | 58.0  | 45.0 | 29.0 granite |
| 217 | ShC-Q3-T6 | Q3 | 20.9 | 15  | 193.0 | 82.0 | 71.0 granite |
| 218 | ShC-Q3-T6 | Q3 | 20.9 | 16  | 18.0  | 15.5 | 11.0 granite |
| 219 | ShC-Q3-T6 | Q3 | 20.9 | 17  | 13.8  | 13.0 | 7.5 granite  |
| 220 | ShC-Q3-T6 | Q3 | 20.9 | 18  | 54.0  | 38.0 | 19.0 granite |
| 221 | ShC-Q3-T6 | Q3 | 20.9 | 19  | 80.0  | 38.0 | 38.0 granite |
| 222 | ShC-Q3-T6 | Q3 | 20.9 | 20  | 34.5  | 27.0 | 18.0 granite |
| 223 | ShC-Q3-T6 | Q3 | 20.9 | 21  | 18.0  | 8.0  | 4.0 granite  |
| 224 | ShC-Q3-T6 | Q3 | 20.9 | 22  | 30.5  | 18.0 | 6.0 granite  |
| 225 | ShC-Q3-T6 | Q3 | 20.9 | 23  | 46.0  | 22.5 | 19.0 granite |
| 226 | ShC-Q3-T6 | Q3 | 20.9 | 24  | 52.0  | 36.0 | 19.0 granite |
| 227 | ShC-Q3-T7 | Q3 | 20.9 | 25  | 1.0   | 0.5  | 0.8 granite  |
| 228 | ShC-Q3-T7 | Q3 | 20.9 | 26  | 5.3   | 4.0  | 1.9 granite  |
| 229 | ShC-Q3-T7 | Q3 | 20.9 | 27  | 2.4   | 1.5  | 1.2 granite  |
| 230 | ShC-Q3-T7 | Q3 | 20.9 | 28  | 15.0  | 10.2 | 2.0 granite  |
| 231 | ShC-Q3-T7 | Q3 | 20.9 | 29  | 23.0  | 11.0 | 6.5 granite  |
| 232 | ShC-Q3-T7 | Q3 | 20.9 | 30  | 1.9   | 1.6  | 1.4 granite  |

|     |           |    |      |    |      |      |              |
|-----|-----------|----|------|----|------|------|--------------|
| 233 | ShC-Q3-T7 | Q3 | 20.9 | 31 | 2.4  | 1.8  | 0.9 granite  |
| 234 | ShC-Q3-T7 | Q3 | 20.9 | 32 | 43.0 | 27.5 | 6.0 granite  |
| 235 | ShC-Q3-T7 | Q3 | 20.9 | 33 | 2.5  | 2.1  | 1.2 granite  |
| 236 | ShC-Q3-T7 | Q3 | 20.9 | 34 | 1.3  | 0.9  | 0.8 granite  |
| 237 | ShC-Q3-T7 | Q3 | 20.9 | 35 | 11.0 | 4.5  | 4.0 granite  |
| 238 | ShC-Q3-T7 | Q3 | 20.9 | 36 | 2.0  | 1.4  | 0.9 granite  |
| 239 | ShC-Q3-T7 | Q3 | 20.9 | 37 | 2.4  | 1.6  | 1.1 granite  |
| 240 | ShC-Q3-T7 | Q3 | 20.9 | 38 | 3.8  | 2.0  | 1.9 granite  |
| 241 | ShC-Q3-T7 | Q3 | 20.9 | 39 | 1.9  | 1.4  | 0.6 granite  |
| 242 | ShC-Q3-T7 | Q3 | 20.9 | 40 | 1.1  | 0.8  | 0.7 granite  |
| 243 | ShC-Q3-T7 | Q3 | 20.9 | 41 | 4.8  | 4.8  | 2.1 granite  |
| 244 | ShC-Q3-T7 | Q3 | 20.9 | 42 | 1.0  | 0.6  | 0.4 granite  |
| 245 | ShC-Q3-T7 | Q3 | 20.9 | 43 | 1.1  | 0.9  | 0.8 granite  |
| 246 | ShC-Q3-T7 | Q3 | 20.9 | 44 | 1.7  | 1.1  | 0.6 granite  |
| 247 | ShC-Q3-T7 | Q3 | 20.9 | 45 | 2.3  | 1.9  | 0.7 granite  |
| 248 | ShC-Q3-T7 | Q3 | 20.9 | 46 | 1.8  | 1.0  | 0.7 granite  |
| 249 | ShC-Q3-T7 | Q3 | 20.9 | 47 | 2.2  | 1.6  | 1.3 granite  |
| 250 | ShC-Q3-T7 | Q3 | 20.9 | 48 | 1.4  | 1.1  | 4.0 granite  |
| 251 | ShC-Q3-T7 | Q3 | 20.9 | 49 | 31.0 | 24.0 | 21.0 granite |
| 252 | ShC-Q3-T7 | Q3 | 20.9 | 50 | 1.8  | 1.5  | 1.0 granite  |
| 253 | ShC-Q3-T7 | Q3 | 20.9 | 51 | 3.4  | 2.4  | 1.5 granite  |
| 254 | ShC-Q3-T7 | Q3 | 20.9 | 52 | 2.0  | 1.4  | 1.2 granite  |
| 255 | ShC-Q3-T7 | Q3 | 20.9 | 53 | 3.7  | 2.9  | 2.0 granite  |
| 256 | ShC-Q3-T7 | Q3 | 20.9 | 54 | 1.3  | 0.9  | 0.6 granite  |
| 257 | ShC-Q3-T7 | Q3 | 20.9 | 55 | 1.7  | 0.8  | 0.8 granite  |
| 258 | ShC-Q3-T7 | Q3 | 20.9 | 56 | 37.0 | 31.0 | 10.0 granite |
| 259 | ShC-Q3-T8 | Q3 | 20.9 | 57 | 43.0 | 42.0 | 10.0 granite |
| 260 | ShC-Q3-T8 | Q3 | 20.9 | 58 | 5.2  | 3.1  | 2.1 granite  |
| 261 | ShC-Q3-T8 | Q3 | 20.9 | 59 | 1.6  | 1.3  | 0.8 granite  |
| 262 | ShC-Q3-T8 | Q3 | 20.9 | 60 | 5.2  | 3.9  | 1.7 granite  |
| 263 | ShC-Q3-T8 | Q3 | 20.9 | 61 | 2.8  | 2.1  | 1.6 granite  |
| 264 | ShC-Q3-T8 | Q3 | 20.9 | 62 | 42.0 | 22.0 | 13.0 granite |
| 265 | ShC-Q3-T8 | Q3 | 20.9 | 63 | 2.9  | 1.6  | 1.0 granite  |
| 266 | ShC-Q3-T8 | Q3 | 20.9 | 64 | 3.6  | 2.6  | 2.4 granite  |
| 267 | ShC-Q3-T8 | Q3 | 20.9 | 65 | 1.4  | 1.2  | 0.6 granite  |
| 268 | ShC-Q3-T8 | Q3 | 20.9 | 66 | 16.5 | 18.0 | 7.0 granite  |
| 269 | ShC-Q3-T8 | Q3 | 20.9 | 67 | 2.3  | 1.7  | 1.1 granite  |
| 270 | ShC-Q3-T8 | Q3 | 20.9 | 68 | 1.2  | 1.0  | 0.8 granite  |
| 271 | ShC-Q3-T8 | Q3 | 20.9 | 69 | 1.4  | 1.0  | 0.6 granite  |
| 272 | ShC-Q3-T8 | Q3 | 20.9 | 70 | 24.0 | 11.0 | 10.0 granite |
| 273 | ShC-Q3-T8 | Q3 | 20.9 | 71 | 40.0 | 21.0 | 17.0 granite |
| 274 | ShC-Q3-T8 | Q3 | 20.9 | 72 | 9.0  | 7.0  | 3.0 granite  |
| 275 | ShC-Q3-T8 | Q3 | 20.9 | 73 | 9.0  | 5.0  | 4.0 granite  |
| 276 | ShC-Q3-T8 | Q3 | 20.9 | 74 | 42.0 | 30.5 | 9.0 granite  |
| 277 | ShC-Q3-T8 | Q3 | 20.9 | 75 | 2.2  | 1.9  | 1.2 granite  |
| 278 | ShC-Q3-T8 | Q3 | 20.9 | 76 | 9.3  | 7.5  | 6.2 granite  |
| 279 | ShC-Q3-T8 | Q3 | 20.9 | 77 | 2.4  | 1.2  | 1.2 granite  |

|     |            |     |      |     |      |      |              |
|-----|------------|-----|------|-----|------|------|--------------|
| 280 | ShC-Q3-T8  | Q3  | 20.9 | 78  | 1.4  | 1.2  | 0.7 granite  |
| 281 | ShC-Q3-T8  | Q3  | 20.9 | 79  | 4.9  | 3.4  | 2.7 granite  |
| 282 | ShC-Q3-T8  | Q3  | 20.9 | 80  | 5.3  | 3.6  | 2.1 granite  |
| 283 | ShC-Q3-T8  | Q3  | 20.9 | 81  | 6.5  | 6.3  | 3.0 granite  |
| 284 | ShC-Q3-T8  | Q3  | 20.9 | 82  | 6.0  | 4.1  | 2.0 granite  |
| 285 | ShC-Q3-T8  | Q3  | 20.9 | 83  | 5.6  | 3.5  | 1.8 granite  |
| 286 | ShC-Q3-T8  | Q3  | 20.9 | 84  | 3.1  | 2.7  | 2.0 granite  |
| 287 | ShC-Q3-T8  | Q3  | 20.9 | 85  | 1.0  | 0.9  | 0.2 granite  |
| 288 | ShC-Q3-T8  | Q3  | 20.9 | 86  | 1.2  | 1.1  | 0.6 granite  |
| 289 | ShC-Q3-T8  | Q3  | 20.9 | 87  | 18.5 | 13.0 | 6.0 granite  |
| 290 | ShC-Q3-T8  | Q3  | 20.9 | 88  | 58.0 | 50.0 | 26.0 granite |
| 291 | ShC-Q3-T8  | Q3  | 20.9 | 89  | 6.1  | 5.1  | 2.2 granite  |
| 292 | ShC-Q3-T8  | Q3  | 20.9 | 90  | 2.4  | 1.8  | 1.1 granite  |
| 293 | ShC-Q3-T8  | Q3  | 20.9 | 91  | 1.4  | 0.9  | 0.3 granite  |
| 294 | ShC-Q3-T8  | Q3  | 20.9 | 92  | 1.1  | 0.9  | 0.6 granite  |
| 295 | ShC-Q3-T8  | Q3  | 20.9 | 93  | 46.0 | 23.0 | 12.0 granite |
| 296 | ShC-Q3-T8  | Q3  | 20.9 | 94  | 1.8  | 1.5  | 0.9 granite  |
| 297 | ShC-Q3-T8  | Q3  | 20.9 | 95  | 25.0 | 18.0 | 8.0 granite  |
| 298 | ShC-Q3-T8  | Q3  | 20.9 | 96  | 3.8  | 3.2  | 2.7 granite  |
| 299 | ShC-Q3-T8  | Q3  | 20.9 | 97  | 7.0  | 6.6  | 3.2 granite  |
| 300 | ShC-Q3-T8  | Q3  | 20.9 | 98  | 8.0  | 5.7  | 3.5 granite  |
| 301 | ShC-Q3-T8  | Q3  | 20.9 | 99  | 43.0 | 43.0 | 21.0 granite |
| 302 | ShC-Q3-T8  | Q3  | 20.9 | 100 | 4.8  | 3.1  | 2.2 granite  |
| 303 | ShC-Q2c-T6 | Q2c | 33.1 | 1   | 47.0 | 33.0 | 5.0 granite  |
| 304 | ShC-Q2c-T6 | Q2c | 33.1 | 2   | 15.0 | 10.5 | 8.3 granite  |
| 305 | ShC-Q2c-T6 | Q2c | 33.1 | 3   | 1.0  | 0.9  | 0.5 granite  |
| 306 | ShC-Q2c-T6 | Q2c | 33.1 | 4   | 2.8  | 19.0 | 14.0 granite |
| 307 | ShC-Q2c-T6 | Q2c | 33.1 | 5   | 1.8  | 1.4  | 1.2 granite  |
| 308 | ShC-Q2c-T6 | Q2c | 33.1 | 6   | 24.0 | 21.0 | 14.0 granite |
| 309 | ShC-Q2c-T6 | Q2c | 33.1 | 7   | 3.9  | 3.8  | 1.5 granite  |
| 310 | ShC-Q2c-T6 | Q2c | 33.1 | 8   | 5.6  | 7.1  | 2.3 granite  |
| 311 | ShC-Q2c-T6 | Q2c | 33.1 | 9   | 1.5  | 1.3  | 0.7 granite  |
| 312 | ShC-Q2c-T6 | Q2c | 33.1 | 10  | 2.4  | 1.8  | 1.1 granite  |
| 313 | ShC-Q2c-T6 | Q2c | 33.1 | 11  | 25.0 | 23.0 | 5.0 granite  |
| 314 | ShC-Q2c-T6 | Q2c | 33.1 | 12  | 1.2  | 1.0  | 0.6 granite  |
| 315 | ShC-Q2c-T6 | Q2c | 33.1 | 13  | 26.5 | 21.5 | 6.0 granite  |
| 316 | ShC-Q2c-T6 | Q2c | 33.1 | 14  | 44.0 | 31.0 | 9.0 granite  |
| 317 | ShC-Q2c-T6 | Q2c | 33.1 | 15  | 31.0 | 22.0 | 6.0 granite  |
| 318 | ShC-Q2c-T6 | Q2c | 33.1 | 16  | 1.2  | 1.0  | 0.9 granite  |
| 319 | ShC-Q2c-T6 | Q2c | 33.1 | 17  | 1.3  | 1.1  | 0.5 granite  |
| 320 | ShC-Q2c-T6 | Q2c | 33.1 | 18  | 1.8  | 1.2  | 0.6 granite  |
| 321 | ShC-Q2c-T6 | Q2c | 33.1 | 19  | 33.5 | 17.0 | 12.0 granite |
| 322 | ShC-Q2c-T6 | Q2c | 33.1 | 20  | 14.0 | 8.0  | 7.0 granite  |
| 323 | ShC-Q2c-T6 | Q2c | 33.1 | 21  | 1.7  | 1.3  | 0.9 granite  |
| 324 | ShC-Q2c-T6 | Q2c | 33.1 | 22  | 1.8  | 1.6  | 0.7 granite  |
| 325 | ShC-Q2c-T6 | Q2c | 33.1 | 23  | 2.5  | 2.0  | 1.4 granite  |
| 326 | ShC-Q2c-T6 | Q2c | 33.1 | 24  | 1.7  | 1.3  | 1.0 granite  |

|     |            |     |      |    |      |      |              |
|-----|------------|-----|------|----|------|------|--------------|
| 327 | ShC-Q2c-T6 | Q2c | 33.1 | 25 | 1.9  | 1.4  | 0.7 granite  |
| 328 | ShC-Q2c-T6 | Q2c | 33.1 | 26 | 40.0 | 17.0 | 5.0 granite  |
| 329 | ShC-Q2c-T6 | Q2c | 33.1 | 27 | 2.2  | 2.0  | 0.2 granite  |
| 330 | ShC-Q2c-T6 | Q2c | 33.1 | 28 | 2.2  | 1.7  | 0.9 granite  |
| 331 | ShC-Q2c-T6 | Q2c | 33.1 | 29 | 1.7  | 1.4  | 0.9 granite  |
| 332 | ShC-Q2c-T6 | Q2c | 33.1 | 30 | 1.4  | 1.2  | 0.4 granite  |
| 333 | ShC-Q2c-T6 | Q2c | 33.1 | 31 | 1.4  | 1.1  | 0.9 granite  |
| 334 | ShC-Q2c-T6 | Q2c | 33.1 | 32 | 1.6  | 1.1  | 0.8 granite  |
| 335 | ShC-Q2c-T6 | Q2c | 33.1 | 33 | 1.2  | 0.9  | 0.4 granite  |
| 336 | ShC-Q2c-T6 | Q2c | 33.1 | 34 | 1.5  | 1.1  | 0.7 granite  |
| 337 | ShC-Q2c-T6 | Q2c | 33.1 | 35 | 21.0 | 1.2  | 0.6 granite  |
| 338 | ShC-Q2c-T6 | Q2c | 33.1 | 36 | 2.7  | 1.9  | 1.6 granite  |
| 339 | ShC-Q2c-T6 | Q2c | 33.1 | 37 | 3.9  | 3.2  | 1.8 granite  |
| 340 | ShC-Q2c-T6 | Q2c | 33.1 | 38 | 4.6  | 3.0  | 1.5 granite  |
| 341 | ShC-Q2c-T6 | Q2c | 33.1 | 39 | 3.1  | 3.1  | 1.8 granite  |
| 342 | ShC-Q2c-T6 | Q2c | 33.1 | 40 | 4.6  | 3.0  | 1.5 granite  |
| 343 | ShC-Q2c-T6 | Q2c | 33.1 | 41 | 3.1  | 3.1  | 1.8 granite  |
| 344 | ShC-Q2c-T6 | Q2c | 33.1 | 42 | 17.0 | 11.0 | 3.0 granite  |
| 345 | ShC-Q2c-T6 | Q2c | 33.1 | 43 | 2.0  | 1.3  | 1.0 granite  |
| 346 | ShC-Q2c-T6 | Q2c | 33.1 | 44 | 1.3  | 0.9  | 0.8 granite  |
| 347 | ShC-Q2c-T6 | Q2c | 33.1 | 45 | 3.1  | 1.8  | 1.5 granite  |
| 348 | ShC-Q2c-T6 | Q2c | 33.1 | 46 | 30.0 | 23.0 | 12.0 granite |
| 349 | ShC-Q2c-T6 | Q2c | 33.1 | 47 | 47.0 | 30.0 | 19.0 granite |
| 350 | ShC-Q2c-T6 | Q2c | 33.1 | 48 | 39.0 | 22.0 | 10.0 granite |
| 351 | ShC-Q2c-T6 | Q2c | 33.1 | 49 | 23.0 | 19.0 | 21.0 granite |
| 352 | ShC-Q2c-T6 | Q2c | 33.1 | 50 | 2.1  | 1.3  | 1.2 granite  |
| 353 | ShC-Q2c-T6 | Q2c | 33.1 | 51 | 39.0 | 27.0 | 8.0 granite  |
| 354 | ShC-Q2c-T6 | Q2c | 33.1 | 52 | 1.3  | 1.1  | 1.0 granite  |
| 355 | ShC-Q2c-T6 | Q2c | 33.1 | 53 | 2.5  | 2.0  | 1.2 granite  |
| 356 | ShC-Q2c-T6 | Q2c | 33.1 | 54 | 32.0 | 31.0 | 22.0 granite |
| 357 | ShC-Q2c-T6 | Q2c | 33.1 | 55 | 74.0 | 61.0 | 26.0 granite |
| 358 | ShC-Q2c-T6 | Q2c | 33.1 | 56 | 73.0 | 30.0 | 21.0 granite |
| 359 | ShC-Q2c-T6 | Q2c | 33.1 | 57 | 21.0 | 11.0 | 9.0 granite  |
| 360 | ShC-Q2c-T6 | Q2c | 33.1 | 58 | 26.0 | 14.0 | 6.0 granite  |
| 361 | ShC-Q2c-T6 | Q2c | 33.1 | 59 | 1.2  | 1.2  | 1.0 granite  |
| 362 | ShC-Q2c-T6 | Q2c | 33.1 | 60 | 1.3  | 1.0  | 0.5 granite  |
| 363 | ShC-Q2c-T6 | Q2c | 33.1 | 61 | 2.9  | 2.1  | 1.6 granite  |
| 364 | ShC-Q2c-T6 | Q2c | 33.1 | 62 | 1.3  | 1.0  | 0.5 granite  |
| 365 | ShC-Q2c-T6 | Q2c | 33.1 | 63 | 1.3  | 1.0  | 0.5 granite  |
| 366 | ShC-Q2c-T6 | Q2c | 33.1 | 64 | 1.9  | 1.5  | 0.7 granite  |
| 367 | ShC-Q2c-T6 | Q2c | 33.1 | 65 | 2.6  | 1.9  | 1.1 granite  |
| 368 | ShC-Q2c-T6 | Q2c | 33.1 | 66 | 1.6  | 1.0  | 0.5 granite  |
| 369 | ShC-Q2c-T6 | Q2c | 33.1 | 67 | 4.1  | 2.7  | 2.1 granite  |
| 370 | ShC-Q2c-T6 | Q2c | 33.1 | 68 | 32.0 | 30.0 | 10.0 granite |
| 371 | ShC-Q2c-T6 | Q2c | 33.1 | 69 | 36.0 | 22.0 | 10.0 granite |
| 372 | ShC-Q2c-T6 | Q2c | 33.1 | 70 | 28.0 | 19.0 | 7.0 granite  |
| 373 | ShC-Q2c-T6 | Q2c | 33.1 | 71 | 1.5  | 1.5  | 0.5 granite  |

|     |            |     |      |     |      |      |              |
|-----|------------|-----|------|-----|------|------|--------------|
| 374 | ShC-Q2c-T6 | Q2c | 33.1 | 72  | 1.3  | 1.2  | 0.8 granite  |
| 375 | ShC-Q2c-T6 | Q2c | 33.1 | 73  | 1.4  | 1.1  | 0.9 granite  |
| 376 | ShC-Q2c-T6 | Q2c | 33.1 | 74  | 1.3  | 1.1  | 1.0 granite  |
| 377 | ShC-Q2c-T6 | Q2c | 33.1 | 75  | 3.5  | 3.2  | 1.7 granite  |
| 378 | ShC-Q2c-T6 | Q2c | 33.1 | 76  | 2.3  | 1.8  | 1.3 granite  |
| 379 | ShC-Q2c-T6 | Q2c | 33.1 | 77  | 6.8  | 4.6  | 3.3 granite  |
| 380 | ShC-Q2c-T6 | Q2c | 33.1 | 78  | 2.5  | 2.2  | 1.3 granite  |
| 381 | ShC-Q2c-T6 | Q2c | 33.1 | 79  | 2.2  | 1.9  | 1.3 granite  |
| 382 | ShC-Q2c-T6 | Q2c | 33.1 | 80  | 2.6  | 1.8  | 1.2 granite  |
| 383 | ShC-Q2c-T6 | Q2c | 33.1 | 81  | 1.1  | 1.0  | 0.6 granite  |
| 384 | ShC-Q2c-T6 | Q2c | 33.1 | 82  | 1.3  | 1.0  | 0.6 granite  |
| 385 | ShC-Q2c-T6 | Q2c | 33.1 | 83  | 1.7  | 1.6  | 0.9 granite  |
| 386 | ShC-Q2c-T6 | Q2c | 33.1 | 84  | 1.2  | 1.1  | 0.4 granite  |
| 387 | ShC-Q2c-T6 | Q2c | 33.1 | 85  | 1.5  | 1.1  | 0.9 granite  |
| 388 | ShC-Q2c-T6 | Q2c | 33.1 | 86  | 3.0  | 2.1  | 1.4 granite  |
| 389 | ShC-Q2c-T6 | Q2c | 33.1 | 87  | 1.1  | 1.0  | 0.6 granite  |
| 390 | ShC-Q2c-T6 | Q2c | 33.1 | 88  | 2.5  | 2.0  | 1.9 granite  |
| 391 | ShC-Q2c-T6 | Q2c | 33.1 | 89  | 2.9  | 1.8  | 1.4 granite  |
| 392 | ShC-Q2c-T6 | Q2c | 33.1 | 90  | 17.0 | 8.0  | 12.0 granite |
| 393 | ShC-Q2c-T6 | Q2c | 33.1 | 91  | 1.2  | 0.9  | 0.5 granite  |
| 394 | ShC-Q2c-T6 | Q2c | 33.1 | 92  | 25.0 | 18.0 | 9.0 granite  |
| 395 | ShC-Q2c-T6 | Q2c | 33.1 | 93  | 40.0 | 24.0 | 13.0 granite |
| 396 | ShC-Q2c-T6 | Q2c | 33.1 | 94  | 1.5  | 0.9  | 0.5 granite  |
| 397 | ShC-Q2c-T6 | Q2c | 33.1 | 95  | 1.2  | 1.0  | 0.9 granite  |
| 398 | ShC-Q2c-T6 | Q2c | 33.1 | 96  | 41.0 | 21.0 | 8.0 granite  |
| 399 | ShC-Q2c-T6 | Q2c | 33.1 | 97  | 1.4  | 1.1  | 0.9 granite  |
| 400 | ShC-Q2c-T6 | Q2c | 33.1 | 98  | 60.0 | 43.0 | 32.0 granite |
| 401 | ShC-Q2c-T6 | Q2c | 33.1 | 99  | 1.8  | 1.1  | 1.0 granite  |
| 402 | ShC-Q2c-T6 | Q2c | 33.1 | 100 | 60.0 | 40.0 | 16.0 granite |
| 403 | ShC-Q4-T9  | Q4  | 6.2  | 1   | 1.5  | 1.0  | 0.7 granite  |
| 404 | ShC-Q4-T9  | Q4  | 6.2  | 2   | 44.0 | 26.0 | 16.0 granite |
| 405 | ShC-Q4-T9  | Q4  | 6.2  | 3   | 28.0 | 16.0 | 12.0 granite |
| 406 | ShC-Q4-T9  | Q4  | 6.2  | 4   | 20.0 | 15.0 | 10.0 granite |
| 407 | ShC-Q4-T9  | Q4  | 6.2  | 5   | 4.5  | 3.3  | 1.8 granite  |
| 408 | ShC-Q4-T9  | Q4  | 6.2  | 6   | 2.9  | 2.0  | 1.5 granite  |
| 409 | ShC-Q4-T9  | Q4  | 6.2  | 7   | 3.3  | 2.7  | 1.0 granite  |
| 410 | ShC-Q4-T9  | Q4  | 6.2  | 8   | 1.6  | 1.1  | 0.8 granite  |
| 411 | ShC-Q4-T9  | Q4  | 6.2  | 9   | 1.0  | 1.0  | 0.6 granite  |
| 412 | ShC-Q4-T9  | Q4  | 6.2  | 10  | 1.3  | 1.0  | 1.0 granite  |
| 413 | ShC-Q4-T9  | Q4  | 6.2  | 11  | 46.0 | 40.0 | 19.0 granite |
| 414 | ShC-Q4-T9  | Q4  | 6.2  | 12  | 1.2  | 0.7  | 0.6 granite  |
| 415 | ShC-Q4-T9  | Q4  | 6.2  | 13  | 1.7  | 1.4  | 0.8 granite  |
| 416 | ShC-Q4-T9  | Q4  | 6.2  | 14  | 2.8  | 2.1  | 1.3 granite  |
| 417 | ShC-Q4-T9  | Q4  | 6.2  | 15  | 33.0 | 23.0 | 15.0 granite |
| 418 | ShC-Q4-T9  | Q4  | 6.2  | 16  | 44.0 | 21.0 | 21.0 granite |
| 419 | ShC-Q4-T9  | Q4  | 6.2  | 17  | 18.0 | 11.0 | 10.0 granite |
| 420 | ShC-Q4-T9  | Q4  | 6.2  | 18  | 54.0 | 47.0 | 22.0 granite |

|     |           |    |     |    |       |       |              |
|-----|-----------|----|-----|----|-------|-------|--------------|
| 421 | ShC-Q4-T9 | Q4 | 6.2 | 19 | 1.7   | 1.6   | 0.8 granite  |
| 422 | ShC-Q4-T9 | Q4 | 6.2 | 20 | 72.0  | 42.0  | 32.0 granite |
| 423 | ShC-Q4-T9 | Q4 | 6.2 | 21 | 52.0  | 44.0  | 17.0 granite |
| 424 | ShC-Q4-T9 | Q4 | 6.2 | 22 | 94.0  | 31.0  | 24.0 granite |
| 425 | ShC-Q4-T9 | Q4 | 6.2 | 23 | 55.0  | 33.0  | 35.0 granite |
| 426 | ShC-Q4-T9 | Q4 | 6.2 | 24 | 42.0  | 41.0  | 20.0 granite |
| 427 | ShC-Q4-T9 | Q4 | 6.2 | 25 | 2.2   | 1.9   | 1.2 granite  |
| 428 | ShC-Q4-T9 | Q4 | 6.2 | 26 | 31.0  | 24.0  | 12.0 granite |
| 429 | ShC-Q4-T9 | Q4 | 6.2 | 27 | 1.1   | 1.0   | 0.9 granite  |
| 430 | ShC-Q4-T9 | Q4 | 6.2 | 28 | 1.5   | 1.2   | 0.2 granite  |
| 431 | ShC-Q4-T9 | Q4 | 6.2 | 29 | 155.0 | 90.0  | 40.0 granite |
| 432 | ShC-Q4-T9 | Q4 | 6.2 | 30 | 2.2   | 2.0   | 1.5 granite  |
| 433 | ShC-Q4-T9 | Q4 | 6.2 | 31 | 2.1   | 1.7   | 1.2 granite  |
| 434 | ShC-Q4-T9 | Q4 | 6.2 | 32 | 56.0  | 27.0  | 16.0 granite |
| 435 | ShC-Q4-T9 | Q4 | 6.2 | 33 | 57.0  | 30.0  | 18.0 granite |
| 436 | ShC-Q4-T9 | Q4 | 6.2 | 34 | 2.4   | 1.8   | 1.4 granite  |
| 437 | ShC-Q4-T9 | Q4 | 6.2 | 35 | 1.4   | 0.9   | 0.4 granite  |
| 438 | ShC-Q4-T9 | Q4 | 6.2 | 36 | 1.8   | 1.5   | 0.2 granite  |
| 439 | ShC-Q4-T9 | Q4 | 6.2 | 37 | 2.4   | 2.1   | 1.0 granite  |
| 440 | ShC-Q4-T9 | Q4 | 6.2 | 38 | 3.2   | 2.2   | 0.6 granite  |
| 441 | ShC-Q4-T9 | Q4 | 6.2 | 39 | 4.9   | 4.5   | 1.3 granite  |
| 442 | ShC-Q4-T9 | Q4 | 6.2 | 40 | 5.7   | 3.8   | 2.0 granite  |
| 443 | ShC-Q4-T9 | Q4 | 6.2 | 41 | 2.0   | 1.7   | 1.0 granite  |
| 444 | ShC-Q4-T9 | Q4 | 6.2 | 42 | 2.2   | 1.4   | 1.1 granite  |
| 445 | ShC-Q4-T9 | Q4 | 6.2 | 43 | 192.0 | 180.0 | 87.0 granite |
| 446 | ShC-Q4-T9 | Q4 | 6.2 | 44 | 32.0  | 26.0  | 15.0 granite |
| 447 | ShC-Q4-T9 | Q4 | 6.2 | 45 | 132.0 | 105.0 | 70.0 granite |
| 448 | ShC-Q4-T9 | Q4 | 6.2 | 46 | 56.0  | 36.0  | 24.0 granite |
| 449 | ShC-Q4-T9 | Q4 | 6.2 | 47 | 88.0  | 44.0  | 34.0 granite |
| 450 | ShC-Q4-T9 | Q4 | 6.2 | 48 | 1.5   | 1.0   | 0.2 granite  |
| 451 | ShC-Q4-T9 | Q4 | 6.2 | 49 | 68.0  | 60.0  | 23.0 granite |
| 452 | ShC-Q4-T9 | Q4 | 6.2 | 50 | 1.4   | 0.8   | 0.8 granite  |
| 453 | ShC-Q4-T9 | Q4 | 6.2 | 51 | 1.4   | 0.9   | 0.6 granite  |
| 454 | ShC-Q4-T9 | Q4 | 6.2 | 52 | 64.0  | 43.0  | 40.0 granite |
| 455 | ShC-Q4-T9 | Q4 | 6.2 | 53 | 2.0   | 1.8   | 1.5 granite  |
| 456 | ShC-Q4-T9 | Q4 | 6.2 | 54 | 2.2   | 1.7   | 1.1 granite  |
| 457 | ShC-Q4-T9 | Q4 | 6.2 | 55 | 50.0  | 27.0  | 19.0 granite |
| 458 | ShC-Q4-T9 | Q4 | 6.2 | 56 | 1.1   | 1.0   | 0.5 granite  |
| 459 | ShC-Q4-T9 | Q4 | 6.2 | 57 | 97.0  | 44.0  | 23.0 granite |
| 460 | ShC-Q4-T9 | Q4 | 6.2 | 58 | 16.0  | 13.0  | 12.0 granite |
| 461 | ShC-Q4-T9 | Q4 | 6.2 | 59 | 19.0  | 15.0  | 9.0 granite  |
| 462 | ShC-Q4-T9 | Q4 | 6.2 | 60 | 42.0  | 24.0  | 29.0 granite |
| 463 | ShC-Q4-T9 | Q4 | 6.2 | 61 | 2.4   | 1.5   | 1.5 granite  |
| 464 | ShC-Q4-T9 | Q4 | 6.2 | 62 | 1.3   | 1.0   | 0.8 granite  |
| 465 | ShC-Q4-T9 | Q4 | 6.2 | 63 | 2.0   | 1.5   | 0.9 granite  |
| 466 | ShC-Q4-T9 | Q4 | 6.2 | 64 | 3.1   | 1.5   | 0.7 granite  |
| 467 | ShC-Q4-T9 | Q4 | 6.2 | 65 | 1.5   | 1.0   | 0.6 granite  |

|     |            |     |      |     |      |      |              |
|-----|------------|-----|------|-----|------|------|--------------|
| 468 | ShC-Q4-T9  | Q4  | 6.2  | 66  | 1.9  | 1.0  | 0.7 granite  |
| 469 | ShC-Q4-T9  | Q4  | 6.2  | 67  | 38.0 | 25.0 | 9.0 granite  |
| 470 | ShC-Q4-T9  | Q4  | 6.2  | 68  | 2.2  | 2.0  | 0.2 granite  |
| 471 | ShC-Q4-T9  | Q4  | 6.2  | 69  | 2.8  | 2.0  | 1.0 granite  |
| 472 | ShC-Q4-T9  | Q4  | 6.2  | 70  | 15.5 | 9.0  | 9.0 granite  |
| 473 | ShC-Q4-T9  | Q4  | 6.2  | 71  | 37.0 | 25.0 | 9.0 granite  |
| 474 | ShC-Q4-T9  | Q4  | 6.2  | 72  | 24.0 | 13.5 | 12.0 granite |
| 475 | ShC-Q4-T9  | Q4  | 6.2  | 73  | 32.0 | 20.0 | 11.0 granite |
| 476 | ShC-Q4-T9  | Q4  | 6.2  | 74  | 4.5  | 3.3  | 2.7 granite  |
| 477 | ShC-Q4-T9  | Q4  | 6.2  | 75  | 72.0 | 65.0 | 38.0 granite |
| 478 | ShC-Q4-T9  | Q4  | 6.2  | 76  | 2.2  | 1.5  | 1.0 granite  |
| 479 | ShC-Q4-T9  | Q4  | 6.2  | 77  | 1.8  | 1.2  | 0.5 granite  |
| 480 | ShC-Q4-T9  | Q4  | 6.2  | 78  | 92.0 | 29.0 | 28.0 granite |
| 481 | ShC-Q4-T9  | Q4  | 6.2  | 79  | 1.2  | 1.1  | 0.3 granite  |
| 482 | ShC-Q4-T9  | Q4  | 6.2  | 80  | 1.6  | 1.0  | 0.7 granite  |
| 483 | ShC-Q4-T9  | Q4  | 6.2  | 81  | 90.0 | 53.0 | 38.0 granite |
| 484 | ShC-Q4-T9  | Q4  | 6.2  | 82  | 22.0 | 12.0 | 3.0 granite  |
| 485 | ShC-Q4-T9  | Q4  | 6.2  | 83  | 41.0 | 28.0 | 13.0 granite |
| 486 | ShC-Q4-T9  | Q4  | 6.2  | 84  | 1.5  | 1.1  | 0.9 granite  |
| 487 | ShC-Q4-T9  | Q4  | 6.2  | 85  | 49.0 | 21.0 | 16.0 granite |
| 488 | ShC-Q4-T9  | Q4  | 6.2  | 86  | 1.2  | 0.8  | 0.7 granite  |
| 489 | ShC-Q4-T9  | Q4  | 6.2  | 87  | 48.0 | 30.0 | 16.0 granite |
| 490 | ShC-Q4-T9  | Q4  | 6.2  | 88  | 65.0 | 42.0 | 20.0 granite |
| 491 | ShC-Q4-T9  | Q4  | 6.2  | 89  | 2.5  | 1.5  | 1.2 granite  |
| 492 | ShC-Q4-T9  | Q4  | 6.2  | 90  | 1.5  | 1.1  | 0.8 granite  |
| 493 | ShC-Q4-T9  | Q4  | 6.2  | 91  | 1.1  | 1.0  | 0.5 granite  |
| 494 | ShC-Q4-T9  | Q4  | 6.2  | 92  | 2.8  | 1.6  | 1.1 granite  |
| 495 | ShC-Q4-T9  | Q4  | 6.2  | 93  | 63.0 | 50.0 | 25.0 granite |
| 496 | ShC-Q4-T9  | Q4  | 6.2  | 94  | 2.2  | 2.0  | 1.5 granite  |
| 497 | ShC-Q4-T9  | Q4  | 6.2  | 95  | 1.5  | 1.2  | 1.0 granite  |
| 498 | ShC-Q4-T9  | Q4  | 6.2  | 96  | 1.1  | 1.0  | 0.8 granite  |
| 499 | ShC-Q4-T9  | Q4  | 6.2  | 97  | 2.1  | 1.6  | 1.0 granite  |
| 500 | ShC-Q4-T9  | Q4  | 6.2  | 98  | 2.0  | 1.0  | 1.0 granite  |
| 501 | ShC-Q4-T9  | Q4  | 6.2  | 99  | 50.0 | 33.0 | 27.0 granite |
| 502 | ShC-Q4-T9  | Q4  | 6.2  | 100 | 51.0 | 39.0 | 36.0 granite |
| 503 | ShC-Q2a-T1 | Q2a | 76.3 | 1   | 1.3  | 1.1  | 0.5 granite  |
| 504 | ShC-Q2a-T1 | Q2a | 76.3 | 2   | 3.6  | 2.6  | 1.4 granite  |
| 505 | ShC-Q2a-T1 | Q2a | 76.3 | 3   | 2.1  | 1.2  | 0.9 granite  |
| 506 | ShC-Q2a-T1 | Q2a | 76.3 | 4   | 1.3  | 0.9  | 0.5 granite  |
| 507 | ShC-Q2a-T1 | Q2a | 76.3 | 5   | 1.5  | 1.3  | 1.1 granite  |
| 508 | ShC-Q2a-T1 | Q2a | 76.3 | 6   | 51.5 | 37.0 | 20.0 granite |
| 509 | ShC-Q2a-T1 | Q2a | 76.3 | 7   | 2.1  | 1.4  | 1.0 granite  |
| 510 | ShC-Q2a-T1 | Q2a | 76.3 | 8   | 56.0 | 42.0 | 16.0 granite |
| 511 | ShC-Q2a-T1 | Q2a | 76.3 | 9   | 1.2  | 1.0  | 0.9 granite  |
| 512 | ShC-Q2a-T1 | Q2a | 76.3 | 10  | 2.0  | 1.6  | 1.1 granite  |
| 513 | ShC-Q2a-T1 | Q2a | 76.3 | 11  | 1.8  | 1.2  | 1.0 granite  |
| 514 | ShC-Q2a-T1 | Q2a | 76.3 | 12  | 1.2  | 1.2  | 0.9 granite  |

|     |            |     |      |    |       |      |              |
|-----|------------|-----|------|----|-------|------|--------------|
| 515 | ShC-Q2a-T1 | Q2a | 76.3 | 13 | 1.9   | 1.2  | 1.0 granite  |
| 516 | ShC-Q2a-T1 | Q2a | 76.3 | 14 | 2.1   | 1.3  | 1.2 granite  |
| 517 | ShC-Q2a-T1 | Q2a | 76.3 | 15 | 47.0  | 35.0 | 15.0 granite |
| 518 | ShC-Q2a-T1 | Q2a | 76.3 | 16 | 98.0  | 73.0 | 43.0 granite |
| 519 | ShC-Q2a-T1 | Q2a | 76.3 | 17 | 1.5   | 1.4  | 1.0 granite  |
| 520 | ShC-Q2a-T2 | Q2a | 76.3 | 18 | 49.5  | 33.0 | 12.0 granite |
| 521 | ShC-Q2a-T2 | Q2a | 76.3 | 19 | 3.5   | 2.5  | 2.2 granite  |
| 522 | ShC-Q2a-T2 | Q2a | 76.3 | 20 | 1.3   | 1.3  | 0.9 granite  |
| 523 | ShC-Q2a-T2 | Q2a | 76.3 | 21 | 2.2   | 1.5  | 1.0 granite  |
| 524 | ShC-Q2a-T2 | Q2a | 76.3 | 22 | 120.0 | 98.0 | 40.0 granite |
| 525 | ShC-Q2a-T2 | Q2a | 76.3 | 23 | 2.3   | 1.6  | 1.0 granite  |
| 526 | ShC-Q2a-T2 | Q2a | 76.3 | 24 | 4.3   | 2.0  | 0.5 granite  |
| 527 | ShC-Q2a-T2 | Q2a | 76.3 | 25 | 2.8   | 1.7  | 1.5 granite  |
| 528 | ShC-Q2a-T2 | Q2a | 76.3 | 26 | 1.2   | 1.0  | 0.8 granite  |
| 529 | ShC-Q2a-T2 | Q2a | 76.3 | 27 | 1.2   | 1.1  | 0.8 granite  |
| 530 | ShC-Q2a-T2 | Q2a | 76.3 | 28 | 1.7   | 1.5  | 1.0 granite  |
| 531 | ShC-Q2a-T2 | Q2a | 76.3 | 29 | 4.7   | 3.3  | 2.0 granite  |
| 532 | ShC-Q2a-T2 | Q2a | 76.3 | 30 | 101.0 | 72.0 | 22.0 granite |
| 533 | ShC-Q2a-T2 | Q2a | 76.3 | 31 | 1.5   | 1.3  | 0.9 granite  |
| 534 | ShC-Q2a-T2 | Q2a | 76.3 | 32 | 1.3   | 0.8  | 0.7 granite  |
| 535 | ShC-Q2a-T2 | Q2a | 76.3 | 33 | 1.3   | 1.1  | 0.6 granite  |
| 536 | ShC-Q2a-T2 | Q2a | 76.3 | 34 | 1.4   | 0.8  | 0.7 granite  |
| 537 | ShC-Q2a-T2 | Q2a | 76.3 | 35 | 1.6   | 1.5  | 1.4 granite  |
| 538 | ShC-Q2a-T2 | Q2a | 76.3 | 36 | 1.8   | 1.5  | 1.2 granite  |
| 539 | ShC-Q2a-T2 | Q2a | 76.3 | 37 | 3.0   | 2.2  | 1.3 granite  |
| 540 | ShC-Q2a-T2 | Q2a | 76.3 | 38 | 1.7   | 1.3  | 0.9 granite  |
| 541 | ShC-Q2a-T2 | Q2a | 76.3 | 39 | 1.2   | 1.1  | 0.6 granite  |
| 542 | ShC-Q2a-T2 | Q2a | 76.3 | 40 | 1.5   | 1.2  | 1.0 granite  |
| 543 | ShC-Q2a-T2 | Q2a | 76.3 | 41 | 2.0   | 1.3  | 0.7 granite  |
| 544 | ShC-Q2a-T2 | Q2a | 76.3 | 42 | 1.2   | 0.9  | 0.7 granite  |
| 545 | ShC-Q2a-T2 | Q2a | 76.3 | 43 | 1.6   | 1.1  | 0.8 granite  |
| 546 | ShC-Q2a-T2 | Q2a | 76.3 | 44 | 1.7   | 1.3  | 0.9 granite  |
| 547 | ShC-Q2a-T2 | Q2a | 76.3 | 45 | 2.3   | 1.5  | 0.7 granite  |
| 548 | ShC-Q2a-T2 | Q2a | 76.3 | 46 | 1.8   | 1.2  | 1.0 granite  |
| 549 | ShC-Q2a-T2 | Q2a | 76.3 | 47 | 1.2   | 0.8  | 0.6 granite  |
| 550 | ShC-Q2a-T2 | Q2a | 76.3 | 48 | 1.8   | 1.7  | 1.1 granite  |
| 551 | ShC-Q2a-T2 | Q2a | 76.3 | 49 | 1.7   | 1.2  | 1.1 granite  |
| 552 | ShC-Q2a-T2 | Q2a | 76.3 | 50 | 1.3   | 1.2  | 0.7 granite  |
| 553 | ShC-Q2a-T2 | Q2a | 76.3 | 51 | 2.5   | 1.4  | 1.0 granite  |
| 554 | ShC-Q2a-T2 | Q2a | 76.3 | 52 | 2.8   | 1.8  | 1.0 granite  |
| 555 | ShC-Q2a-T2 | Q2a | 76.3 | 53 | 3.1   | 2.6  | 1.6 granite  |
| 556 | ShC-Q2a-T2 | Q2a | 76.3 | 54 | 2.9   | 2.1  | 1.5 granite  |
| 557 | ShC-Q2a-T2 | Q2a | 76.3 | 55 | 2.4   | 1.7  | 1.4 granite  |
| 558 | ShC-Q2a-T5 | Q2a | 76.3 | 56 | 1.5   | 1.3  | 0.7 granite  |
| 559 | ShC-Q2a-T5 | Q2a | 76.3 | 57 | 1.4   | 1.4  | 0.8 granite  |
| 560 | ShC-Q2a-T5 | Q2a | 76.3 | 58 | 1.6   | 1.2  | 0.5 granite  |
| 561 | ShC-Q2a-T5 | Q2a | 76.3 | 59 | 2.3   | 1.8  | 1.2 granite  |

|     |             |     |       |     |      |      |              |
|-----|-------------|-----|-------|-----|------|------|--------------|
| 562 | ShC-Q2a-T5  | Q2a | 76.3  | 60  | 1.3  | 1.0  | 0.7 granite  |
| 563 | ShC-Q2a-T5  | Q2a | 76.3  | 61  | 46.0 | 36.0 | 17.0 granite |
| 564 | ShC-Q2a-T5  | Q2a | 76.3  | 62  | 1.2  | 1.1  | 1.0 granite  |
| 565 | ShC-Q2a-T5  | Q2a | 76.3  | 63  | 1.6  | 1.0  | 0.7 granite  |
| 566 | ShC-Q2a-T5  | Q2a | 76.3  | 64  | 2.4  | 2.4  | 1.5 granite  |
| 567 | ShC-Q2a-T5  | Q2a | 76.3  | 65  | 1.6  | 1.1  | 0.8 granite  |
| 568 | ShC-Q2a-T5  | Q2a | 76.3  | 66  | 2.0  | 1.1  | 0.6 granite  |
| 569 | ShC-Q2a-T5  | Q2a | 76.3  | 67  | 67.0 | 51.0 | 9.0 granite  |
| 570 | ShC-Q2a-T5  | Q2a | 76.3  | 68  | 1.9  | 1.4  | 1.0 granite  |
| 571 | ShC-Q2a-T5  | Q2a | 76.3  | 69  | 1.6  | 1.0  | 0.8 granite  |
| 572 | ShC-Q2a-T5  | Q2a | 76.3  | 70  | 1.6  | 1.0  | 0.6 granite  |
| 573 | ShC-Q2a-T5  | Q2a | 76.3  | 71  | 2.0  | 1.2  | 0.8 granite  |
| 574 | ShC-Q2a-T5  | Q2a | 76.3  | 72  | 2.2  | 1.5  | 1.1 granite  |
| 575 | ShC-Q2a-T5  | Q2a | 76.3  | 73  | 2.3  | 1.4  | 1.3 granite  |
| 576 | ShC-Q2a-T5  | Q2a | 76.3  | 74  | 2.0  | 1.6  | 1.5 granite  |
| 577 | ShC-Q2a-T5  | Q2a | 76.3  | 75  | 24.0 | 17.0 | 8.0 granite  |
| 578 | ShC-Q2a-T5  | Q2a | 76.3  | 76  | 72.0 | 23.0 | 15.0 granite |
| 579 | ShC-Q2a-T5  | Q2a | 76.3  | 77  | 50.0 | 19.0 | 30.0 granite |
| 580 | ShC-Q2a-T5  | Q2a | 76.3  | 78  | 67.0 | 15.0 | 39.0 granite |
| 581 | ShC-Q2a-T5  | Q2a | 76.3  | 79  | 1.3  | 1.2  | 0.6 granite  |
| 582 | ShC-Q2a-T5  | Q2a | 76.3  | 80  | 1.5  | 1.2  | 0.9 granite  |
| 583 | ShC-Q2a-T5  | Q2a | 76.3  | 81  | 1.6  | 1.4  | 0.9 granite  |
| 584 | ShC-Q2a-T5  | Q2a | 76.3  | 82  | 1.8  | 1.6  | 1.5 granite  |
| 585 | ShC-Q2a-T5  | Q2a | 76.3  | 83  | 1.6  | 1.0  | 1.0 granite  |
| 586 | ShC-Q2a-T5  | Q2a | 76.3  | 84  | 4.9  | 3.5  | 3.0 granite  |
| 587 | ShC-Q2a-T5  | Q2a | 76.3  | 85  | 1.5  | 1.3  | 1.0 granite  |
| 588 | ShC-Q2a-T5  | Q2a | 76.3  | 86  | 44.0 | 23.0 | 23.0 granite |
| 589 | ShC-Q2a-T5  | Q2a | 76.3  | 87  | 26.0 | 12.0 | 6.0 granite  |
| 590 | ShC-Q2a-T5  | Q2a | 76.3  | 88  | 64.0 | 30.0 | 13.0 granite |
| 591 | ShC-Q2a-T5  | Q2a | 76.3  | 89  | 1.8  | 1.3  | 1.1 granite  |
| 592 | ShC-Q2a-T5  | Q2a | 76.3  | 90  | 1.3  | 1.2  | 0.8 granite  |
| 593 | ShC-Q2a-T5  | Q2a | 76.3  | 91  | 1.1  | 1.0  | 0.7 granite  |
| 594 | ShC-Q2a-T5  | Q2a | 76.3  | 92  | 1.4  | 1.2  | 0.6 granite  |
| 595 | ShC-Q2a-T5  | Q2a | 76.3  | 93  | 2.0  | 1.4  | 1.0 granite  |
| 596 | ShC-Q2a-T5  | Q2a | 76.3  | 94  | 1.8  | 1.5  | 0.8 granite  |
| 597 | ShC-Q2a-T5  | Q2a | 76.3  | 95  | 1.4  | 1.2  | 0.9 granite  |
| 598 | ShC-Q2a-T5  | Q2a | 76.3  | 96  | 2.5  | 1.5  | 1.2 granite  |
| 599 | ShC-Q2a-T5  | Q2a | 76.3  | 97  | 1.8  | 1.5  | 0.8 granite  |
| 600 | ShC-Q2a-T5  | Q2a | 76.3  | 98  | 1.7  | 1.4  | 1.1 granite  |
| 601 | ShC-Q2a-T5  | Q2a | 76.3  | 99  | 1.3  | 0.8  | 0.8 granite  |
| 602 | ShC-Q2a-T5  | Q2a | 76.3  | 100 | 1.6  | 1.3  | 0.9 granite  |
| 603 | ShC-Q1-3-T1 | Q1  | 117.3 | 1   | 1.5  | 1.4  | 0.5 granite  |
| 604 | ShC-Q1-3-T1 | Q1  | 117.3 | 2   | 1.6  | 1.0  | 0.6 granite  |
| 605 | ShC-Q1-3-T1 | Q1  | 117.3 | 3   | 1.8  | 1.2  | 0.6 granite  |
| 606 | ShC-Q1-3-T1 | Q1  | 117.3 | 4   | 1.9  | 1.5  | 0.6 granite  |
| 607 | ShC-Q1-3-T1 | Q1  | 117.3 | 5   | 2.1  | 0.4  | 1.3 granite  |
| 608 | ShC-Q1-3-T1 | Q1  | 117.3 | 6   | 2.0  | 1.3  | 0.7 granite  |

|     |             |    |       |    |      |      |              |
|-----|-------------|----|-------|----|------|------|--------------|
| 609 | ShC-Q1-3-T1 | Q1 | 117.3 | 7  | 5.8  | 3.0  | 2.9 granite  |
| 610 | ShC-Q1-3-T1 | Q1 | 117.3 | 8  | 1.6  | 1.0  | 0.5 granite  |
| 611 | ShC-Q1-3-T1 | Q1 | 117.3 | 9  | 2.5  | 1.4  | 1.0 granite  |
| 612 | ShC-Q1-3-T1 | Q1 | 117.3 | 10 | 2.0  | 1.4  | 1.0 granite  |
| 613 | ShC-Q1-3-T1 | Q1 | 117.3 | 11 | 2.2  | 1.8  | 0.9 granite  |
| 614 | ShC-Q1-3-T1 | Q1 | 117.3 | 12 | 1.4  | 1.0  | 1.0 granite  |
| 615 | ShC-Q1-3-T1 | Q1 | 117.3 | 13 | 1.3  | 0.9  | 0.5 granite  |
| 616 | ShC-Q1-3-T1 | Q1 | 117.3 | 14 | 1.2  | 1.1  | 0.6 granite  |
| 617 | ShC-Q1-3-T1 | Q1 | 117.3 | 15 | 2.7  | 1.4  | 0.3 granite  |
| 618 | ShC-Q1-3-T1 | Q1 | 117.3 | 16 | 1.8  | 0.9  | 0.6 granite  |
| 619 | ShC-Q1-3-T1 | Q1 | 117.3 | 17 | 1.1  | 1.1  | 0.5 granite  |
| 620 | ShC-Q1-3-T1 | Q1 | 117.3 | 18 | 1.5  | 1.2  | 1.0 granite  |
| 621 | ShC-Q1-3-T1 | Q1 | 117.3 | 19 | 1.2  | 1.0  | 0.5 granite  |
| 622 | ShC-Q1-3-T1 | Q1 | 117.3 | 20 | 1.1  | 1.0  | 0.4 granite  |
| 623 | ShC-Q1-3-T1 | Q1 | 117.3 | 21 | 1.9  | 1.6  | 0.9 granite  |
| 624 | ShC-Q1-3-T1 | Q1 | 117.3 | 22 | 2.0  | 1.7  | 1.3 granite  |
| 625 | ShC-Q1-3-T1 | Q1 | 117.3 | 23 | 1.1  | 1.0  | 0.4 granite  |
| 626 | ShC-Q1-3-T1 | Q1 | 117.3 | 24 | 2.0  | 1.6  | 0.7 granite  |
| 627 | ShC-Q1-3-T1 | Q1 | 117.3 | 25 | 1.3  | 0.9  | 0.5 granite  |
| 628 | ShC-Q1-5-T1 | Q1 | 117.3 | 26 | 1.2  | 1.0  | 0.6 granite  |
| 629 | ShC-Q1-5-T1 | Q1 | 117.3 | 27 | 2.6  | 1.4  | 1.2 granite  |
| 630 | ShC-Q1-5-T1 | Q1 | 117.3 | 28 | 1.6  | 0.9  | 0.6 granite  |
| 631 | ShC-Q1-5-T1 | Q1 | 117.3 | 29 | 1.6  | 1.1  | 0.6 granite  |
| 632 | ShC-Q1-5-T1 | Q1 | 117.3 | 30 | 1.7  | 1.1  | 1.1 granite  |
| 633 | ShC-Q1-5-T1 | Q1 | 117.3 | 31 | 1.4  | 1.1  | 0.8 granite  |
| 634 | ShC-Q1-5-T1 | Q1 | 117.3 | 32 | 1.8  | 1.1  | 0.7 granite  |
| 635 | ShC-Q1-5-T1 | Q1 | 117.3 | 33 | 1.2  | 0.9  | 0.6 granite  |
| 636 | ShC-Q1-5-T1 | Q1 | 117.3 | 34 | 1.3  | 1.2  | 0.9 granite  |
| 637 | ShC-Q1-5-T1 | Q1 | 117.3 | 35 | 1.2  | 0.7  | 0.6 granite  |
| 638 | ShC-Q1-5-T1 | Q1 | 117.3 | 36 | 1.5  | 1.3  | 0.9 granite  |
| 639 | ShC-Q1-5-T1 | Q1 | 117.3 | 37 | 2.1  | 1.8  | 1.5 granite  |
| 640 | ShC-Q1-5-T1 | Q1 | 117.3 | 38 | 2.3  | 1.5  | 0.6 granite  |
| 641 | ShC-Q1-5-T1 | Q1 | 117.3 | 39 | 2.3  | 1.5  | 1.5 granite  |
| 642 | ShC-Q1-5-T1 | Q1 | 117.3 | 40 | 1.8  | 1.1  | 0.8 granite  |
| 643 | ShC-Q1-5-T1 | Q1 | 117.3 | 41 | 1.3  | 1.0  | 0.9 granite  |
| 644 | ShC-Q1-5-T1 | Q1 | 117.3 | 42 | 1.2  | 1.0  | 0.6 granite  |
| 645 | ShC-Q1-5-T1 | Q1 | 117.3 | 43 | 2.6  | 1.7  | 1.4 granite  |
| 646 | ShC-Q1-5-T1 | Q1 | 117.3 | 44 | 1.1  | 1.1  | 0.8 granite  |
| 647 | ShC-Q1-5-T1 | Q1 | 117.3 | 45 | 1.2  | 1.0  | 0.4 granite  |
| 648 | ShC-Q1-5-T1 | Q1 | 117.3 | 46 | 1.3  | 1.2  | 0.8 granite  |
| 649 | ShC-Q1-5-T1 | Q1 | 117.3 | 47 | 1.4  | 1.0  | 0.7 granite  |
| 650 | ShC-Q1-5-T1 | Q1 | 117.3 | 48 | 1.8  | 1.6  | 0.9 granite  |
| 651 | ShC-Q1-5-T1 | Q1 | 117.3 | 49 | 29.0 | 18.0 | 11.0 granite |
| 652 | ShC-Q1-5-T1 | Q1 | 117.3 | 50 | 1.1  | 1.0  | 0.7 granite  |
| 653 | ShC-Q1-4-T1 | Q1 | 117.3 | 51 | 1.6  | 1.2  | 0.6 granite  |
| 654 | ShC-Q1-4-T1 | Q1 | 117.3 | 52 | 1.3  | 1.2  | 0.6 granite  |
| 655 | ShC-Q1-4-T1 | Q1 | 117.3 | 53 | 2.4  | 1.9  | 0.8 granite  |

|     |             |    |       |     |      |      |              |
|-----|-------------|----|-------|-----|------|------|--------------|
| 656 | ShC-Q1-4-T1 | Q1 | 117.3 | 54  | 1.4  | 1.0  | 0.6 granite  |
| 657 | ShC-Q1-4-T1 | Q1 | 117.3 | 55  | 1.1  | 0.9  | 0.4 granite  |
| 658 | ShC-Q1-4-T1 | Q1 | 117.3 | 56  | 1.3  | 1.0  | 0.8 granite  |
| 659 | ShC-Q1-4-T1 | Q1 | 117.3 | 57  | 1.2  | 1.0  | 0.7 granite  |
| 660 | ShC-Q1-4-T1 | Q1 | 117.3 | 58  | 3.1  | 2.8  | 1.2 granite  |
| 661 | ShC-Q1-4-T1 | Q1 | 117.3 | 59  | 55.0 | 36.0 | 11.0 granite |
| 662 | ShC-Q1-4-T1 | Q1 | 117.3 | 60  | 1.5  | 0.8  | 0.7 granite  |
| 663 | ShC-Q1-4-T1 | Q1 | 117.3 | 61  | 38.0 | 21.0 | 13.0 granite |
| 664 | ShC-Q1-4-T1 | Q1 | 117.3 | 62  | 1.4  | 1.0  | 0.6 granite  |
| 665 | ShC-Q1-4-T1 | Q1 | 117.3 | 63  | 2.0  | 1.5  | 0.9 granite  |
| 666 | ShC-Q1-4-T1 | Q1 | 117.3 | 64  | 2.0  | 1.5  | 0.9 granite  |
| 667 | ShC-Q1-4-T1 | Q1 | 117.3 | 65  | 2.0  | 1.3  | 0.9 granite  |
| 668 | ShC-Q1-4-T1 | Q1 | 117.3 | 66  | 2.1  | 1.0  | 0.8 granite  |
| 669 | ShC-Q1-4-T1 | Q1 | 117.3 | 67  | 1.5  | 0.8  | 0.5 granite  |
| 670 | ShC-Q1-4-T1 | Q1 | 117.3 | 68  | 1.5  | 1.0  | 0.6 granite  |
| 671 | ShC-Q1-4-T1 | Q1 | 117.3 | 69  | 2.2  | 1.5  | 1.0 granite  |
| 672 | ShC-Q1-4-T1 | Q1 | 117.3 | 70  | 1.8  | 1.5  | 1.1 granite  |
| 673 | ShC-Q1-4-T1 | Q1 | 117.3 | 71  | 1.7  | 1.2  | 0.6 granite  |
| 674 | ShC-Q1-4-T1 | Q1 | 117.3 | 72  | 2.3  | 2.0  | 1.1 granite  |
| 675 | ShC-Q1-4-T1 | Q1 | 117.3 | 73  | 2.1  | 1.6  | 0.7 granite  |
| 676 | ShC-Q1-4-T1 | Q1 | 117.3 | 74  | 2.2  | 1.5  | 1.4 granite  |
| 677 | ShC-Q1-4-T1 | Q1 | 117.3 | 75  | 2.3  | 1.9  | 1.0 granite  |
| 678 | ShC-Q1-2-T1 | Q1 | 117.3 | 76  | 2.2  | 1.9  | 0.2 granite  |
| 679 | ShC-Q1-2-T1 | Q1 | 117.3 | 77  | 1.2  | 1.1  | 0.6 granite  |
| 680 | ShC-Q1-2-T1 | Q1 | 117.3 | 78  | 1.3  | 1.0  | 0.7 granite  |
| 681 | ShC-Q1-2-T1 | Q1 | 117.3 | 79  | 1.5  | 1.4  | 0.5 granite  |
| 682 | ShC-Q1-2-T1 | Q1 | 117.3 | 80  | 1.9  | 1.3  | 1.2 granite  |
| 683 | ShC-Q1-2-T1 | Q1 | 117.3 | 81  | 2.5  | 2.0  | 1.1 granite  |
| 684 | ShC-Q1-2-T1 | Q1 | 117.3 | 82  | 1.2  | 1.1  | 0.7 granite  |
| 685 | ShC-Q1-2-T1 | Q1 | 117.3 | 83  | 3.4  | 2.7  | 1.1 granite  |
| 686 | ShC-Q1-2-T1 | Q1 | 117.3 | 84  | 1.2  | 1.0  | 0.7 granite  |
| 687 | ShC-Q1-2-T1 | Q1 | 117.3 | 85  | 38.0 | 30.0 | 6.0 granite  |
| 688 | ShC-Q1-2-T1 | Q1 | 117.3 | 86  | 1.2  | 1.0  | 0.6 granite  |
| 689 | ShC-Q1-2-T1 | Q1 | 117.3 | 87  | 1.4  | 1.1  | 0.6 granite  |
| 690 | ShC-Q1-2-T1 | Q1 | 117.3 | 88  | 1.4  | 0.7  | 0.6 granite  |
| 691 | ShC-Q1-2-T1 | Q1 | 117.3 | 89  | 1.1  | 0.8  | 0.3 granite  |
| 692 | ShC-Q1-2-T1 | Q1 | 117.3 | 90  | 1.4  | 1.4  | 1.2 granite  |
| 693 | ShC-Q1-2-T1 | Q1 | 117.3 | 91  | 1.4  | 0.8  | 0.4 granite  |
| 694 | ShC-Q1-2-T1 | Q1 | 117.3 | 92  | 1.3  | 0.8  | 0.6 granite  |
| 695 | ShC-Q1-2-T1 | Q1 | 117.3 | 93  | 2.5  | 2.0  | 1.0 granite  |
| 696 | ShC-Q1-2-T1 | Q1 | 117.3 | 94  | 94.0 | 62.0 | 22.0 granite |
| 697 | ShC-Q1-2-T1 | Q1 | 117.3 | 95  | 2.1  | 1.5  | 1.2 granite  |
| 698 | ShC-Q1-2-T1 | Q1 | 117.3 | 96  | 1.0  | 1.0  | 0.4 granite  |
| 699 | ShC-Q1-2-T1 | Q1 | 117.3 | 97  | 1.1  | 1.0  | 0.6 granite  |
| 700 | ShC-Q1-2-T1 | Q1 | 117.3 | 98  | 1.2  | 1.1  | 0.5 granite  |
| 701 | ShC-Q1-2-T1 | Q1 | 117.3 | 99  | 1.3  | 1.2  | 0.5 granite  |
| 702 | ShC-Q1-2-T1 | Q1 | 117.3 | 100 | 1.0  | 0.9  | 0.8 granite  |

|     |           |        |   |    |      |      |             |
|-----|-----------|--------|---|----|------|------|-------------|
| 703 | PrM-Q7-T1 | PrM-Q7 | 1 | 1  | 5.8  | 3.8  | 1.5 granite |
| 704 | PrM-Q7-T1 | PrM-Q7 | 1 | 2  | 3.5  | 1.6  | 1.2 granite |
| 705 | PrM-Q7-T1 | PrM-Q7 | 1 | 3  | 1.8  | 1.1  | 0.6 granite |
| 706 | PrM-Q7-T1 | PrM-Q7 | 1 | 4  | 7.5  | 4.2  | 2.6 granite |
| 707 | PrM-Q7-T1 | PrM-Q7 | 1 | 5  | 10.5 | 9.3  | 4.6 granite |
| 708 | PrM-Q7-T1 | PrM-Q7 | 1 | 6  | 1.8  | 1.3  | 0.4 granite |
| 709 | PrM-Q7-T1 | PrM-Q7 | 1 | 7  | 6.0  | 3.2  | 2.2 granite |
| 710 | PrM-Q7-T1 | PrM-Q7 | 1 | 8  | 1.2  | 1.1  | 0.5 granite |
| 711 | PrM-Q7-T1 | PrM-Q7 | 1 | 9  | 1.7  | 0.9  | 0.7 granite |
| 712 | PrM-Q7-T1 | PrM-Q7 | 1 | 10 | 2.3  | 2.3  | 2.1 granite |
| 713 | PrM-Q7-T1 | PrM-Q7 | 1 | 11 | 9.0  | 6.5  | 5.3 granite |
| 714 | PrM-Q7-T1 | PrM-Q7 | 1 | 12 | 6.2  | 5.5  | 2.0 granite |
| 715 | PrM-Q7-T1 | PrM-Q7 | 1 | 13 | 4.5  | 3.5  | 2.8 granite |
| 716 | PrM-Q7-T1 | PrM-Q7 | 1 | 14 | 13.0 | 12.0 | 3.0 granite |
| 717 | PrM-Q7-T1 | PrM-Q7 | 1 | 15 | 9.8  | 6.0  | 5.5 granite |
| 718 | PrM-Q7-T1 | PrM-Q7 | 1 | 16 | 2.3  | 1.9  | 1.8 granite |
| 719 | PrM-Q7-T1 | PrM-Q7 | 1 | 17 | 3.7  | 3.0  | 1.3 granite |
| 720 | PrM-Q7-T1 | PrM-Q7 | 1 | 18 | 3.5  | 2.5  | 1.4 granite |
| 721 | PrM-Q7-T1 | PrM-Q7 | 1 | 19 | 1.9  | 1.0  | 0.9 granite |
| 722 | PrM-Q7-T1 | PrM-Q7 | 1 | 20 | 19.0 | 15.0 | 9.0 granite |
| 723 | PrM-Q7-T1 | PrM-Q7 | 1 | 21 | 1.8  | 1.1  | 0.7 granite |
| 724 | PrM-Q7-T1 | PrM-Q7 | 1 | 22 | 2.5  | 2.2  | 1.2 granite |
| 725 | PrM-Q7-T1 | PrM-Q7 | 1 | 23 | 1.8  | 1.6  | 0.7 granite |
| 726 | PrM-Q7-T1 | PrM-Q7 | 1 | 24 | 4.3  | 3.5  | 3.0 granite |
| 727 | PrM-Q7-T1 | PrM-Q7 | 1 | 25 | 1.2  | 1.1  | 1.0 granite |
| 728 | PrM-Q7-T1 | PrM-Q7 | 1 | 26 | 2.1  | 1.2  | 0.3 granite |
| 729 | PrM-Q7-T1 | PrM-Q7 | 1 | 27 | 12.0 | 5.0  | 5.0 granite |
| 730 | PrM-Q7-T1 | PrM-Q7 | 1 | 28 | 9.0  | 5.0  | 5.0 granite |
| 731 | PrM-Q7-T1 | PrM-Q7 | 1 | 29 | 1.7  | 1.2  | 0.9 granite |
| 732 | PrM-Q7-T1 | PrM-Q7 | 1 | 30 | 1.5  | 1.2  | 1.0 granite |
| 733 | PrM-Q7-T1 | PrM-Q7 | 1 | 31 | 10.0 | 7.5  | 7.5 granite |
| 734 | PrM-Q7-T1 | PrM-Q7 | 1 | 32 | 2.2  | 2.0  | 1.4 granite |
| 735 | PrM-Q7-T1 | PrM-Q7 | 1 | 33 | 6.0  | 3.5  | 2.5 granite |
| 736 | PrM-Q7-T1 | PrM-Q7 | 1 | 34 | 10.0 | 7.0  | 6.0 granite |
| 737 | PrM-Q7-T1 | PrM-Q7 | 1 | 35 | 2.0  | 1.5  | 1.2 granite |
| 738 | PrM-Q7-T1 | PrM-Q7 | 1 | 36 | 2.5  | 2.2  | 2.0 granite |
| 739 | PrM-Q7-T1 | PrM-Q7 | 1 | 37 | 4.0  | 3.2  | 1.1 granite |
| 740 | PrM-Q7-T1 | PrM-Q7 | 1 | 38 | 5.2  | 2.5  | 2.2 granite |
| 741 | PrM-Q7-T1 | PrM-Q7 | 1 | 39 | 4.2  | 3.7  | 2.7 granite |
| 742 | PrM-Q7-T1 | PrM-Q7 | 1 | 40 | 9.2  | 6.7  | 5.0 granite |
| 743 | PrM-Q7-T2 | PrM-Q7 | 1 | 41 | 2.6  | 1.3  | 1.0 granite |
| 744 | PrM-Q7-T2 | PrM-Q7 | 1 | 42 | 4.3  | 2.6  | 1.1 granite |
| 745 | PrM-Q7-T2 | PrM-Q7 | 1 | 43 | 3.1  | 2.0  | 1.1 granite |
| 746 | PrM-Q7-T2 | PrM-Q7 | 1 | 44 | 14.3 | 11.0 | 4.0 granite |
| 747 | PrM-Q7-T2 | PrM-Q7 | 1 | 45 | 1.3  | 1.0  | 0.5 granite |
| 748 | PrM-Q7-T2 | PrM-Q7 | 1 | 46 | 17.0 | 12.0 | 9.0 granite |
| 749 | PrM-Q7-T2 | PrM-Q7 | 1 | 47 | 4.0  | 3.0  | 1.3 granite |

|     |           |        |   |    |      |      |              |
|-----|-----------|--------|---|----|------|------|--------------|
| 750 | PrM-Q7-T2 | PrM-Q7 | 1 | 48 | 2.5  | 2.0  | 1.0 granite  |
| 751 | PrM-Q7-T2 | PrM-Q7 | 1 | 49 | 22.0 | 16.0 | 7.5 granite  |
| 752 | PrM-Q7-T2 | PrM-Q7 | 1 | 50 | 5.6  | 5.1  | 1.2 granite  |
| 753 | PrM-Q7-T2 | PrM-Q7 | 1 | 51 | 1.8  | 1.8  | 1.1 granite  |
| 754 | PrM-Q7-T2 | PrM-Q7 | 1 | 52 | 10.0 | 5.5  | 5.0 granite  |
| 755 | PrM-Q7-T2 | PrM-Q7 | 1 | 53 | 24.5 | 18.0 | 12.0 granite |
| 756 | PrM-Q7-T2 | PrM-Q7 | 1 | 54 | 3.7  | 2.0  | 1.4 granite  |
| 757 | PrM-Q7-T2 | PrM-Q7 | 1 | 55 | 37.0 | 23.0 | 10.0 granite |
| 758 | PrM-Q7-T2 | PrM-Q7 | 1 | 56 | 2.1  | 1.5  | 0.7 granite  |
| 759 | PrM-Q7-T2 | PrM-Q7 | 1 | 57 | 15.5 | 9.0  | 12.0 granite |
| 760 | PrM-Q7-T2 | PrM-Q7 | 1 | 58 | 1.2  | 1.2  | 1.0 granite  |
| 761 | PrM-Q7-T2 | PrM-Q7 | 1 | 59 | 16.5 | 15.0 | 11.0 granite |
| 762 | PrM-Q7-T2 | PrM-Q7 | 1 | 60 | 15.0 | 13.0 | 8.0 granite  |
| 763 | PrM-Q7-T2 | PrM-Q7 | 1 | 61 | 21.0 | 13.0 | 7.0 granite  |
| 764 | PrM-Q7-T2 | PrM-Q7 | 1 | 62 | 4.5  | 3.5  | 1.5 granite  |
| 765 | PrM-Q7-T2 | PrM-Q7 | 1 | 63 | 2.4  | 1.8  | 0.5 granite  |
| 766 | PrM-Q7-T2 | PrM-Q7 | 1 | 64 | 1.2  | 1.7  | 0.8 granite  |
| 767 | PrM-Q7-T2 | PrM-Q7 | 1 | 65 | 3.3  | 3.0  | 1.8 granite  |
| 768 | PrM-Q7-T2 | PrM-Q7 | 1 | 66 | 7.5  | 5.0  | 5.5 granite  |
| 769 | PrM-Q7-T2 | PrM-Q7 | 1 | 67 | 2.0  | 1.7  | 1.5 granite  |
| 770 | PrM-Q7-T2 | PrM-Q7 | 1 | 68 | 12.5 | 8.5  | 8.0 granite  |
| 771 | PrM-Q7-T2 | PrM-Q7 | 1 | 69 | 1.9  | 1.3  | 0.5 granite  |
| 772 | PrM-Q7-T2 | PrM-Q7 | 1 | 70 | 20.0 | 14.0 | 11.0 granite |
| 773 | PrM-Q7-T2 | PrM-Q7 | 1 | 71 | 25.0 | 18.0 | 12.0 granite |
| 774 | PrM-Q7-T3 | PrM-Q7 | 1 | 72 | 10.5 | 7.0  | 5.3 granite  |
| 775 | PrM-Q7-T3 | PrM-Q7 | 1 | 73 | 9.5  | 6.2  | 4.3 granite  |
| 776 | PrM-Q7-T3 | PrM-Q7 | 1 | 74 | 7.2  | 4.4  | 2.7 granite  |
| 777 | PrM-Q7-T3 | PrM-Q7 | 1 | 75 | 4.8  | 2.7  | 2.5 granite  |
| 778 | PrM-Q7-T3 | PrM-Q7 | 1 | 76 | 4.6  | 2.8  | 2.4 granite  |
| 779 | PrM-Q7-T3 | PrM-Q7 | 1 | 77 | 9.8  | 8.5  | 2.0 granite  |
| 780 | PrM-Q7-T3 | PrM-Q7 | 1 | 78 | 6.0  | 4.2  | 1.9 granite  |
| 781 | PrM-Q7-T3 | PrM-Q7 | 1 | 79 | 3.0  | 1.5  | 1.4 granite  |
| 782 | PrM-Q7-T3 | PrM-Q7 | 1 | 80 | 4.0  | 3.3  | 2.0 granite  |
| 783 | PrM-Q7-T3 | PrM-Q7 | 1 | 81 | 14.0 | 11.0 | 11.0 granite |
| 784 | PrM-Q7-T3 | PrM-Q7 | 1 | 82 | 9.7  | 7.6  | 4.8 granite  |
| 785 | PrM-Q7-T3 | PrM-Q7 | 1 | 83 | 14.0 | 14.0 | 9.5 granite  |
| 786 | PrM-Q7-T3 | PrM-Q7 | 1 | 84 | 8.0  | 3.6  | 5.1 granite  |
| 787 | PrM-Q7-T3 | PrM-Q7 | 1 | 85 | 8.8  | 3.0  | 1.4 granite  |
| 788 | PrM-Q7-T3 | PrM-Q7 | 1 | 86 | 1.3  | 1.1  | 0.8 granite  |
| 789 | PrM-Q7-T3 | PrM-Q7 | 1 | 87 | 1.3  | 1.1  | 0.8 granite  |
| 790 | PrM-Q7-T3 | PrM-Q7 | 1 | 88 | 10.0 | 9.5  | 9.0 granite  |
| 791 | PrM-Q7-T3 | PrM-Q7 | 1 | 89 | 2.3  | 2.0  | 1.9 granite  |
| 792 | PrM-Q7-T3 | PrM-Q7 | 1 | 90 | 1.8  | 1.1  | 0.7 granite  |
| 793 | PrM-Q7-T3 | PrM-Q7 | 1 | 91 | 13.0 | 8.4  | 8.0 granite  |
| 794 | PrM-Q7-T3 | PrM-Q7 | 1 | 92 | 18.0 | 1.0  | 1.0 granite  |
| 795 | PrM-Q7-T3 | PrM-Q7 | 1 | 93 | 7.0  | 3.6  | 2.5 granite  |
| 796 | PrM-Q7-T3 | PrM-Q7 | 1 | 94 | 5.5  | 3.0  | 2.8 granite  |

|     |           |        |    |     |      |      |              |
|-----|-----------|--------|----|-----|------|------|--------------|
| 797 | PrM-Q7-T3 | PrM-Q7 | 1  | 95  | 12.5 | 11.0 | 9.5 granite  |
| 798 | PrM-Q7-T3 | PrM-Q7 | 1  | 96  | 7.2  | 6.5  | 6.2 granite  |
| 799 | PrM-Q7-T3 | PrM-Q7 | 1  | 97  | 20.5 | 15.0 | 8.0 granite  |
| 800 | PrM-Q7-T3 | PrM-Q7 | 1  | 98  | 2.0  | 1.1  | 0.8 granite  |
| 801 | PrM-Q7-T3 | PrM-Q7 | 1  | 99  | 4.0  | 3.3  | 2.5 granite  |
| 802 | PrM-Q7-T3 | PrM-Q7 | 1  | 100 | 9.0  | 5.5  | 4.8 granite  |
| 803 | PrM-Q5-T1 | PrM-Q5 | 10 | 1   | 2.6  | 2.0  | 1.6 granite  |
| 804 | PrM-Q5-T1 | PrM-Q5 | 10 | 2   | 1.3  | 1.1  | 0.9 granite  |
| 805 | PrM-Q5-T1 | PrM-Q5 | 10 | 3   | 2.7  | 1.8  | 1.7 granite  |
| 806 | PrM-Q5-T1 | PrM-Q5 | 10 | 4   | 5.8  | 3.2  | 0.9 granite  |
| 807 | PrM-Q5-T1 | PrM-Q5 | 10 | 5   | 1.7  | 1.4  | 1.0 granite  |
| 808 | PrM-Q5-T1 | PrM-Q5 | 10 | 6   | 10.1 | 10.0 | 6.5 granite  |
| 809 | PrM-Q5-T1 | PrM-Q5 | 10 | 7   | 2.3  | 2.0  | 1.5 granite  |
| 810 | PrM-Q5-T1 | PrM-Q5 | 10 | 8   | 1.5  | 1.5  | 0.4 granite  |
| 811 | PrM-Q5-T1 | PrM-Q5 | 10 | 9   | 10.2 | 8.0  | 6.0 granite  |
| 812 | PrM-Q5-T1 | PrM-Q5 | 10 | 10  | 1.8  | 1.2  | 0.8 granite  |
| 813 | PrM-Q5-T1 | PrM-Q5 | 10 | 11  | 1.8  | 1.3  | 0.6 granite  |
| 814 | PrM-Q5-T1 | PrM-Q5 | 10 | 12  | 11.0 | 8.0  | 7.2 granite  |
| 815 | PrM-Q5-T1 | PrM-Q5 | 10 | 13  | 23.5 | 16.0 | 6.0 granite  |
| 816 | PrM-Q5-T1 | PrM-Q5 | 10 | 14  | 5.5  | 2.8  | 2.3 granite  |
| 817 | PrM-Q5-T1 | PrM-Q5 | 10 | 15  | 3.5  | 2.2  | 1.8 granite  |
| 818 | PrM-Q5-T1 | PrM-Q5 | 10 | 16  | 16.0 | 16.0 | 4.0 granite  |
| 819 | PrM-Q5-T1 | PrM-Q5 | 10 | 17  | 18.5 | 18.0 | 17.0 granite |
| 820 | PrM-Q5-T1 | PrM-Q5 | 10 | 18  | 12.0 | 11.0 | 5.0 granite  |
| 821 | PrM-Q5-T1 | PrM-Q5 | 10 | 19  | 3.3  | 3.0  | 2.2 granite  |
| 822 | PrM-Q5-T1 | PrM-Q5 | 10 | 20  | 3.8  | 2.2  | 2.0 granite  |
| 823 | PrM-Q5-T1 | PrM-Q5 | 10 | 21  | 4.2  | 3.5  | 1.1 granite  |
| 824 | PrM-Q5-T1 | PrM-Q5 | 10 | 22  | 6.5  | 5.3  | 2.5 granite  |
| 825 | PrM-Q5-T1 | PrM-Q5 | 10 | 23  | 7.1  | 5.0  | 2.5 granite  |
| 826 | PrM-Q5-T1 | PrM-Q5 | 10 | 24  | 13.0 | 8.5  | 6.0 granite  |
| 827 | PrM-Q5-T1 | PrM-Q5 | 10 | 25  | 14.0 | 10.0 | 8.0 granite  |
| 828 | PrM-Q5-T1 | PrM-Q5 | 10 | 26  | 14.5 | 10.0 | 5.0 granite  |
| 829 | PrM-Q5-T1 | PrM-Q5 | 10 | 27  | 2.0  | 2.0  | 2.0 granite  |
| 830 | PrM-Q5-T1 | PrM-Q5 | 10 | 28  | 7.3  | 4.1  | 3.5 granite  |
| 831 | PrM-Q5-T1 | PrM-Q5 | 10 | 28  | 24.0 | 22.0 | 15.0 granite |
| 832 | PrM-Q5-T1 | PrM-Q5 | 10 | 29  | 1.4  | 1.4  | 0.7 granite  |
| 833 | PrM-Q5-T1 | PrM-Q5 | 10 | 30  | 2.3  | 1.1  | 0.7 granite  |
| 834 | PrM-Q5-T1 | PrM-Q5 | 10 | 31  | 9.0  | 6.0  | 5.3 granite  |
| 835 | PrM-Q5-T1 | PrM-Q5 | 10 | 32  | 8.3  | 5.5  | 3.0 granite  |
| 836 | PrM-Q5-T1 | PrM-Q5 | 10 | 33  | 24.0 | 20.0 | 10.0 granite |
| 837 | PrM-Q5-T1 | PrM-Q5 | 10 | 34  | 22.0 | 13.0 | 8.0 granite  |
| 838 | PrM-Q5-T1 | PrM-Q5 | 10 | 35  | 4.5  | 1.5  | 1.4 granite  |
| 839 | PrM-Q5-T1 | PrM-Q5 | 10 | 36  | 25.0 | 22.0 | 16.0 granite |
| 840 | PrM-Q5-T1 | PrM-Q5 | 10 | 37  | 21.0 | 18.0 | 8.0 granite  |
| 841 | PrM-Q5-T1 | PrM-Q5 | 10 | 38  | 1.3  | 1.0  | 0.6 granite  |
| 842 | PrM-Q5-T1 | PrM-Q5 | 10 | 39  | 11.0 | 8.3  | 6.0 granite  |
| 843 | PrM-Q5-T1 | PrM-Q5 | 10 | 40  | 1.5  | 1.4  | 1.0 granite  |

|     |           |        |    |    |      |      |              |
|-----|-----------|--------|----|----|------|------|--------------|
| 844 | PrM-Q5-T2 | PrM-Q5 | 10 | 41 | 2.7  | 2.3  | 1.3 granite  |
| 845 | PrM-Q5-T2 | PrM-Q5 | 10 | 42 | 33.5 | 21.0 | 15.0 granite |
| 846 | PrM-Q5-T2 | PrM-Q5 | 10 | 43 | 1.7  | 1.2  | 0.7 granite  |
| 847 | PrM-Q5-T2 | PrM-Q5 | 10 | 44 | 7.0  | 5.2  | 3.2 granite  |
| 848 | PrM-Q5-T2 | PrM-Q5 | 10 | 45 | 5.0  | 3.5  | 2.0 granite  |
| 849 | PrM-Q5-T2 | PrM-Q5 | 10 | 46 | 12.7 | 11.0 | 8.5 granite  |
| 850 | PrM-Q5-T2 | PrM-Q5 | 10 | 47 | 3.2  | 2.2  | 1.2 granite  |
| 851 | PrM-Q5-T2 | PrM-Q5 | 10 | 48 | 8.5  | 8.5  | 6.8 granite  |
| 852 | PrM-Q5-T2 | PrM-Q5 | 10 | 49 | 24.0 | 20.0 | 9.0 granite  |
| 853 | PrM-Q5-T2 | PrM-Q5 | 10 | 50 | 4.0  | 2.0  | 1.9 granite  |
| 854 | PrM-Q5-T2 | PrM-Q5 | 10 | 51 | 36.0 | 26.0 | 15.0 granite |
| 855 | PrM-Q5-T2 | PrM-Q5 | 10 | 52 | 3.5  | 2.2  | 0.7 granite  |
| 856 | PrM-Q5-T2 | PrM-Q5 | 10 | 53 | 5.2  | 3.7  | 1.7 granite  |
| 857 | PrM-Q5-T2 | PrM-Q5 | 10 | 54 | 6.8  | 4.3  | 3.3 granite  |
| 858 | PrM-Q5-T2 | PrM-Q5 | 10 | 55 | 11.8 | 5.0  | 2.6 granite  |
| 859 | PrM-Q5-T2 | PrM-Q5 | 10 | 56 | 1.3  | 1.0  | 0.7 granite  |
| 860 | PrM-Q5-T2 | PrM-Q5 | 10 | 57 | 14.5 | 7.8  | 4.0 granite  |
| 861 | PrM-Q5-T2 | PrM-Q5 | 10 | 58 | 1.2  | 1.2  | 1.0 granite  |
| 862 | PrM-Q5-T2 | PrM-Q5 | 10 | 59 | 2.5  | 1.4  | 0.8 granite  |
| 863 | PrM-Q5-T2 | PrM-Q5 | 10 | 60 | 10.5 | 5.5  | 4.0 granite  |
| 864 | PrM-Q5-T2 | PrM-Q5 | 10 | 61 | 7.0  | 5.4  | 4.8 granite  |
| 865 | PrM-Q5-T2 | PrM-Q5 | 10 | 62 | 14.0 | 7.0  | 7.0 granite  |
| 866 | PrM-Q5-T2 | PrM-Q5 | 10 | 63 | 2.2  | 1.5  | 0.7 granite  |
| 867 | PrM-Q5-T2 | PrM-Q5 | 10 | 64 | 3.0  | 2.3  | 1.4 granite  |
| 868 | PrM-Q5-T2 | PrM-Q5 | 10 | 65 | 3.0  | 1.5  | 1.0 granite  |
| 869 | PrM-Q5-T2 | PrM-Q5 | 10 | 66 | 9.3  | 4.0  | 3.3 granite  |
| 870 | PrM-Q5-T2 | PrM-Q5 | 10 | 67 | 2.8  | 1.6  | 1.4 granite  |
| 871 | PrM-Q5-T2 | PrM-Q5 | 10 | 68 | 2.1  | 1.3  | 1.0 granite  |
| 872 | PrM-Q5-T2 | PrM-Q5 | 10 | 69 | 1.5  | 1.0  | 0.8 granite  |
| 873 | PrM-Q5-T2 | PrM-Q5 | 10 | 70 | 4.8  | 4.2  | 2.2 granite  |
| 874 | PrM-Q5-T2 | PrM-Q5 | 10 | 71 | 12.2 | 4.7  | 3.0 granite  |
| 875 | PrM-Q5-T2 | PrM-Q5 | 10 | 72 | 14.3 | 13.8 | 8.0 granite  |
| 876 | PrM-Q5-T2 | PrM-Q5 | 10 | 73 | 16.3 | 11.0 | 5.0 granite  |
| 877 | PrM-Q5-T2 | PrM-Q5 | 10 | 74 | 25.0 | 16.0 | 13.0 granite |
| 878 | PrM-Q5-T2 | PrM-Q5 | 10 | 75 | 2.2  | 1.8  | 1.7 granite  |
| 879 | PrM-Q5-T2 | PrM-Q5 | 10 | 76 | 24.0 | 16.0 | 15.0 granite |
| 880 | PrM-Q5-T2 | PrM-Q5 | 10 | 77 | 1.6  | 1.1  | 0.9 granite  |
| 881 | PrM-Q5-T2 | PrM-Q5 | 10 | 78 | 29.0 | 26.0 | 7.0 granite  |
| 882 | PrM-Q5-T2 | PrM-Q5 | 10 | 79 | 1.7  | 1.3  | 0.9 granite  |
| 883 | PrM-Q5-T2 | PrM-Q5 | 10 | 80 | 24.0 | 7.0  | 5.0 granite  |
| 884 | PrM-Q5-T2 | PrM-Q5 | 10 | 81 | 1.6  | 1.1  | 1.0 granite  |
| 885 | PrM-Q5-T3 | PrM-Q5 | 10 | 82 | 16.5 | 15.0 | 9.0 granite  |
| 886 | PrM-Q5-T3 | PrM-Q5 | 10 | 83 | 1.7  | 1.6  | 0.7 granite  |
| 887 | PrM-Q5-T3 | PrM-Q5 | 10 | 84 | 2.2  | 1.2  | 0.9 granite  |
| 888 | PrM-Q5-T3 | PrM-Q5 | 10 | 85 | 2.5  | 1.3  | 1.2 granite  |
| 889 | PrM-Q5-T3 | PrM-Q5 | 10 | 86 | 6.0  | 3.5  | 4.1 granite  |
| 890 | PrM-Q5-T3 | PrM-Q5 | 10 | 87 | 1.4  | 1.2  | 1.2 granite  |

|     |           |        |    |     |       |      |              |
|-----|-----------|--------|----|-----|-------|------|--------------|
| 891 | PrM-Q5-T3 | PrM-Q5 | 10 | 88  | 8.3   | 4.6  | 2.5 granite  |
| 892 | PrM-Q5-T3 | PrM-Q5 | 10 | 89  | 12.8  | 3.8  | 4.5 granite  |
| 893 | PrM-Q5-T3 | PrM-Q5 | 10 | 90  | 1.5   | 1.2  | 0.6 granite  |
| 894 | PrM-Q5-T3 | PrM-Q5 | 10 | 91  | 2.2   | 1.1  | 0.8 granite  |
| 895 | PrM-Q5-T3 | PrM-Q5 | 10 | 92  | 9.0   | 4.1  | 3.6 granite  |
| 896 | PrM-Q5-T3 | PrM-Q5 | 10 | 93  | 3.1   | 2.7  | 1.5 granite  |
| 897 | PrM-Q5-T3 | PrM-Q5 | 10 | 94  | 4.7   | 3.8  | 2.2 granite  |
| 898 | PrM-Q5-T3 | PrM-Q5 | 10 | 95  | 9.0   | 6.2  | 5.6 granite  |
| 899 | PrM-Q5-T3 | PrM-Q5 | 10 | 96  | 10.5  | 7.7  | 3.2 granite  |
| 900 | PrM-Q5-T3 | PrM-Q5 | 10 | 97  | 2.6   | 2.2  | 1.0 granite  |
| 901 | PrM-Q5-T3 | PrM-Q5 | 10 | 98  | 12.0  | 11.2 | 8.0 granite  |
| 902 | PrM-Q5-T3 | PrM-Q5 | 10 | 99  | 1.5   | 1.1  | 0.6 granite  |
| 903 | PrM-Q5-T3 | PrM-Q5 | 10 | 100 | 1.7   | 1.3  | 1.0 granite  |
| 904 | PrM-Q6-T1 | PrM-Q6 | 5  | 1   | 30.0  | 12.0 | 5.0 granite  |
| 905 | PrM-Q6-T1 | PrM-Q6 | 5  | 2   | 1.4   | 1.3  | 1.0 granite  |
| 906 | PrM-Q6-T1 | PrM-Q6 | 5  | 3   | 1.4   | 0.8  | 0.7 granite  |
| 907 | PrM-Q6-T1 | PrM-Q6 | 5  | 4   | 20.0  | 14.5 | 8.0 granite  |
| 908 | PrM-Q6-T1 | PrM-Q6 | 5  | 5   | 16.0  | 11.0 | 8.0 granite  |
| 909 | PrM-Q6-T1 | PrM-Q6 | 5  | 6   | 23.0  | 14.0 | 11.0 granite |
| 910 | PrM-Q6-T1 | PrM-Q6 | 5  | 7   | 2.2   | 1.6  | 1.1 granite  |
| 911 | PrM-Q6-T1 | PrM-Q6 | 5  | 8   | 2.5   | 2.2  | 1.5 granite  |
| 912 | PrM-Q6-T1 | PrM-Q6 | 5  | 9   | 1.8   | 1.0  | 0.7 granite  |
| 913 | PrM-Q6-T1 | PrM-Q6 | 5  | 10  | 1.5   | 1.0  | 0.6 granite  |
| 914 | PrM-Q6-T1 | PrM-Q6 | 5  | 11  | 1.7   | 1.2  | 0.5 granite  |
| 915 | PrM-Q6-T1 | PrM-Q6 | 5  | 12  | 2.1   | 1.5  | 0.8 granite  |
| 916 | PrM-Q6-T1 | PrM-Q6 | 5  | 13  | 1.5   | 1.0  | 0.9 granite  |
| 917 | PrM-Q6-T1 | PrM-Q6 | 5  | 14  | 2.1   | 1.2  | 0.4 granite  |
| 918 | PrM-Q6-T1 | PrM-Q6 | 5  | 15  | 70.0  | 53.0 | 19.0 granite |
| 919 | PrM-Q6-T1 | PrM-Q6 | 5  | 16  | 1.7   | 1.1  | 0.4 granite  |
| 920 | PrM-Q6-T1 | PrM-Q6 | 5  | 17  | 1.2   | 1.0  | 0.8 granite  |
| 921 | PrM-Q6-T1 | PrM-Q6 | 5  | 18  | 41.0  | 22.0 | 9.0 granite  |
| 922 | PrM-Q6-T1 | PrM-Q6 | 5  | 19  | 3.2   | 2.0  | 1.0 granite  |
| 923 | PrM-Q6-T1 | PrM-Q6 | 5  | 20  | 31.0  | 12.0 | 8.0 granite  |
| 924 | PrM-Q6-T1 | PrM-Q6 | 5  | 21  | 10.0  | 7.0  | 6.0 granite  |
| 925 | PrM-Q6-T1 | PrM-Q6 | 5  | 22  | 4.0   | 3.0  | 1.2 granite  |
| 926 | PrM-Q6-T1 | PrM-Q6 | 5  | 23  | 10.0  | 9.2  | 9.0 granite  |
| 927 | PrM-Q6-T1 | PrM-Q6 | 5  | 24  | 64.0  | 47.0 | 21.0 granite |
| 928 | PrM-Q6-T1 | PrM-Q6 | 5  | 25  | 1.9   | 1.1  | 0.6 granite  |
| 929 | PrM-Q6-T1 | PrM-Q6 | 5  | 26  | 112.0 | 84.0 | 41.0 granite |
| 930 | PrM-Q6-T1 | PrM-Q6 | 5  | 27  | 1.7   | 1.1  | 0.6 granite  |
| 931 | PrM-Q6-T1 | PrM-Q6 | 5  | 28  | 1.8   | 1.1  | 0.5 granite  |
| 932 | PrM-Q6-T1 | PrM-Q6 | 5  | 29  | 31.0  | 25.0 | 19.0 granite |
| 933 | PrM-Q6-T1 | PrM-Q6 | 5  | 30  | 4.0   | 3.0  | 2.8 granite  |
| 934 | PrM-Q6-T1 | PrM-Q6 | 5  | 31  | 46.0  | 34.0 | 22.0 granite |
| 935 | PrM-Q6-T1 | PrM-Q6 | 5  | 32  | 1.1   | 1.1  | 0.4 granite  |
| 936 | PrM-Q6-T1 | PrM-Q6 | 5  | 33  | 15.0  | 10.3 | 5.5 granite  |
| 937 | PrM-Q6-T1 | PrM-Q6 | 5  | 34  | 2.2   | 1.5  | 1.4 granite  |

|     |           |        |   |    |      |      |              |
|-----|-----------|--------|---|----|------|------|--------------|
| 938 | PrM-Q6-T1 | PrM-Q6 | 5 | 35 | 28.0 | 9.0  | 6.0 granite  |
| 939 | PrM-Q6-T1 | PrM-Q6 | 5 | 36 | 54.0 | 35.0 | 22.0 granite |
| 940 | PrM-Q6-T1 | PrM-Q6 | 5 | 37 | 29.0 | 20.0 | 14.0 granite |
| 941 | PrM-Q6-T1 | PrM-Q6 | 5 | 38 | 32.0 | 25.0 | 9.0 granite  |
| 942 | PrM-Q6-T2 | PrM-Q6 | 5 | 39 | 20.0 | 13.0 | 11.0 granite |
| 943 | PrM-Q6-T2 | PrM-Q6 | 5 | 40 | 41.0 | 37.0 | 20.0 granite |
| 944 | PrM-Q6-T2 | PrM-Q6 | 5 | 41 | 3.8  | 2.8  | 1.3 granite  |
| 945 | PrM-Q6-T2 | PrM-Q6 | 5 | 42 | 1.5  | 1.0  | 0.7 granite  |
| 946 | PrM-Q6-T2 | PrM-Q6 | 5 | 43 | 24.5 | 15.5 | 10.0 granite |
| 947 | PrM-Q6-T2 | PrM-Q6 | 5 | 44 | 35.0 | 26.5 | 16.0 granite |
| 948 | PrM-Q6-T2 | PrM-Q6 | 5 | 45 | 1.3  | 1.1  | 0.8 granite  |
| 949 | PrM-Q6-T2 | PrM-Q6 | 5 | 46 | 3.8  | 2.6  | 1.0 granite  |
| 950 | PrM-Q6-T2 | PrM-Q6 | 5 | 47 | 30.0 | 15.0 | 5.0 granite  |
| 951 | PrM-Q6-T2 | PrM-Q6 | 5 | 48 | 1.2  | 1.1  | 0.8 granite  |
| 952 | PrM-Q6-T2 | PrM-Q6 | 5 | 49 | 2.0  | 1.2  | 1.2 granite  |
| 953 | PrM-Q6-T2 | PrM-Q6 | 5 | 50 | 1.8  | 1.7  | 1.1 granite  |
| 954 | PrM-Q6-T2 | PrM-Q6 | 5 | 51 | 2.5  | 2.0  | 1.0 granite  |
| 955 | PrM-Q6-T2 | PrM-Q6 | 5 | 52 | 16.5 | 9.0  | 8.0 granite  |
| 956 | PrM-Q6-T2 | PrM-Q6 | 5 | 53 | 17.2 | 9.0  | 6.5 granite  |
| 957 | PrM-Q6-T2 | PrM-Q6 | 5 | 54 | 17.0 | 11.0 | 6.0 granite  |
| 958 | PrM-Q6-T2 | PrM-Q6 | 5 | 55 | 4.1  | 2.7  | 2.2 granite  |
| 959 | PrM-Q6-T2 | PrM-Q6 | 5 | 56 | 2.2  | 1.5  | 0.8 granite  |
| 960 | PrM-Q6-T2 | PrM-Q6 | 5 | 57 | 4.9  | 3.5  | 1.3 granite  |
| 961 | PrM-Q6-T2 | PrM-Q6 | 5 | 58 | 4.7  | 2.0  | 1.8 granite  |
| 962 | PrM-Q6-T2 | PrM-Q6 | 5 | 59 | 2.8  | 2.6  | 2.0 granite  |
| 963 | PrM-Q6-T2 | PrM-Q6 | 5 | 60 | 1.2  | 1.0  | 0.7 granite  |
| 964 | PrM-Q6-T2 | PrM-Q6 | 5 | 61 | 17.5 | 13.0 | 4.0 granite  |
| 965 | PrM-Q6-T2 | PrM-Q6 | 5 | 62 | 28.0 | 16.0 | 15.0 granite |
| 966 | PrM-Q6-T2 | PrM-Q6 | 5 | 63 | 1.6  | 1.3  | 0.5 granite  |
| 967 | PrM-Q6-T2 | PrM-Q6 | 5 | 64 | 34.0 | 21.0 | 16.0 granite |
| 968 | PrM-Q6-T2 | PrM-Q6 | 5 | 65 | 2.5  | 2.0  | 1.0 granite  |
| 969 | PrM-Q6-T2 | PrM-Q6 | 5 | 66 | 18.0 | 11.0 | 8.0 granite  |
| 970 | PrM-Q6-T2 | PrM-Q6 | 5 | 67 | 4.8  | 4.3  | 1.0 granite  |
| 971 | PrM-Q6-T2 | PrM-Q6 | 5 | 68 | 1.8  | 1.8  | 1.5 granite  |
| 972 | PrM-Q6-T2 | PrM-Q6 | 5 | 69 | 12.0 | 9.0  | 8.0 granite  |
| 973 | PrM-Q6-T2 | PrM-Q6 | 5 | 70 | 45.0 | 19.0 | 5.0 granite  |
| 974 | PrM-Q6-T2 | PrM-Q6 | 5 | 71 | 5.1  | 2.6  | 2.4 granite  |
| 975 | PrM-Q6-T2 | PrM-Q6 | 5 | 72 | 6.8  | 4.0  | 1.0 granite  |
| 976 | PrM-Q6-T2 | PrM-Q6 | 5 | 73 | 28.0 | 22.0 | 8.0 granite  |
| 977 | PrM-Q6-T2 | PrM-Q6 | 5 | 74 | 32.0 | 15.0 | 8.0 granite  |
| 978 | PrM-Q6-T2 | PrM-Q6 | 5 | 75 | 25.0 | 13.0 | 9.0 granite  |
| 979 | PrM-Q6-T2 | PrM-Q6 | 5 | 76 | 14.0 | 12.0 | 6.0 granite  |
| 980 | PrM-Q6-T2 | PrM-Q6 | 5 | 77 | 10.0 | 6.5  | 2.5 granite  |
| 981 | PrM-Q6-T2 | PrM-Q6 | 5 | 78 | 2.1  | 1.5  | 1.0 granite  |
| 982 | PrM-Q6-T3 | PrM-Q6 | 5 | 79 | 10.0 | 4.4  | 3.2 granite  |
| 983 | PrM-Q6-T3 | PrM-Q6 | 5 | 80 | 3.7  | 3.0  | 1.6 granite  |
| 984 | PrM-Q6-T3 | PrM-Q6 | 5 | 81 | 22.0 | 20.0 | 14.0 granite |

|      |           |        |    |     |      |      |              |
|------|-----------|--------|----|-----|------|------|--------------|
| 985  | PrM-Q6-T3 | PrM-Q6 | 5  | 82  | 21.0 | 16.0 | 7.0 granite  |
| 986  | PrM-Q6-T3 | PrM-Q6 | 5  | 83  | 2.6  | 1.7  | 0.5 granite  |
| 987  | PrM-Q6-T3 | PrM-Q6 | 5  | 84  | 13.0 | 8.5  | 5.0 granite  |
| 988  | PrM-Q6-T3 | PrM-Q6 | 5  | 85  | 2.2  | 1.4  | 0.5 granite  |
| 989  | PrM-Q6-T3 | PrM-Q6 | 5  | 86  | 2.0  | 1.4  | 1.1 granite  |
| 990  | PrM-Q6-T3 | PrM-Q6 | 5  | 87  | 6.2  | 3.6  | 2.5 granite  |
| 991  | PrM-Q6-T3 | PrM-Q6 | 5  | 88  | 12.0 | 6.5  | 5.3 granite  |
| 992  | PrM-Q6-T3 | PrM-Q6 | 5  | 89  | 3.4  | 2.5  | 1.5 granite  |
| 993  | PrM-Q6-T3 | PrM-Q6 | 5  | 90  | 1.6  | 1.4  | 0.9 granite  |
| 994  | PrM-Q6-T3 | PrM-Q6 | 5  | 91  | 3.7  | 1.7  | 1.3 granite  |
| 995  | PrM-Q6-T3 | PrM-Q6 | 5  | 92  | 17.0 | 12.0 | 5.5 granite  |
| 996  | PrM-Q6-T3 | PrM-Q6 | 5  | 93  | 2.6  | 1.8  | 1.0 granite  |
| 997  | PrM-Q6-T3 | PrM-Q6 | 5  | 94  | 15.0 | 9.0  | 8.0 granite  |
| 998  | PrM-Q6-T3 | PrM-Q6 | 5  | 95  | 3.0  | 2.3  | 0.8 granite  |
| 999  | PrM-Q6-T3 | PrM-Q6 | 5  | 96  | 6.4  | 5.2  | 5.2 granite  |
| 1000 | PrM-Q6-T3 | PrM-Q6 | 5  | 97  | 9.5  | 5.0  | 5.0 granite  |
| 1001 | PrM-Q6-T3 | PrM-Q6 | 5  | 98  | 3.1  | 2.0  | 1.4 granite  |
| 1002 | PrM-Q6-T3 | PrM-Q6 | 5  | 99  | 5.0  | 4.8  | 2.0 granite  |
| 1003 | PrM-Q6-T3 | PrM-Q6 | 5  | 100 | 11.7 | 10.5 | 8.0 granite  |
| 1004 | PrM-Q4-T1 | PrM-Q4 | 30 | 1   | 3.3  | 1.2  | 1.0 granite  |
| 1005 | PrM-Q4-T1 | PrM-Q4 | 30 | 2   | 3.1  | 2.2  | 2.0 granite  |
| 1006 | PrM-Q4-T1 | PrM-Q4 | 30 | 3   | 2.3  | 2.0  | 1.2 granite  |
| 1007 | PrM-Q4-T1 | PrM-Q4 | 30 | 4   | 4.0  | 2.2  | 2.1 granite  |
| 1008 | PrM-Q4-T1 | PrM-Q4 | 30 | 5   | 19.0 | 18.5 | 11.0 granite |
| 1009 | PrM-Q4-T1 | PrM-Q4 | 30 | 6   | 15.0 | 11.0 | 4.0 granite  |
| 1010 | PrM-Q4-T1 | PrM-Q4 | 30 | 7   | 3.5  | 1.6  | 0.6 granite  |
| 1011 | PrM-Q4-T1 | PrM-Q4 | 30 | 8   | 7.2  | 6.5  | 5.5 granite  |
| 1012 | PrM-Q4-T1 | PrM-Q4 | 30 | 9   | 3.2  | 1.4  | 1.1 granite  |
| 1013 | PrM-Q4-T1 | PrM-Q4 | 30 | 10  | 5.0  | 3.7  | 1.3 granite  |
| 1014 | PrM-Q4-T1 | PrM-Q4 | 30 | 11  | 37.0 | 19.0 | 11.0 granite |
| 1015 | PrM-Q4-T1 | PrM-Q4 | 30 | 12  | 23.0 | 13.0 | 12.0 granite |
| 1016 | PrM-Q4-T1 | PrM-Q4 | 30 | 13  | 4.0  | 2.2  | 1.7 granite  |
| 1017 | PrM-Q4-T1 | PrM-Q4 | 30 | 14  | 29.0 | 26.0 | 15.0 granite |
| 1018 | PrM-Q4-T1 | PrM-Q4 | 30 | 15  | 31.0 | 17.0 | 12.0 granite |
| 1019 | PrM-Q4-T1 | PrM-Q4 | 30 | 16  | 16.0 | 10.0 | 12.0 granite |
| 1020 | PrM-Q4-T1 | PrM-Q4 | 30 | 17  | 24.0 | 19.0 | 10.0 granite |
| 1021 | PrM-Q4-T1 | PrM-Q4 | 30 | 18  | 23.0 | 21.0 | 9.0 granite  |
| 1022 | PrM-Q4-T1 | PrM-Q4 | 30 | 19  | 10.5 | 10.0 | 4.5 granite  |
| 1023 | PrM-Q4-T1 | PrM-Q4 | 30 | 20  | 12.5 | 6.0  | 3.0 granite  |
| 1024 | PrM-Q4-T1 | PrM-Q4 | 30 | 21  | 54.0 | 31.0 | 12.0 granite |
| 1025 | PrM-Q4-T1 | PrM-Q4 | 30 | 22  | 1.8  | 1.2  | 0.2 granite  |
| 1026 | PrM-Q4-T1 | PrM-Q4 | 30 | 23  | 39.0 | 22.0 | 15.0 granite |
| 1027 | PrM-Q4-T1 | PrM-Q4 | 30 | 24  | 47.0 | 34.0 | 21.0 granite |
| 1028 | PrM-Q4-T1 | PrM-Q4 | 30 | 25  | 17.0 | 11.0 | 6.0 granite  |
| 1029 | PrM-Q4-T1 | PrM-Q4 | 30 | 26  | 2.0  | 1.2  | 0.5 granite  |
| 1030 | PrM-Q4-T1 | PrM-Q4 | 30 | 27  | 1.7  | 1.5  | 0.9 granite  |
| 1031 | PrM-Q4-T1 | PrM-Q4 | 30 | 28  | 2.5  | 2.4  | 1.2 granite  |

|      |           |        |    |    |      |      |              |
|------|-----------|--------|----|----|------|------|--------------|
| 1032 | PrM-Q4-T1 | PrM-Q4 | 30 | 29 | 13.0 | 10.0 | 5.0 granite  |
| 1033 | PrM-Q4-T1 | PrM-Q4 | 30 | 30 | 2.0  | 1.1  | 0.9 granite  |
| 1034 | PrM-Q4-T1 | PrM-Q4 | 30 | 31 | 42.0 | 26.0 | 10.0 granite |
| 1035 | PrM-Q4-T1 | PrM-Q4 | 30 | 32 | 7.0  | 4.9  | 3.2 granite  |
| 1036 | PrM-Q4-T1 | PrM-Q4 | 30 | 33 | 3.1  | 1.5  | 1.1 granite  |
| 1037 | PrM-Q4-T1 | PrM-Q4 | 30 | 34 | 26.0 | 12.0 | 11.0 granite |
| 1038 | PrM-Q4-T1 | PrM-Q4 | 30 | 35 | 21.0 | 18.0 | 7.0 granite  |
| 1039 | PrM-Q4-T1 | PrM-Q4 | 30 | 36 | 15.0 | 12.0 | 6.0 granite  |
| 1040 | PrM-Q4-T1 | PrM-Q4 | 30 | 37 | 3.6  | 2.6  | 2.0 granite  |
| 1041 | PrM-Q4-T1 | PrM-Q4 | 30 | 38 | 15.8 | 12.5 | 5.0 granite  |
| 1042 | PrM-Q4-T1 | PrM-Q4 | 30 | 39 | 13.0 | 9.0  | 10.0 granite |
| 1043 | PrM-Q4-T1 | PrM-Q4 | 30 | 40 | 8.2  | 6.0  | 4.2 granite  |
| 1044 | PrM-Q4-T1 | PrM-Q4 | 30 | 41 | 12.5 | 6.5  | 4.3 granite  |
| 1045 | PrM-Q4-T2 | PrM-Q4 | 30 | 42 | 7.7  | 3.3  | 2.3 granite  |
| 1046 | PrM-Q4-T2 | PrM-Q4 | 30 | 43 | 2.8  | 1.2  | 1.3 granite  |
| 1047 | PrM-Q4-T2 | PrM-Q4 | 30 | 44 | 4.0  | 3.1  | 2.0 granite  |
| 1048 | PrM-Q4-T2 | PrM-Q4 | 30 | 45 | 2.8  | 2.0  | 1.6 granite  |
| 1049 | PrM-Q4-T2 | PrM-Q4 | 30 | 46 | 4.2  | 3.8  | 3.2 granite  |
| 1050 | PrM-Q4-T2 | PrM-Q4 | 30 | 47 | 6.8  | 2.8  | 2.5 granite  |
| 1051 | PrM-Q4-T2 | PrM-Q4 | 30 | 48 | 12.0 | 6.6  | 5.3 granite  |
| 1052 | PrM-Q4-T2 | PrM-Q4 | 30 | 49 | 10.0 | 6.2  | 3.0 granite  |
| 1053 | PrM-Q4-T2 | PrM-Q4 | 30 | 50 | 6.7  | 2.5  | 2.0 granite  |
| 1054 | PrM-Q4-T2 | PrM-Q4 | 30 | 51 | 7.8  | 5.0  | 2.5 granite  |
| 1055 | PrM-Q4-T2 | PrM-Q4 | 30 | 52 | 16.5 | 11.0 | 10.0 granite |
| 1056 | PrM-Q4-T2 | PrM-Q4 | 30 | 53 | 10.5 | 6.0  | 5.2 granite  |
| 1057 | PrM-Q4-T2 | PrM-Q4 | 30 | 54 | 16.0 | 8.5  | 5.0 granite  |
| 1058 | PrM-Q4-T2 | PrM-Q4 | 30 | 55 | 9.7  | 8.0  | 4.2 granite  |
| 1059 | PrM-Q4-T2 | PrM-Q4 | 30 | 56 | 3.6  | 2.5  | 1.4 granite  |
| 1060 | PrM-Q4-T2 | PrM-Q4 | 30 | 57 | 23.0 | 14.0 | 12.0 granite |
| 1061 | PrM-Q4-T2 | PrM-Q4 | 30 | 58 | 3.0  | 1.6  | 1.4 granite  |
| 1062 | PrM-Q4-T2 | PrM-Q4 | 30 | 59 | 13.5 | 5.0  | 5.0 granite  |
| 1063 | PrM-Q4-T2 | PrM-Q4 | 30 | 60 | 5.5  | 5.0  | 3.6 granite  |
| 1064 | PrM-Q4-T2 | PrM-Q4 | 30 | 61 | 1.5  | 1.0  | 0.7 granite  |
| 1065 | PrM-Q4-T2 | PrM-Q4 | 30 | 62 | 5.0  | 4.5  | 1.5 granite  |
| 1066 | PrM-Q4-T2 | PrM-Q4 | 30 | 63 | 2.2  | 1.3  | 0.7 granite  |
| 1067 | PrM-Q4-T2 | PrM-Q4 | 30 | 64 | 18.0 | 10.0 | 2.0 granite  |
| 1068 | PrM-Q4-T2 | PrM-Q4 | 30 | 65 | 3.7  | 2.0  | 1.3 granite  |
| 1069 | PrM-Q4-T2 | PrM-Q4 | 30 | 66 | 3.8  | 2.9  | 1.5 granite  |
| 1070 | PrM-Q4-T2 | PrM-Q4 | 30 | 67 | 3.6  | 2.1  | 1.3 granite  |
| 1071 | PrM-Q4-T2 | PrM-Q4 | 30 | 68 | 7.5  | 3.1  | 2.8 granite  |
| 1072 | PrM-Q4-T2 | PrM-Q4 | 30 | 69 | 17.0 | 10.0 | 12.0 granite |
| 1073 | PrM-Q4-T3 | PrM-Q4 | 30 | 70 | 2.2  | 1.0  | 0.5 granite  |
| 1074 | PrM-Q4-T3 | PrM-Q4 | 30 | 71 | 24.0 | 12.0 | 11.0 granite |
| 1075 | PrM-Q4-T3 | PrM-Q4 | 30 | 72 | 2.4  | 2.2  | 1.6 granite  |
| 1076 | PrM-Q4-T3 | PrM-Q4 | 30 | 73 | 3.3  | 2.8  | 2.1 granite  |
| 1077 | PrM-Q4-T3 | PrM-Q4 | 30 | 74 | 31.0 | 22.0 | 22.0 granite |
| 1078 | PrM-Q4-T3 | PrM-Q4 | 30 | 75 | 11.0 | 9.0  | 4.3 granite  |

|      |               |        |      |     |       |      |              |
|------|---------------|--------|------|-----|-------|------|--------------|
| 1079 | PrM-Q4-T3     | PrM-Q4 | 30   | 76  | 7.0   | 2.5  | 1.8 granite  |
| 1080 | PrM-Q4-T3     | PrM-Q4 | 30   | 77  | 3.2   | 2.5  | 1.6 granite  |
| 1081 | PrM-Q4-T3     | PrM-Q4 | 30   | 78  | 2.3   | 1.6  | 1.6 granite  |
| 1082 | PrM-Q4-T3     | PrM-Q4 | 30   | 79  | 1.8   | 1.5  | 0.7 granite  |
| 1083 | PrM-Q4-T3     | PrM-Q4 | 30   | 80  | 2.5   | 1.4  | 0.5 granite  |
| 1084 | PrM-Q4-T3     | PrM-Q4 | 30   | 81  | 6.7   | 3.0  | 1.2 granite  |
| 1085 | PrM-Q4-T3     | PrM-Q4 | 30   | 82  | 13.7  | 8.8  | 5.8 granite  |
| 1086 | PrM-Q4-T3     | PrM-Q4 | 30   | 83  | 2.1   | 1.1  | 0.5 granite  |
| 1087 | PrM-Q4-T3     | PrM-Q4 | 30   | 84  | 6.3   | 2.7  | 2.2 granite  |
| 1088 | PrM-Q4-T3     | PrM-Q4 | 30   | 85  | 9.5   | 5.0  | 4.0 granite  |
| 1089 | PrM-Q4-T3     | PrM-Q4 | 30   | 86  | 2.8   | 2.0  | 1.2 granite  |
| 1090 | PrM-Q4-T3     | PrM-Q4 | 30   | 87  | 2.6   | 2.3  | 1.0 granite  |
| 1091 | PrM-Q4-T3     | PrM-Q4 | 30   | 88  | 16.5  | 9.0  | 9.0 granite  |
| 1092 | PrM-Q4-T3     | PrM-Q4 | 30   | 89  | 4.2   | 2.6  | 2.0 granite  |
| 1093 | PrM-Q4-T3     | PrM-Q4 | 30   | 90  | 18.0  | 17.0 | 16.0 granite |
| 1094 | PrM-Q4-T3     | PrM-Q4 | 30   | 91  | 24.0  | 16.5 | 6.0 granite  |
| 1095 | PrM-Q4-T3     | PrM-Q4 | 30   | 92  | 11.5  | 8.5  | 7.0 granite  |
| 1096 | PrM-Q4-T3     | PrM-Q4 | 30   | 93  | 19.0  | 17.0 | 10.0 granite |
| 1097 | PrM-Q4-T3     | PrM-Q4 | 30   | 94  | 2.2   | 2.1  | 0.8 granite  |
| 1098 | PrM-Q4-T3     | PrM-Q4 | 30   | 95  | 1.6   | 2.0  | 0.5 granite  |
| 1099 | PrM-Q4-T3     | PrM-Q4 | 30   | 96  | 6.7   | 4.6  | 2.4 granite  |
| 1100 | PrM-Q4-T3     | PrM-Q4 | 30   | 97  | 3.0   | 2.1  | 0.9 granite  |
| 1101 | PrM-Q4-T3     | PrM-Q4 | 30   | 98  | 8.6   | 6.0  | 3.0 granite  |
| 1102 | PrM-Q4-T3     | PrM-Q4 | 30   | 99  | 2.6   | 1.8  | 1.2 granite  |
| 1103 | PrM-Q4-T3     | PrM-Q4 | 30   | 100 | 2.8   | 1.1  | 0.2 granite  |
| 1104 | LCTiO-20-BT-1 | LCTiO  | 17.7 | 1   | 21.0  | 16.0 | 14.0 granite |
| 1105 | LCTiO-20-BT-1 | LCTiO  | 17.7 | 2   | 7.3   | 6.5  | 4.2 granite  |
| 1106 | LCTiO-20-BT-1 | LCTiO  | 17.7 | 3   | 14.0  | 11.0 | 9.0 granite  |
| 1107 | LCTiO-20-BT-1 | LCTiO  | 17.7 | 4   | 9.5   | 6.0  | 5.0 granite  |
| 1108 | LCTiO-20-BT-1 | LCTiO  | 17.7 | 5   | 51.0  | 46.0 | 25.0 granite |
| 1109 | LCTiO-20-BT-1 | LCTiO  | 17.7 | 6   | 105.0 | 74.0 | 58.0 granite |
| 1110 | LCTiO-20-BT-1 | LCTiO  | 17.7 | 7   | 15.0  | 13.0 | 8.0 granite  |
| 1111 | LCTiO-20-BT-1 | LCTiO  | 17.7 | 8   | 6.8   | 5.3  | 4.1 granite  |
| 1112 | LCTiO-20-BT-1 | LCTiO  | 17.7 | 9   | 83.0  | 60.0 | 47.0 granite |
| 1113 | LCTiO-20-BT-1 | LCTiO  | 17.7 | 10  | 76.0  | 42.0 | 41.0 granite |
| 1114 | LCTiO-20-BT-1 | LCTiO  | 17.7 | 11  | 25.0  | 15.0 | 13.0 granite |
| 1115 | LCTiO-20-BT-1 | LCTiO  | 17.7 | 12  | 13.3  | 5.5  | 4.2 granite  |
| 1116 | LCTiO-20-BT-1 | LCTiO  | 17.7 | 13  | 28.0  | 21.0 | 18.0 granite |
| 1117 | LCTiO-20-BT-1 | LCTiO  | 17.7 | 14  | 14.0  | 14.0 | 10.0 granite |
| 1118 | LCTiO-20-BT-1 | LCTiO  | 17.7 | 15  | 45.0  | 23.0 | 16.0 granite |
| 1119 | LCTiO-20-BT-1 | LCTiO  | 17.7 | 16  | 10.0  | 7.5  | 5.5 granite  |
| 1120 | LCTiO-20-BT-1 | LCTiO  | 17.7 | 17  | 14.2  | 10.5 | 7.0 granite  |
| 1121 | LCTiO-20-BT-1 | LCTiO  | 17.7 | 18  | 35.0  | 25.0 | 18.0 granite |
| 1122 | LCTiO-20-BT-1 | LCTiO  | 17.7 | 19  | 5.0   | 2.1  | 2.0 granite  |
| 1123 | LCTiO-20-BT-1 | LCTiO  | 17.7 | 20  | 7.8   | 5.2  | 3.8 granite  |
| 1124 | LCTiO-20-BT-1 | LCTiO  | 17.7 | 21  | 19.0  | 14.5 | 6.0 granite  |
| 1125 | LCTiO-20-BT-1 | LCTiO  | 17.7 | 22  | 30.0  | 12.0 | 11.0 granite |

|      |               |       |      |    |       |       |              |
|------|---------------|-------|------|----|-------|-------|--------------|
| 1126 | LCTiO-20-BT-1 | LCTiO | 17.7 | 23 | 48.0  | 37.0  | 19.0 granite |
| 1127 | LCTiO-20-BT-1 | LCTiO | 17.7 | 24 | 46.0  | 38.0  | 28.0 granite |
| 1128 | LCTiO-20-BT-1 | LCTiO | 17.7 | 25 | 44.0  | 32.0  | 23.0 granite |
| 1129 | LCTiO-20-BT-1 | LCTiO | 17.7 | 26 | 8.0   | 7.0   | 5.5 granite  |
| 1130 | LCTiO-20-BT-1 | LCTiO | 17.7 | 27 | 14.0  | 9.0   | 9.0 granite  |
| 1131 | LCTiO-20-BT-1 | LCTiO | 17.7 | 28 | 88.0  | 68.0  | 33.0 granite |
| 1132 | LCTiO-20-BT-2 | LCTiO | 17.7 | 29 | 2.5   | 1.9   | 0.9 granite  |
| 1133 | LCTiO-20-BT-2 | LCTiO | 17.7 | 30 | 11.7  | 9.5   | 6.5 granite  |
| 1134 | LCTiO-20-BT-2 | LCTiO | 17.7 | 31 | 42.0  | 23.5  | 16.0 granite |
| 1135 | LCTiO-20-BT-2 | LCTiO | 17.7 | 32 | 27.0  | 17.5  | 14.0 granite |
| 1136 | LCTiO-20-BT-2 | LCTiO | 17.7 | 33 | 17.5  | 11.5  | 8.0 granite  |
| 1137 | LCTiO-20-BT-2 | LCTiO | 17.7 | 34 | 17.5  | 10.3  | 7.0 granite  |
| 1138 | LCTiO-20-BT-2 | LCTiO | 17.7 | 35 | 22.5  | 20.0  | 10.0 granite |
| 1139 | LCTiO-20-BT-2 | LCTiO | 17.7 | 36 | 3.5   | 2.0   | 1.2 granite  |
| 1140 | LCTiO-20-BT-2 | LCTiO | 17.7 | 37 | 17.2  | 13.0  | 7.0 granite  |
| 1141 | LCTiO-20-BT-2 | LCTiO | 17.7 | 38 | 21.0  | 15.0  | 7.0 granite  |
| 1142 | LCTiO-20-BT-2 | LCTiO | 17.7 | 39 | 9.0   | 5.4   | 1.3 granite  |
| 1143 | LCTiO-20-BT-2 | LCTiO | 17.7 | 40 | 12.3  | 12.0  | 6.5 granite  |
| 1144 | LCTiO-20-BT-2 | LCTiO | 17.7 | 41 | 177.0 | 111.0 | 57.0 granite |
| 1145 | LCTiO-20-BT-2 | LCTiO | 17.7 | 42 | 10.0  | 5.7   | 4.7 granite  |
| 1146 | LCTiO-20-BT-2 | LCTiO | 17.7 | 43 | 2.5   | 1.7   | 1.3 granite  |
| 1147 | LCTiO-20-BT-2 | LCTiO | 17.7 | 44 | 3.2   | 2.6   | 2.0 granite  |
| 1148 | LCTiO-20-BT-2 | LCTiO | 17.7 | 45 | 3.7   | 3.2   | 0.5 granite  |
| 1149 | LCTiO-20-BT-2 | LCTiO | 17.7 | 46 | 1.4   | 1.2   | 0.6 granite  |
| 1150 | LCTiO-20-BT-2 | LCTiO | 17.7 | 47 | 136.0 | 142.0 | 70.0 granite |
| 1151 | LCTiO-20-BT-2 | LCTiO | 17.7 | 48 | 1.4   | 1.2   | 0.7 granite  |
| 1152 | LCTiO-20-BT-2 | LCTiO | 17.7 | 49 | 109.0 | 108.0 | 66.0 granite |
| 1153 | LCTiO-20-BT-2 | LCTiO | 17.7 | 50 | 1.5   | 1.2   | 1.1 granite  |
| 1154 | LCTiO-20-BT-2 | LCTiO | 17.7 | 51 | 1.7   | 1.4   | 0.6 granite  |
| 1155 | LCTiO-20-BT-2 | LCTiO | 17.7 | 52 | 3.3   | 2.6   | 1.7 granite  |
| 1156 | LCTiO-20-BT-2 | LCTiO | 17.7 | 53 | 1.8   | 1.4   | 1.0 granite  |
| 1157 | LCTiO-20-BT-2 | LCTiO | 17.7 | 54 | 45.0  | 41.0  | 13.0 granite |
| 1158 | LCTiO-20-BT-2 | LCTiO | 17.7 | 55 | 1.7   | 1.3   | 1.2 granite  |
| 1159 | LCTiO-20-BT-3 | LCTiO | 17.7 | 56 | 2.2   | 1.6   | 1.3 granite  |
| 1160 | LCTiO-20-BT-3 | LCTiO | 17.7 | 57 | 12.5  | 9.0   | 7.5 granite  |
| 1161 | LCTiO-20-BT-3 | LCTiO | 17.7 | 58 | 4.5   | 1.5   | 0.9 granite  |
| 1162 | LCTiO-20-BT-3 | LCTiO | 17.7 | 59 | 7.6   | 6.0   | 4.2 granite  |
| 1163 | LCTiO-20-BT-3 | LCTiO | 17.7 | 60 | 31.0  | 26.0  | 17.0 granite |
| 1164 | LCTiO-20-BT-3 | LCTiO | 17.7 | 61 | 8.3   | 7.0   | 5.3 granite  |
| 1165 | LCTiO-20-BT-3 | LCTiO | 17.7 | 62 | 3.7   | 2.8   | 2.0 granite  |
| 1166 | LCTiO-20-BT-3 | LCTiO | 17.7 | 63 | 2.4   | 1.1   | 1.0 granite  |
| 1167 | LCTiO-20-BT-3 | LCTiO | 17.7 | 64 | 1.0   | 1.0   | 0.5 granite  |
| 1168 | LCTiO-20-BT-3 | LCTiO | 17.7 | 65 | 1.3   | 1.2   | 0.9 granite  |
| 1169 | LCTiO-20-BT-3 | LCTiO | 17.7 | 66 | 21.0  | 17.0  | 8.0 granite  |
| 1170 | LCTiO-20-BT-3 | LCTiO | 17.7 | 67 | 18.0  | 12.5  | 9.5 granite  |
| 1171 | LCTiO-20-BT-3 | LCTiO | 17.7 | 68 | 3.4   | 2.9   | 2.5 granite  |
| 1172 | LCTiO-20-BT-3 | LCTiO | 17.7 | 69 | 25.0  | 21.0  | 16.0 granite |

|      |               |       |       |     |       |       |              |
|------|---------------|-------|-------|-----|-------|-------|--------------|
| 1173 | LCTiO-20-BT-3 | LCTiO | 17.7  | 70  | 25.0  | 21.0  | 12.0 granite |
| 1174 | LCTiO-20-BT-3 | LCTiO | 17.7  | 71  | 9.8   | 5.8   | 2.0 granite  |
| 1175 | LCTiO-20-BT-3 | LCTiO | 17.7  | 72  | 20.0  | 15.0  | 11.0 granite |
| 1176 | LCTiO-20-BT-3 | LCTiO | 17.7  | 73  | 11.5  | 9.0   | 4.0 granite  |
| 1177 | LCTiO-20-BT-3 | LCTiO | 17.7  | 74  | 14.0  | 14.0  | 11.0 granite |
| 1178 | LCTiO-20-BT-3 | LCTiO | 17.7  | 75  | 6.2   | 5.6   | 3.0 granite  |
| 1179 | LCTiO-20-BT-3 | LCTiO | 17.7  | 76  | 55.0  | 32.0  | 11.0 granite |
| 1180 | LCTiO-20-BT-3 | LCTiO | 17.7  | 77  | 31.0  | 19.0  | 12.0 granite |
| 1181 | LCTiO-20-BT-3 | LCTiO | 17.7  | 78  | 9.0   | 7.2   | 5.2 granite  |
| 1182 | LCTiO-20-BT-3 | LCTiO | 17.7  | 79  | 27.0  | 17.0  | 15.0 granite |
| 1183 | LCTiO-20-BT-3 | LCTiO | 17.7  | 80  | 24.0  | 21.0  | 12.0 granite |
| 1184 | LCTiO-20-BT-3 | LCTiO | 17.7  | 81  | 12.0  | 8.0   | 4.0 granite  |
| 1185 | LCTiO-20-BT-3 | LCTiO | 17.7  | 82  | 29.0  | 23.0  | 11.0 granite |
| 1186 | LCTiO-20-BT-3 | LCTiO | 17.7  | 83  | 5.8   | 4.8   | 3.5 granite  |
| 1187 | LCTiO-20-BT-3 | LCTiO | 17.7  | 84  | 16.0  | 7.0   | 6.0 granite  |
| 1188 | LCTiO-20-BT-3 | LCTiO | 17.7  | 85  | 60.0  | 26.0  | 20.0 granite |
| 1189 | LCTiO-20-BT-3 | LCTiO | 17.7  | 86  | 42.0  | 29.0  | 36.0 granite |
| 1190 | LCTiO-20-BT-3 | LCTiO | 17.7  | 87  | 8.0   | 5.8   | 5.3 granite  |
| 1191 | LCTiO-20-BT-3 | LCTiO | 17.7  | 88  | 25.0  | 25.0  | 13.0 granite |
| 1192 | LCTiO-20-BT-3 | LCTiO | 17.7  | 89  | 33.0  | 31.0  | 16.0 granite |
| 1193 | LCTiO-20-BT-3 | LCTiO | 17.7  | 90  | 9.0   | 7.3   | 4.4 granite  |
| 1194 | LCTiO-20-BT-3 | LCTiO | 17.7  | 91  | 8.0   | 6.2   | 3.5 granite  |
| 1195 | LCTiO-20-BT-3 | LCTiO | 17.7  | 92  | 20.0  | 16.0  | 12.0 granite |
| 1196 | LCTiO-20-BT-3 | LCTiO | 17.7  | 93  | 2.0   | 1.5   | 1.2 granite  |
| 1197 | LCTiO-20-BT-3 | LCTiO | 17.7  | 94  | 2.3   | 2.2   | 1.1 granite  |
| 1198 | LCTiO-20-BT-3 | LCTiO | 17.7  | 95  | 17.0  | 11.5  | 8.0 granite  |
| 1199 | LCTiO-20-BT-3 | LCTiO | 17.7  | 96  | 6.1   | 5.6   | 3.7 granite  |
| 1200 | LCTiO-20-BT-3 | LCTiO | 17.7  | 97  | 6.0   | 4.8   | 4.5 granite  |
| 1201 | LCTiO-20-BT-3 | LCTiO | 17.7  | 98  | 17.0  | 16.0  | 10.0 granite |
| 1202 | LCTiO-20-BT-3 | LCTiO | 17.7  | 99  | 3.7   | 2.7   | 2.0 granite  |
| 1203 | LCTiO-20-BT-3 | LCTiO | 17.7  | 100 | 15.5  | 8.0   | 5.5 granite  |
| 1204 | LCSH-20-T1    | LCSH  | 101.1 | 1   | 1.2   | 1.0   | 0.6 granite  |
| 1205 | LCSH-20-T1    | LCSH  | 101.1 | 2   | 3.0   | 2.7   | 1.3 granite  |
| 1206 | LCSH-20-T1    | LCSH  | 101.1 | 3   | 1.4   | 1.2   | 0.7 granite  |
| 1207 | LCSH-20-T1    | LCSH  | 101.1 | 4   | 4.3   | 3.3   | 1.4 granite  |
| 1208 | LCSH-20-T1    | LCSH  | 101.1 | 5   | 1.4   | 1.0   | 0.7 granite  |
| 1209 | LCSH-20-T1    | LCSH  | 101.1 | 6   | 1.4   | 1.0   | 0.5 granite  |
| 1210 | LCSH-20-T1    | LCSH  | 101.1 | 7   | 1.3   | 1.0   | 0.6 granite  |
| 1211 | LCSH-20-T1    | LCSH  | 101.1 | 8   | 1.2   | 1.1   | 0.6 granite  |
| 1212 | LCSH-20-T1    | LCSH  | 101.1 | 9   | 1.5   | 1.1   | 0.8 granite  |
| 1213 | LCSH-20-T1    | LCSH  | 101.1 | 10  | 2.2   | 1.3   | 1.1 granite  |
| 1214 | LCSH-20-T1    | LCSH  | 101.1 | 11  | 1.3   | 1.1   | 0.5 granite  |
| 1215 | LCSH-20-T1    | LCSH  | 101.1 | 12  | 1.2   | 1.2   | 1.0 granite  |
| 1216 | LCSH-20-T1    | LCSH  | 101.1 | 13  | 1.4   | 1.4   | 0.6 granite  |
| 1217 | LCSH-20-T1    | LCSH  | 101.1 | 14  | 4.6   | 4.0   | 2.0 granite  |
| 1218 | LCSH-20-T1    | LCSH  | 101.1 | 15  | 170.0 | 159.0 | 62.0 granite |
| 1219 | LCSH-20-T1    | LCSH  | 101.1 | 16  | 1.2   | 1.0   | 0.4 granite  |

|      |            |      |       |    |      |      |              |
|------|------------|------|-------|----|------|------|--------------|
| 1220 | LCSH-20-T1 | LCSH | 101.1 | 17 | 1.8  | 1.4  | 0.4 granite  |
| 1221 | LCSH-20-T1 | LCSH | 101.1 | 18 | 1.4  | 1.0  | 0.7 granite  |
| 1222 | LCSH-20-T1 | LCSH | 101.1 | 19 | 1.3  | 1.1  | 0.6 granite  |
| 1223 | LCSH-20-T1 | LCSH | 101.1 | 20 | 3.2  | 3.1  | 2.1 granite  |
| 1224 | LCSH-20-T1 | LCSH | 101.1 | 21 | 2.1  | 1.3  | 1.1 granite  |
| 1225 | LCSH-20-T1 | LCSH | 101.1 | 22 | 1.2  | 1.0  | 0.8 granite  |
| 1226 | LCSH-20-T1 | LCSH | 101.1 | 23 | 1.5  | 1.4  | 0.5 granite  |
| 1227 | LCSH-20-T1 | LCSH | 101.1 | 24 | 1.8  | 1.3  | 0.8 granite  |
| 1228 | LCSH-20-T1 | LCSH | 101.1 | 25 | 1.6  | 1.2  | 0.6 granite  |
| 1229 | LCSH-20-T1 | LCSH | 101.1 | 26 | 1.9  | 1.7  | 1.0 granite  |
| 1230 | LCSH-20-T1 | LCSH | 101.1 | 27 | 29.5 | 10.5 | 5.0 granite  |
| 1231 | LCSH-20-T1 | LCSH | 101.1 | 28 | 26.0 | 15.0 | 7.0 granite  |
| 1232 | LCSH-20-T1 | LCSH | 101.1 | 29 | 2.8  | 2.0  | 1.0 granite  |
| 1233 | LCSH-20-T1 | LCSH | 101.1 | 30 | 1.2  | 1.1  | 0.5 granite  |
| 1234 | LCSH-20-T1 | LCSH | 101.1 | 31 | 1.3  | 1.0  | 0.2 granite  |
| 1235 | LCSH-20-T1 | LCSH | 101.1 | 32 | 22.0 | 8.5  | 2.0 granite  |
| 1236 | LCSH-20-T1 | LCSH | 101.1 | 33 | 62.0 | 43.0 | 19.0 granite |
| 1237 | LCSH-20-T1 | LCSH | 101.1 | 34 | 3.8  | 2.0  | 1.1 granite  |
| 1238 | LCSH-20-T1 | LCSH | 101.1 | 35 | 2.3  | 1.8  | 1.2 granite  |
| 1239 | LCSH-20-T1 | LCSH | 101.1 | 36 | 10.5 | 8.0  | 6.0 granite  |
| 1240 | LCSH-20-T1 | LCSH | 101.1 | 37 | 1.5  | 1.1  | 0.9 granite  |
| 1241 | LCSH-20-T1 | LCSH | 101.1 | 38 | 2.0  | 1.0  | 1.0 granite  |
| 1242 | LCSH-20-T1 | LCSH | 101.1 | 39 | 2.9  | 2.0  | 1.3 granite  |
| 1243 | LCSH-20-T1 | LCSH | 101.1 | 40 | 5.2  | 3.6  | 3.3 granite  |
| 1244 | LCSH-20-T1 | LCSH | 101.1 | 41 | 1.5  | 1.2  | 1.1 granite  |
| 1245 | LCSH-20-T1 | LCSH | 101.1 | 42 | 1.0  | 1.0  | 0.8 granite  |
| 1246 | LCSH-20-T1 | LCSH | 101.1 | 43 | 1.9  | 1.4  | 1.0 granite  |
| 1247 | LCSH-20-T1 | LCSH | 101.1 | 44 | 1.3  | 1.2  | 1.0 granite  |
| 1248 | LCSH-20-T1 | LCSH | 101.1 | 45 | 1.4  | 1.0  | 0.6 granite  |
| 1249 | LCSH-20-T1 | LCSH | 101.1 | 46 | 30.0 | 17.0 | 9.0 granite  |
| 1250 | LCSH-20-T1 | LCSH | 101.1 | 47 | 1.3  | 1.0  | 0.7 granite  |
| 1251 | LCSH-20-T1 | LCSH | 101.1 | 48 | 1.5  | 1.2  | 0.6 granite  |
| 1252 | LCSH-20-T1 | LCSH | 101.1 | 49 | 33.0 | 19.0 | 8.0 granite  |
| 1253 | LCSH-20-T1 | LCSH | 101.1 | 50 | 2.0  | 1.9  | 0.8 granite  |
| 1254 | LCSH-20-T1 | LCSH | 101.1 | 51 | 2.0  | 1.7  | 1.6 granite  |
| 1255 | LCSH-20-T1 | LCSH | 101.1 | 52 | 1.2  | 1.0  | 0.5 granite  |
| 1256 | LCSH-20-T1 | LCSH | 101.1 | 53 | 1.7  | 1.0  | 0.4 granite  |
| 1257 | LCSH-20-T1 | LCSH | 101.1 | 54 | 1.7  | 1.3  | 1.0 granite  |
| 1258 | LCSH-20-T1 | LCSH | 101.1 | 55 | 4.4  | 3.0  | 2.4 granite  |
| 1259 | LCSH-20-T1 | LCSH | 101.1 | 56 | 1.2  | 1.0  | 0.5 granite  |
| 1260 | LCSH-20-T1 | LCSH | 101.1 | 57 | 1.2  | 1.0  | 0.5 granite  |
| 1261 | LCSH-20-T1 | LCSH | 101.1 | 58 | 2.1  | 1.8  | 1.3 granite  |
| 1262 | LCSH-20-T1 | LCSH | 101.1 | 59 | 2.0  | 1.4  | 1.0 granite  |
| 1263 | LCSH-20-T3 | LCSH | 101.1 | 60 | 15.0 | 1.0  | 0.9 granite  |
| 1264 | LCSH-20-T3 | LCSH | 101.1 | 61 | 1.7  | 1.0  | 0.8 granite  |
| 1265 | LCSH-20-T3 | LCSH | 101.1 | 62 | 1.2  | 1.2  | 1.1 granite  |
| 1266 | LCSH-20-T3 | LCSH | 101.1 | 63 | 2.2  | 1.2  | 1.1 granite  |

|      |            |      |       |     |       |      |      |         |
|------|------------|------|-------|-----|-------|------|------|---------|
| 1267 | LCSH-20-T3 | LCSH | 101.1 | 64  | 1.5   | 1.4  | 1.3  | granite |
| 1268 | LCSH-20-T3 | LCSH | 101.1 | 65  | 1.1   | 1.0  | 0.6  | granite |
| 1269 | LCSH-20-T3 | LCSH | 101.1 | 66  | 1.3   | 1.1  | 0.8  | granite |
| 1270 | LCSH-20-T3 | LCSH | 101.1 | 67  | 6.8   | 3.6  | 1.5  | granite |
| 1271 | LCSH-20-T3 | LCSH | 101.1 | 68  | 1.2   | 1.0  | 0.7  | granite |
| 1272 | LCSH-20-T3 | LCSH | 101.1 | 69  | 1.5   | 1.1  | 0.8  | granite |
| 1273 | LCSH-20-T3 | LCSH | 101.1 | 70  | 1.8   | 1.0  | 0.6  | granite |
| 1274 | LCSH-20-T3 | LCSH | 101.1 | 71  | 1.5   | 1.1  | 0.9  | granite |
| 1275 | LCSH-20-T3 | LCSH | 101.1 | 72  | 1.8   | 1.3  | 0.8  | granite |
| 1276 | LCSH-20-T3 | LCSH | 101.1 | 73  | 1.3   | 1.0  | 0.6  | granite |
| 1277 | LCSH-20-T3 | LCSH | 101.1 | 74  | 2.2   | 1.3  | 1.0  | granite |
| 1278 | LCSH-20-T3 | LCSH | 101.1 | 75  | 1.4   | 1.1  | 0.8  | granite |
| 1279 | LCSH-20-T3 | LCSH | 101.1 | 76  | 1.4   | 1.0  | 0.9  | granite |
| 1280 | LCSH-20-T3 | LCSH | 101.1 | 77  | 2.8   | 1.9  | 1.6  | granite |
| 1281 | LCSH-20-T3 | LCSH | 101.1 | 78  | 3.2   | 2.4  | 1.8  | granite |
| 1282 | LCSH-20-T3 | LCSH | 101.1 | 79  | 1.1   | 1.0  | 0.5  | granite |
| 1283 | LCSH-20-T3 | LCSH | 101.1 | 80  | 3.7   | 3.6  | 1.7  | granite |
| 1284 | LCSH-20-T3 | LCSH | 101.1 | 81  | 1.7   | 1.0  | 0.7  | granite |
| 1285 | LCSH-20-T3 | LCSH | 101.1 | 82  | 2.8   | 1.6  | 1.2  | granite |
| 1286 | LCSH-20-T3 | LCSH | 101.1 | 83  | 1.9   | 1.3  | 0.8  | granite |
| 1287 | LCSH-20-T3 | LCSH | 101.1 | 84  | 1.3   | 1.0  | 0.9  | granite |
| 1288 | LCSH-20-T3 | LCSH | 101.1 | 85  | 134.0 | 69.0 | 30.0 | granite |
| 1289 | LCSH-20-T3 | LCSH | 101.1 | 86  | 1.3   | 1.2  | 0.7  | granite |
| 1290 | LCSH-20-T3 | LCSH | 101.1 | 87  | 1.8   | 1.2  | 0.6  | granite |
| 1291 | LCSH-20-T3 | LCSH | 101.1 | 88  | 3.5   | 1.8  | 1.5  | granite |
| 1292 | LCSH-20-T3 | LCSH | 101.1 | 89  | 1.6   | 1.0  | 0.7  | granite |
| 1293 | LCSH-20-T3 | LCSH | 101.1 | 90  | 2.9   | 2.9  | 1.6  | granite |
| 1294 | LCSH-20-T3 | LCSH | 101.1 | 91  | 3.9   | 2.0  | 2.0  | granite |
| 1295 | LCSH-20-T3 | LCSH | 101.1 | 92  | 1.7   | 1.2  | 1.2  | granite |
| 1296 | LCSH-20-T3 | LCSH | 101.1 | 93  | 1.7   | 1.3  | 0.8  | granite |
| 1297 | LCSH-20-T3 | LCSH | 101.1 | 94  | 1.4   | 1.2  | 0.7  | granite |
| 1298 | LCSH-20-T3 | LCSH | 101.1 | 95  | 1.8   | 1.1  | 0.4  | granite |
| 1299 | LCSH-20-T3 | LCSH | 101.1 | 96  | 3.7   | 2.5  | 1.9  | granite |
| 1300 | LCSH-20-T3 | LCSH | 101.1 | 97  | 1.9   | 1.4  | 1.2  | granite |
| 1301 | LCSH-20-T3 | LCSH | 101.1 | 98  | 1.4   | 1.1  | 0.4  | granite |
| 1302 | LCSH-20-T3 | LCSH | 101.1 | 99  | 2.7   | 1.6  | 1.4  | granite |
| 1303 | LCSH-20-T3 | LCSH | 101.1 | 100 | 3.2   | 2.2  | 1.2  | granite |
| 1304 | LCMB-20-T1 | LCMB | 45.8  | 1   | 1.6   | 1.2  | 0.5  | granite |
| 1305 | LCMB-20-T1 | LCMB | 45.8  | 2   | 1.5   | 1.4  | 0.8  | granite |
| 1306 | LCMB-20-T1 | LCMB | 45.8  | 3   | 1.3   | 1.0  | 0.5  | granite |
| 1307 | LCMB-20-T1 | LCMB | 45.8  | 4   | 4.2   | 2.8  | 1.5  | granite |
| 1308 | LCMB-20-T1 | LCMB | 45.8  | 5   | 1.7   | 1.3  | 0.8  | granite |
| 1309 | LCMB-20-T1 | LCMB | 45.8  | 6   | 2.3   | 1.3  | 0.6  | granite |
| 1310 | LCMB-20-T1 | LCMB | 45.8  | 7   | 2.7   | 1.6  | 0.8  | granite |
| 1311 | LCMB-20-T1 | LCMB | 45.8  | 8   | 4.4   | 2.1  | 1.1  | granite |
| 1312 | LCMB-20-T1 | LCMB | 45.8  | 9   | 2.8   | 1.1  | 0.6  | granite |
| 1313 | LCMB-20-T1 | LCMB | 45.8  | 10  | 2.0   | 1.6  | 1.3  | granite |

|      |            |      |      |    |      |      |              |
|------|------------|------|------|----|------|------|--------------|
| 1314 | LCMB-20-T1 | LCMB | 45.8 | 11 | 3.9  | 2.4  | 1.2 granite  |
| 1315 | LCMB-20-T1 | LCMB | 45.8 | 12 | 5.6  | 3.0  | 1.0 granite  |
| 1316 | LCMB-20-T1 | LCMB | 45.8 | 13 | 1.2  | 1.0  | 0.4 granite  |
| 1317 | LCMB-20-T1 | LCMB | 45.8 | 14 | 1.2  | 1.0  | 0.3 granite  |
| 1318 | LCMB-20-T1 | LCMB | 45.8 | 15 | 1.3  | 1.1  | 0.6 granite  |
| 1319 | LCMB-20-T1 | LCMB | 45.8 | 16 | 2.0  | 1.6  | 0.6 granite  |
| 1320 | LCMB-20-T1 | LCMB | 45.8 | 17 | 4.5  | 3.2  | 1.2 granite  |
| 1321 | LCMB-20-T1 | LCMB | 45.8 | 18 | 2.4  | 1.2  | 0.8 granite  |
| 1322 | LCMB-20-T1 | LCMB | 45.8 | 19 | 2.7  | 2.3  | 1.1 granite  |
| 1323 | LCMB-20-T1 | LCMB | 45.8 | 20 | 45.0 | 38.0 | 27.0 granite |
| 1324 | LCMB-20-T1 | LCMB | 45.8 | 21 | 1.8  | 1.6  | 0.5 granite  |
| 1325 | LCMB-20-T1 | LCMB | 45.8 | 22 | 1.5  | 1.1  | 0.7 granite  |
| 1326 | LCMB-20-T1 | LCMB | 45.8 | 23 | 1.1  | 1.0  | 0.5 granite  |
| 1327 | LCMB-20-T1 | LCMB | 45.8 | 24 | 15.7 | 5.5  | 2.0 granite  |
| 1328 | LCMB-20-T1 | LCMB | 45.8 | 25 | 2.7  | 1.6  | 0.8 granite  |
| 1329 | LCMB-20-T1 | LCMB | 45.8 | 26 | 4.5  | 3.0  | 1.8 granite  |
| 1330 | LCMB-20-T1 | LCMB | 45.8 | 27 | 3.2  | 2.2  | 1.7 granite  |
| 1331 | LCMB-20-T1 | LCMB | 45.8 | 28 | 1.3  | 1.0  | 0.5 granite  |
| 1332 | LCMB-20-T1 | LCMB | 45.8 | 29 | 2.8  | 1.7  | 1.6 granite  |
| 1333 | LCMB-20-T1 | LCMB | 45.8 | 30 | 1.3  | 1.2  | 0.8 granite  |
| 1334 | LCMB-20-T1 | LCMB | 45.8 | 31 | 1.7  | 1.7  | 0.7 granite  |
| 1335 | LCMB-20-T1 | LCMB | 45.8 | 32 | 1.4  | 1.0  | 0.3 granite  |
| 1336 | LCMB-20-T1 | LCMB | 45.8 | 33 | 1.3  | 1.3  | 0.2 granite  |
| 1337 | LCMB-20-T1 | LCMB | 45.8 | 34 | 1.2  | 1.0  | 0.5 granite  |
| 1338 | LCMB-20-T1 | LCMB | 45.8 | 35 | 1.5  | 1.4  | 1.0 granite  |
| 1339 | LCMB-20-T2 | LCMB | 45.8 | 36 | 2.5  | 1.3  | 0.8 granite  |
| 1340 | LCMB-20-T2 | LCMB | 45.8 | 37 | 1.4  | 1.1  | 0.5 granite  |
| 1341 | LCMB-20-T2 | LCMB | 45.8 | 38 | 1.7  | 1.6  | 0.5 granite  |
| 1342 | LCMB-20-T2 | LCMB | 45.8 | 39 | 1.4  | 1.0  | 0.6 granite  |
| 1343 | LCMB-20-T2 | LCMB | 45.8 | 40 | 5.6  | 4.7  | 0.9 granite  |
| 1344 | LCMB-20-T2 | LCMB | 45.8 | 41 | 1.5  | 1.1  | 0.9 granite  |
| 1345 | LCMB-20-T2 | LCMB | 45.8 | 42 | 1.1  | 1.0  | 0.6 granite  |
| 1346 | LCMB-20-T2 | LCMB | 45.8 | 43 | 25.0 | 10.0 | 2.0 granite  |
| 1347 | LCMB-20-T2 | LCMB | 45.8 | 44 | 27.0 | 18.0 | 13.0 granite |
| 1348 | LCMB-20-T2 | LCMB | 45.8 | 45 | 1.1  | 1.0  | 0.6 granite  |
| 1349 | LCMB-20-T2 | LCMB | 45.8 | 46 | 1.5  | 1.2  | 0.4 granite  |
| 1350 | LCMB-20-T2 | LCMB | 45.8 | 47 | 1.5  | 1.0  | 0.4 granite  |
| 1351 | LCMB-20-T2 | LCMB | 45.8 | 48 | 6.1  | 5.7  | 2.6 granite  |
| 1352 | LCMB-20-T2 | LCMB | 45.8 | 49 | 2.0  | 1.4  | 0.6 granite  |
| 1353 | LCMB-20-T2 | LCMB | 45.8 | 50 | 1.4  | 1.0  | 0.9 granite  |
| 1354 | LCMB-20-T2 | LCMB | 45.8 | 51 | 1.8  | 1.7  | 1.1 granite  |
| 1355 | LCMB-20-T2 | LCMB | 45.8 | 52 | 2.0  | 1.8  | 0.8 granite  |
| 1356 | LCMB-20-T2 | LCMB | 45.8 | 53 | 2.3  | 1.8  | 1.3 granite  |
| 1357 | LCMB-20-T2 | LCMB | 45.8 | 54 | 4.0  | 2.5  | 0.6 granite  |
| 1358 | LCMB-20-T2 | LCMB | 45.8 | 55 | 1.6  | 1.0  | 0.7 granite  |
| 1359 | LCMB-20-T2 | LCMB | 45.8 | 56 | 4.0  | 2.5  | 0.6 granite  |
| 1360 | LCMB-20-T2 | LCMB | 45.8 | 57 | 1.7  | 1.0  | 1.0 granite  |

|      |            |      |      |     |      |      |              |
|------|------------|------|------|-----|------|------|--------------|
| 1361 | LCMB-20-T2 | LCMB | 45.8 | 58  | 3.0  | 2.5  | 1.2 granite  |
| 1362 | LCMB-20-T2 | LCMB | 45.8 | 59  | 1.3  | 1.2  | 0.8 granite  |
| 1363 | LCMB-20-T2 | LCMB | 45.8 | 60  | 1.1  | 1.0  | 0.6 granite  |
| 1364 | LCMB-20-T2 | LCMB | 45.8 | 61  | 5.7  | 3.2  | 1.2 granite  |
| 1365 | LCMB-20-T2 | LCMB | 45.8 | 62  | 2.1  | 1.4  | 0.6 granite  |
| 1366 | LCMB-20-T2 | LCMB | 45.8 | 63  | 2.7  | 1.4  | 0.6 granite  |
| 1367 | LCMB-20-T2 | LCMB | 45.8 | 64  | 2.1  | 2.0  | 1.0 granite  |
| 1368 | LCMB-20-T2 | LCMB | 45.8 | 65  | 2.5  | 2.0  | 1.5 granite  |
| 1369 | LCMB-20-T2 | LCMB | 45.8 | 66  | 1.3  | 1.0  | 0.4 granite  |
| 1370 | LCMB-20-T2 | LCMB | 45.8 | 67  | 24.0 | 23.0 | 10.0 granite |
| 1371 | LCMB-20-T2 | LCMB | 45.8 | 68  | 1.4  | 1.0  | 0.9 granite  |
| 1372 | LCMB-20-T2 | LCMB | 45.8 | 69  | 1.7  | 1.2  | 0.6 granite  |
| 1373 | LCMB-20-T2 | LCMB | 45.8 | 70  | 21.0 | 7.0  | 7.0 granite  |
| 1374 | LCMB-20-T2 | LCMB | 45.8 | 71  | 1.9  | 1.3  | 0.8 granite  |
| 1375 | LCMB-20-T2 | LCMB | 45.8 | 72  | 2.2  | 2.2  | 1.0 granite  |
| 1376 | LCMB-20-T2 | LCMB | 45.8 | 73  | 2.7  | 1.8  | 1.0 granite  |
| 1377 | LCMB-20-T2 | LCMB | 45.8 | 74  | 2.2  | 1.1  | 0.5 granite  |
| 1378 | LCMB-20-T2 | LCMB | 45.8 | 75  | 2.7  | 2.1  | 1.6 granite  |
| 1379 | LCMB-20-T2 | LCMB | 45.8 | 76  | 5.3  | 4.2  | 3.3 granite  |
| 1380 | LCMB-20-T2 | LCMB | 45.8 | 77  | 3.1  | 1.8  | 0.8 granite  |
| 1381 | LCMB-20-T2 | LCMB | 45.8 | 78  | 15.5 | 9.5  | 7.0 granite  |
| 1382 | LCMB-20-T2 | LCMB | 45.8 | 79  | 1.9  | 1.3  | 1.1 granite  |
| 1383 | LCMB-20-T2 | LCMB | 45.8 | 80  | 1.9  | 1.2  | 0.2 granite  |
| 1384 | LCMB-20-T2 | LCMB | 45.8 | 81  | 1.4  | 1.0  | 0.8 granite  |
| 1385 | LCMB-20-T2 | LCMB | 45.8 | 82  | 1.3  | 1.1  | 0.6 granite  |
| 1386 | LCMB-20-T2 | LCMB | 45.8 | 83  | 1.4  | 1.2  | 1.0 granite  |
| 1387 | LCMB-20-T2 | LCMB | 45.8 | 84  | 2.0  | 1.7  | 0.5 granite  |
| 1388 | LCMB-20-T2 | LCMB | 45.8 | 85  | 2.7  | 1.4  | 0.7 granite  |
| 1389 | LCMB-20-T2 | LCMB | 45.8 | 86  | 3.4  | 2.6  | 1.7 granite  |
| 1390 | LCMB-20-T2 | LCMB | 45.8 | 87  | 2.2  | 1.5  | 0.5 granite  |
| 1391 | LCMB-20-T2 | LCMB | 45.8 | 88  | 2.5  | 1.0  | 0.6 granite  |
| 1392 | LCMB-20-T2 | LCMB | 45.8 | 89  | 2.8  | 1.6  | 0.4 granite  |
| 1393 | LCMB-20-T2 | LCMB | 45.8 | 90  | 1.4  | 1.1  | 0.4 granite  |
| 1394 | LCMB-20-T2 | LCMB | 45.8 | 91  | 3.6  | 1.6  | 1.5 granite  |
| 1395 | LCMB-20-T2 | LCMB | 45.8 | 92  | 1.4  | 1.0  | 1.0 granite  |
| 1396 | LCMB-20-T2 | LCMB | 45.8 | 93  | 5.9  | 3.3  | 3.3 granite  |
| 1397 | LCMB-20-T2 | LCMB | 45.8 | 94  | 3.4  | 2.3  | 1.3 granite  |
| 1398 | LCMB-20-T2 | LCMB | 45.8 | 95  | 1.4  | 1.0  | 0.8 granite  |
| 1399 | LCMB-20-T2 | LCMB | 45.8 | 96  | 1.9  | 1.0  | 0.3 granite  |
| 1400 | LCMB-20-T2 | LCMB | 45.8 | 97  | 4.7  | 4.6  | 1.7 granite  |
| 1401 | LCMB-20-T2 | LCMB | 45.8 | 98  | 2.7  | 1.5  | 0.6 granite  |
| 1402 | LCMB-20-T2 | LCMB | 45.8 | 99  | 1.3  | 1.3  | 0.4 granite  |
| 1403 | LCMB-20-T2 | LCMB | 45.8 | 100 | 2.4  | 1.4  | 0.5 granite  |
| 1404 | LCTi-20-T1 | LCTi | 17.9 | 1   | 13.6 | 8.2  | 5.5 granite  |
| 1405 | LCTi-20-T1 | LCTi | 17.9 | 2   | 9.8  | 8.5  | 7.5 granite  |
| 1406 | LCTi-20-T1 | LCTi | 17.9 | 3   | 2.2  | 2.2  | 1.0 granite  |
| 1407 | LCTi-20-T1 | LCTi | 17.9 | 4   | 28.0 | 24.0 | 13.0 granite |

|      |            |      |      |    |      |      |              |
|------|------------|------|------|----|------|------|--------------|
| 1408 | LCTi-20-T1 | LCTi | 17.9 | 5  | 22.0 | 17.0 | 12.0 granite |
| 1409 | LCTi-20-T1 | LCTi | 17.9 | 6  | 27.0 | 17.0 | 11.5 granite |
| 1410 | LCTi-20-T1 | LCTi | 17.9 | 7  | 23.0 | 16.0 | 10.0 granite |
| 1411 | LCTi-20-T1 | LCTi | 17.9 | 8  | 5.5  | 4.5  | 3.3 granite  |
| 1412 | LCTi-20-T1 | LCTi | 17.9 | 9  | 24.0 | 16.0 | 16.0 granite |
| 1413 | LCTi-20-T1 | LCTi | 17.9 | 10 | 61.0 | 34.0 | 26.0 granite |
| 1414 | LCTi-20-T1 | LCTi | 17.9 | 11 | 31.0 | 22.0 | 13.0 granite |
| 1415 | LCTi-20-T1 | LCTi | 17.9 | 12 | 17.0 | 10.5 | 10.0 granite |
| 1416 | LCTi-20-T1 | LCTi | 17.9 | 13 | 11.5 | 6.0  | 4.0 granite  |
| 1417 | LCTi-20-T1 | LCTi | 17.9 | 14 | 30.0 | 19.0 | 19.0 granite |
| 1418 | LCTi-20-T1 | LCTi | 17.9 | 15 | 11.0 | 8.0  | 7.0 granite  |
| 1419 | LCTi-20-T1 | LCTi | 17.9 | 16 | 62.0 | 34.0 | 30.0 granite |
| 1420 | LCTi-20-T1 | LCTi | 17.9 | 17 | 16.0 | 10.0 | 9.0 granite  |
| 1421 | LCTi-20-T1 | LCTi | 17.9 | 18 | 15.0 | 14.0 | 8.0 granite  |
| 1422 | LCTi-20-T1 | LCTi | 17.9 | 19 | 17.0 | 12.0 | 10.0 granite |
| 1423 | LCTi-20-T1 | LCTi | 17.9 | 20 | 95.0 | 68.0 | 48.0 granite |
| 1424 | LCTi-20-T1 | LCTi | 17.9 | 21 | 23.0 | 17.0 | 10.0 granite |
| 1425 | LCTi-20-T1 | LCTi | 17.9 | 22 | 2.4  | 1.2  | 1.2 granite  |
| 1426 | LCTi-20-T1 | LCTi | 17.9 | 23 | 29.0 | 16.0 | 13.0 granite |
| 1427 | LCTi-20-T1 | LCTi | 17.9 | 24 | 2.1  | 1.1  | 0.8 granite  |
| 1428 | LCTi-20-T1 | LCTi | 17.9 | 25 | 65.0 | 63.0 | 27.0 granite |
| 1429 | LCTi-20-T1 | LCTi | 17.9 | 26 | 1.9  | 1.6  | 0.5 granite  |
| 1430 | LCTi-20-T1 | LCTi | 17.9 | 27 | 5.0  | 4.1  | 1.2 granite  |
| 1431 | LCTi-20-T1 | LCTi | 17.9 | 28 | 96.0 | 52.0 | 35.0 granite |
| 1432 | LCTi-20-T1 | LCTi | 17.9 | 29 | 40.0 | 27.0 | 8.0 granite  |
| 1433 | LCTi-20-T1 | LCTi | 17.9 | 30 | 2.3  | 2.0  | 1.2 granite  |
| 1434 | LCTi-20-T1 | LCTi | 17.9 | 31 | 2.2  | 1.5  | 0.7 granite  |
| 1435 | LCTi-20-T1 | LCTi | 17.9 | 32 | 1.4  | 1.4  | 1.1 granite  |
| 1436 | LCTi-20-T1 | LCTi | 17.9 | 33 | 2.1  | 1.2  | 0.8 granite  |
| 1437 | LCTi-20-T1 | LCTi | 17.9 | 34 | 31.0 | 21.0 | 7.5 granite  |
| 1438 | LCTi-20-T1 | LCTi | 17.9 | 35 | 1.8  | 1.3  | 0.5 granite  |
| 1439 | LCTi-20-T1 | LCTi | 17.9 | 36 | 1.2  | 1.2  | 0.8 granite  |
| 1440 | LCTi-20-T1 | LCTi | 17.9 | 37 | 2.4  | 1.6  | 1.0 granite  |
| 1441 | LCTi-20-T1 | LCTi | 17.9 | 38 | 1.2  | 1.0  | 0.8 granite  |
| 1442 | LCTi-20-T1 | LCTi | 17.9 | 39 | 1.8  | 1.1  | 0.8 granite  |
| 1443 | LCTi-20-T1 | LCTi | 17.9 | 40 | 2.6  | 2.2  | 1.7 granite  |
| 1444 | LCTi-20-T1 | LCTi | 17.9 | 41 | 58.0 | 40.0 | 33.0 granite |
| 1445 | LCTi-20-T1 | LCTi | 17.9 | 42 | 1.8  | 1.2  | 1.1 granite  |
| 1446 | LCTi-20-T1 | LCTi | 17.9 | 43 | 3.7  | 3.3  | 2.5 granite  |
| 1447 | LCTi-20-T1 | LCTi | 17.9 | 44 | 2.4  | 1.2  | 0.5 granite  |
| 1448 | LCTi-20-T1 | LCTi | 17.9 | 45 | 4.3  | 3.2  | 3.0 granite  |
| 1449 | LCTi-20-T1 | LCTi | 17.9 | 46 | 66.0 | 65.0 | 33.0 granite |
| 1450 | LCTi-20-T1 | LCTi | 17.9 | 47 | 4.1  | 3.7  | 2.3 granite  |
| 1451 | LCTi-20-T1 | LCTi | 17.9 | 48 | 45.0 | 20.0 | 27.0 granite |
| 1452 | LCTi-20-T1 | LCTi | 17.9 | 49 | 59.0 | 26.0 | 15.0 granite |
| 1453 | LCTi-20-T1 | LCTi | 17.9 | 50 | 2.3  | 1.3  | 0.7 granite  |
| 1454 | LCTi-20-T1 | LCTi | 17.9 | 51 | 1.8  | 1.2  | 1.2 granite  |

|      |            |      |      |    |       |       |              |
|------|------------|------|------|----|-------|-------|--------------|
| 1455 | LCTi-20-T1 | LCTi | 17.9 | 52 | 23.0  | 19.0  | 10.0 granite |
| 1456 | LCTi-20-T1 | LCTi | 17.9 | 53 | 4.3   | 2.6   | 0.5 granite  |
| 1457 | LCTi-20-T1 | LCTi | 17.9 | 54 | 1.8   | 1.1   | 1.1 granite  |
| 1458 | LCTi-20-T1 | LCTi | 17.9 | 55 | 28.0  | 20.0  | 7.0 granite  |
| 1459 | LCTi-20-T1 | LCTi | 17.9 | 56 | 2.0   | 1.6   | 1.2 granite  |
| 1460 | LCTi-20-T1 | LCTi | 17.9 | 57 | 32.0  | 21.0  | 8.0 granite  |
| 1461 | LCTi-20-T1 | LCTi | 17.9 | 58 | 20.0  | 13.0  | 11.0 granite |
| 1462 | LCTi-20-T1 | LCTi | 17.9 | 59 | 6.8   | 5.7   | 2.3 granite  |
| 1463 | LCTi-20-T1 | LCTi | 17.9 | 60 | 25.0  | 19.0  | 10.0 granite |
| 1464 | LCTi-20-T1 | LCTi | 17.9 | 61 | 2.4   | 2.0   | 1.5 granite  |
| 1465 | LCTi-20-T1 | LCTi | 17.9 | 62 | 2.2   | 1.4   | 1.2 granite  |
| 1466 | LCTi-20-T1 | LCTi | 17.9 | 63 | 8.7   | 6.3   | 4.5 granite  |
| 1467 | LCTi-20-T1 | LCTi | 17.9 | 64 | 28.0  | 24.0  | 11.0 granite |
| 1468 | LCTi-20-T1 | LCTi | 17.9 | 65 | 2.9   | 2.8   | 1.6 granite  |
| 1469 | LCTi-20-T1 | LCTi | 17.9 | 66 | 4.8   | 3.2   | 2.1 granite  |
| 1470 | LCTi-20-T1 | LCTi | 17.9 | 67 | 2.5   | 2.3   | 1.6 granite  |
| 1471 | LCTi-20-T1 | LCTi | 17.9 | 68 | 1.6   | 1.4   | 1.2 granite  |
| 1472 | LCTi-20-T1 | LCTi | 17.9 | 69 | 39.0  | 18.0  | 11.0 granite |
| 1473 | LCTi-20-T1 | LCTi | 17.9 | 70 | 3.4   | 1.2   | 1.1 granite  |
| 1474 | LCTi-20-T1 | LCTi | 17.9 | 71 | 2.0   | 1.3   | 0.9 granite  |
| 1475 | LCTi-20-T1 | LCTi | 17.9 | 72 | 3.6   | 2.3   | 2.2 granite  |
| 1476 | LCTi-20-T1 | LCTi | 17.9 | 73 | 3.2   | 2.0   | 1.2 granite  |
| 1477 | LCTi-20-T1 | LCTi | 17.9 | 74 | 1.2   | 1.2   | 0.6 granite  |
| 1478 | LCTi-20-T1 | LCTi | 17.9 | 75 | 2.4   | 1.6   | 1.4 granite  |
| 1479 | LCTi-20-T1 | LCTi | 17.9 | 76 | 1.2   | 1.0   | 0.6 granite  |
| 1480 | LCTi-20-T1 | LCTi | 17.9 | 77 | 1.7   | 1.7   | 1.3 granite  |
| 1481 | LCTi-20-T1 | LCTi | 17.9 | 78 | 4.5   | 3.6   | 2.4 granite  |
| 1482 | LCTi-20-T1 | LCTi | 17.9 | 79 | 1.5   | 1.3   | 0.8 granite  |
| 1483 | LCTi-20-T1 | LCTi | 17.9 | 80 | 16.0  | 12.0  | 11.0 granite |
| 1484 | LCTi-20-T1 | LCTi | 17.9 | 81 | 5.2   | 4.8   | 1.8 granite  |
| 1485 | LCTi-20-T1 | LCTi | 17.9 | 82 | 2.3   | 2.0   | 1.0 granite  |
| 1486 | LCTi-20-T1 | LCTi | 17.9 | 83 | 39.0  | 18.0  | 12.0 granite |
| 1487 | LCTi-20-T1 | LCTi | 17.9 | 84 | 1.5   | 1.0   | 0.6 granite  |
| 1488 | LCTi-20-T1 | LCTi | 17.9 | 85 | 173.0 | 140.0 | 52.0 granite |
| 1489 | LCTi-20-T1 | LCTi | 17.9 | 86 | 2.7   | 1.3   | 1.2 granite  |
| 1490 | LCTi-20-T1 | LCTi | 17.9 | 87 | 2.3   | 1.4   | 1.2 granite  |
| 1491 | LCTi-20-T1 | LCTi | 17.9 | 88 | 63.0  | 31.0  | 7.0 granite  |
| 1492 | LCTi-20-T1 | LCTi | 17.9 | 89 | 1.3   | 1.2   | 0.3 granite  |
| 1493 | LCTi-20-T1 | LCTi | 17.9 | 90 | 30.0  | 17.0  | 2.0 granite  |
| 1494 | LCTi-20-T1 | LCTi | 17.9 | 91 | 1.4   | 1.0   | 0.8 granite  |
| 1495 | LCTi-20-T1 | LCTi | 17.9 | 92 | 2.0   | 1.7   | 0.7 granite  |
| 1496 | LCTi-20-T1 | LCTi | 17.9 | 93 | 1.8   | 1.5   | 0.6 granite  |
| 1497 | LCTi-20-T1 | LCTi | 17.9 | 94 | 1.9   | 1.2   | 0.7 granite  |
| 1498 | LCTi-20-T1 | LCTi | 17.9 | 95 | 1.2   | 1.2   | 0.3 granite  |
| 1499 | LCTi-20-T1 | LCTi | 17.9 | 96 | 1.3   | 1.1   | 0.5 granite  |
| 1500 | LCTi-20-T1 | LCTi | 17.9 | 97 | 1.8   | 1.2   | 0.8 granite  |
| 1501 | LCTi-20-T1 | LCTi | 17.9 | 98 | 1.2   | 1.1   | 0.7 granite  |

|      |            |      |       |     |     |     |             |
|------|------------|------|-------|-----|-----|-----|-------------|
| 1502 | LCTi-20-T1 | LCTi | 17.9  | 99  | 2.2 | 1.6 | 1.0 granite |
| 1503 | LCTi-20-T1 | LCTi | 17.9  | 100 | 1.4 | 1.3 | 0.4 granite |
| 1504 | BCTa-20-T1 | BCTa | 148.3 | 1   | 1.6 | 1.2 | 1.1 granite |
| 1505 | BCTa-20-T1 | BCTa | 148.3 | 2   | 1.5 | 1.2 | 0.6 granite |
| 1506 | BCTa-20-T1 | BCTa | 148.3 | 3   | 1.5 | 1.0 | 0.9 granite |
| 1507 | BCTa-20-T1 | BCTa | 148.3 | 4   | 1.6 | 1.3 | 0.7 granite |
| 1508 | BCTa-20-T1 | BCTa | 148.3 | 5   | 1.0 | 0.9 | 0.6 granite |
| 1509 | BCTa-20-T1 | BCTa | 148.3 | 6   | 1.7 | 1.6 | 1.2 granite |
| 1510 | BCTa-20-T1 | BCTa | 148.3 | 7   | 2.9 | 1.8 | 1.2 granite |
| 1511 | BCTa-20-T1 | BCTa | 148.3 | 8   | 1.2 | 1.0 | 0.6 granite |
| 1512 | BCTa-20-T1 | BCTa | 148.3 | 9   | 1.2 | 1.0 | 0.4 granite |
| 1513 | BCTa-20-T1 | BCTa | 148.3 | 10  | 1.4 | 1.4 | 0.5 granite |
| 1514 | BCTa-20-T1 | BCTa | 148.3 | 11  | 1.8 | 1.2 | 0.9 granite |
| 1515 | BCTa-20-T1 | BCTa | 148.3 | 12  | 1.2 | 1.0 | 0.6 granite |
| 1516 | BCTa-20-T1 | BCTa | 148.3 | 13  | 1.0 | 1.0 | 0.6 granite |
| 1517 | BCTa-20-T1 | BCTa | 148.3 | 14  | 1.4 | 1.3 | 1.0 granite |
| 1518 | BCTa-20-T1 | BCTa | 148.3 | 15  | 1.3 | 1.2 | 0.6 granite |
| 1519 | BCTa-20-T1 | BCTa | 148.3 | 16  | 1.4 | 1.1 | 0.7 granite |
| 1520 | BCTa-20-T1 | BCTa | 148.3 | 17  | 1.3 | 1.1 | 0.5 granite |
| 1521 | BCTa-20-T1 | BCTa | 148.3 | 18  | 1.6 | 1.5 | 1.1 granite |
| 1522 | BCTa-20-T1 | BCTa | 148.3 | 19  | 1.9 | 1.2 | 0.8 granite |
| 1523 | BCTa-20-T1 | BCTa | 148.3 | 20  | 2.0 | 1.5 | 1.1 granite |
| 1524 | BCTa-20-T1 | BCTa | 148.3 | 21  | 1.1 | 1.1 | 0.8 granite |
| 1525 | BCTa-20-T1 | BCTa | 148.3 | 22  | 1.9 | 1.4 | 1.2 granite |
| 1526 | BCTa-20-T1 | BCTa | 148.3 | 23  | 1.7 | 1.0 | 1.0 granite |
| 1527 | BCTa-20-T1 | BCTa | 148.3 | 24  | 2.0 | 1.2 | 0.6 granite |
| 1528 | BCTa-20-T1 | BCTa | 148.3 | 25  | 1.6 | 1.5 | 0.8 granite |
| 1529 | BCTa-20-T1 | BCTa | 148.3 | 26  | 1.4 | 1.1 | 0.6 granite |
| 1530 | BCTa-20-T1 | BCTa | 148.3 | 27  | 2.2 | 1.3 | 0.9 granite |
| 1531 | BCTa-20-T1 | BCTa | 148.3 | 28  | 1.1 | 1.0 | 0.5 granite |
| 1532 | BCTa-20-T1 | BCTa | 148.3 | 29  | 1.1 | 1.0 | 0.7 granite |
| 1533 | BCTa-20-T1 | BCTa | 148.3 | 30  | 1.8 | 1.4 | 1.3 granite |
| 1534 | BCTa-20-T1 | BCTa | 148.3 | 31  | 3.6 | 2.5 | 2.4 granite |
| 1535 | BCTa-20-T1 | BCTa | 148.3 | 32  | 1.1 | 1.0 | 0.6 granite |
| 1536 | BCTa-20-T1 | BCTa | 148.3 | 33  | 3.5 | 3.1 | 2.4 granite |
| 1537 | BCTa-20-T1 | BCTa | 148.3 | 34  | 1.7 | 1.1 | 0.7 granite |
| 1538 | BCTa-20-T1 | BCTa | 148.3 | 35  | 1.3 | 1.2 | 0.6 granite |
| 1539 | BCTa-20-T1 | BCTa | 148.3 | 36  | 1.2 | 1.0 | 0.7 granite |
| 1540 | BCTa-20-T1 | BCTa | 148.3 | 37  | 1.2 | 1.1 | 0.7 granite |
| 1541 | BCTa-20-T1 | BCTa | 148.3 | 38  | 2.0 | 1.5 | 1.0 granite |
| 1542 | BCTa-20-T1 | BCTa | 148.3 | 39  | 1.3 | 1.0 | 0.9 granite |
| 1543 | BCTa-20-T1 | BCTa | 148.3 | 40  | 1.2 | 1.1 | 1.1 granite |
| 1544 | BCTa-20-T1 | BCTa | 148.3 | 41  | 1.3 | 1.2 | 1.0 granite |
| 1545 | BCTa-20-T1 | BCTa | 148.3 | 42  | 2.0 | 1.6 | 1.4 granite |
| 1546 | BCTa-20-T1 | BCTa | 148.3 | 43  | 1.2 | 1.2 | 0.6 granite |
| 1547 | BCTa-20-T1 | BCTa | 148.3 | 44  | 1.7 | 1.6 | 1.4 granite |
| 1548 | BCTa-20-T1 | BCTa | 148.3 | 45  | 1.0 | 1.0 | 0.8 granite |

|      |            |      |       |    |     |     |             |
|------|------------|------|-------|----|-----|-----|-------------|
| 1549 | BCTa-20-T1 | BCTa | 148.3 | 46 | 1.0 | 1.0 | 0.6 granite |
| 1550 | BCTa-20-T1 | BCTa | 148.3 | 47 | 1.4 | 1.2 | 1.0 granite |
| 1551 | BCTa-20-T1 | BCTa | 148.3 | 48 | 1.8 | 1.4 | 1.1 granite |
| 1552 | BCTa-20-T1 | BCTa | 148.3 | 49 | 1.3 | 1.0 | 0.9 granite |
| 1553 | BCTa-20-T1 | BCTa | 148.3 | 50 | 1.1 | 1.1 | 0.7 granite |
| 1554 | BCTa-20-T1 | BCTa | 148.3 | 51 | 1.0 | 1.0 | 0.7 granite |
| 1555 | BCTa-20-T1 | BCTa | 148.3 | 52 | 1.4 | 1.0 | 0.9 granite |
| 1556 | BCTa-20-T1 | BCTa | 148.3 | 53 | 1.6 | 1.0 | 0.6 granite |
| 1557 | BCTa-20-T1 | BCTa | 148.3 | 54 | 1.0 | 1.0 | 0.8 granite |
| 1558 | BCTa-20-T1 | BCTa | 148.3 | 55 | 1.7 | 1.3 | 1.1 granite |
| 1559 | BCTa-20-T1 | BCTa | 148.3 | 56 | 2.6 | 2.0 | 1.3 granite |
| 1560 | BCTa-20-T1 | BCTa | 148.3 | 57 | 1.8 | 1.6 | 1.2 granite |
| 1561 | BCTa-20-T1 | BCTa | 148.3 | 58 | 1.1 | 1.1 | 1.0 granite |
| 1562 | BCTa-20-T1 | BCTa | 148.3 | 59 | 1.1 | 1.0 | 0.2 granite |
| 1563 | BCTa-20-T1 | BCTa | 148.3 | 60 | 2.0 | 1.4 | 1.1 granite |
| 1564 | BCTa-20-T1 | BCTa | 148.3 | 61 | 1.5 | 1.3 | 0.9 granite |
| 1565 | BCTa-20-T1 | BCTa | 148.3 | 62 | 2.0 | 1.5 | 1.1 granite |
| 1566 | BCTa-20-T1 | BCTa | 148.3 | 63 | 1.5 | 1.0 | 1.0 granite |
| 1567 | BCTa-20-T1 | BCTa | 148.3 | 64 | 1.6 | 1.2 | 0.6 granite |
| 1568 | BCTa-20-T1 | BCTa | 148.3 | 65 | 1.2 | 1.1 | 0.5 granite |
| 1569 | BCTa-20-T1 | BCTa | 148.3 | 66 | 1.6 | 1.2 | 0.8 granite |
| 1570 | BCTa-20-T1 | BCTa | 148.3 | 67 | 1.8 | 1.6 | 1.1 granite |
| 1571 | BCTa-20-T1 | BCTa | 148.3 | 68 | 1.3 | 1.1 | 0.3 granite |
| 1572 | BCTa-20-T1 | BCTa | 148.3 | 69 | 1.1 | 1.1 | 0.6 granite |
| 1573 | BCTa-20-T1 | BCTa | 148.3 | 70 | 1.6 | 1.0 | 0.9 granite |
| 1574 | BCTa-20-T1 | BCTa | 148.3 | 71 | 1.7 | 1.4 | 0.9 granite |
| 1575 | BCTa-20-T1 | BCTa | 148.3 | 72 | 1.2 | 1.0 | 0.6 granite |
| 1576 | BCTa-20-T1 | BCTa | 148.3 | 73 | 1.4 | 1.1 | 0.7 granite |
| 1577 | BCTa-20-T1 | BCTa | 148.3 | 74 | 1.6 | 1.0 | 0.8 granite |
| 1578 | BCTa-20-T1 | BCTa | 148.3 | 75 | 1.1 | 1.0 | 0.8 granite |
| 1579 | BCTa-20-T1 | BCTa | 148.3 | 76 | 1.2 | 1.0 | 0.7 granite |
| 1580 | BCTa-20-T1 | BCTa | 148.3 | 77 | 6.6 | 2.0 | 1.6 granite |
| 1581 | BCTa-20-T1 | BCTa | 148.3 | 78 | 1.8 | 1.2 | 0.9 granite |
| 1582 | BCTa-20-T1 | BCTa | 148.3 | 79 | 2.4 | 1.9 | 1.7 granite |
| 1583 | BCTa-20-T1 | BCTa | 148.3 | 80 | 1.9 | 1.3 | 1.2 granite |
| 1584 | BCTa-20-T1 | BCTa | 148.3 | 81 | 4.8 | 3.0 | 2.8 granite |
| 1585 | BCTa-20-T1 | BCTa | 148.3 | 82 | 2.9 | 1.7 | 0.8 granite |
| 1586 | BCTa-20-T1 | BCTa | 148.3 | 83 | 2.0 | 1.7 | 1.3 granite |
| 1587 | BCTa-20-T1 | BCTa | 148.3 | 84 | 1.3 | 1.1 | 0.8 granite |
| 1588 | BCTa-20-T1 | BCTa | 148.3 | 85 | 5.9 | 3.8 | 2.3 granite |
| 1589 | BCTa-20-T1 | BCTa | 148.3 | 86 | 1.3 | 1.0 | 0.6 granite |
| 1590 | BCTa-20-T1 | BCTa | 148.3 | 87 | 1.5 | 1.2 | 0.9 granite |
| 1591 | BCTa-20-T1 | BCTa | 148.3 | 88 | 1.5 | 1.1 | 0.5 granite |
| 1592 | BCTa-20-T1 | BCTa | 148.3 | 89 | 3.5 | 2.6 | 2.3 granite |
| 1593 | BCTa-20-T1 | BCTa | 148.3 | 90 | 1.3 | 1.3 | 0.4 granite |
| 1594 | BCTa-20-T1 | BCTa | 148.3 | 91 | 1.2 | 1.0 | 0.6 granite |
| 1595 | BCTa-20-T1 | BCTa | 148.3 | 92 | 2.7 | 2.3 | 1.3 granite |

|      |            |       |       |     |      |      |              |
|------|------------|-------|-------|-----|------|------|--------------|
| 1596 | BCTa-20-T1 | BCTa  | 148.3 | 93  | 1.6  | 1.0  | 0.6 granite  |
| 1597 | BCTa-20-T1 | BCTa  | 148.3 | 94  | 1.6  | 1.1  | 0.7 granite  |
| 1598 | BCTa-20-T1 | BCTa  | 148.3 | 95  | 1.3  | 1.0  | 0.7 granite  |
| 1599 | BCTa-20-T1 | BCTa  | 148.3 | 96  | 1.4  | 1.1  | 0.8 granite  |
| 1600 | BCTa-20-T1 | BCTa  | 148.3 | 97  | 4.1  | 2.5  | 2.2 granite  |
| 1601 | BCTa-20-T1 | BCTa  | 148.3 | 98  | 2.1  | 1.7  | 1.3 granite  |
| 1602 | BCTa-20-T1 | BCTa  | 148.3 | 99  | 1.7  | 1.2  | 0.9 granite  |
| 1603 | BCTa-20-T1 | BCTa  | 148.3 | 100 | 2.6  | 2.2  | 2.1 granite  |
| 1604 | LCHT-2     | LCTce | 15    | 1   | 2.0  | 1.5  | 1.4 granite  |
| 1605 | LCHT-2     | LCTce | 15    | 2   | 2.0  | 1.7  | 1.0 granite  |
| 1606 | LCHT-2     | LCTce | 15    | 3   | 55.0 | 33.0 | 31.0 granite |
| 1607 | LCHT-2     | LCTce | 15    | 4   | 4.6  | 3.0  | 1.3 granite  |
| 1608 | LCHT-2     | LCTce | 15    | 5   | 2.5  | 1.6  | 0.6 granite  |
| 1609 | LCHT-2     | LCTce | 15    | 6   | 3.5  | 1.9  | 1.4 granite  |
| 1610 | LCHT-2     | LCTce | 15    | 7   | 4.8  | 3.6  | 1.3 granite  |
| 1611 | LCHT-2     | LCTce | 15    | 8   | 1.8  | 1.1  | 1.1 granite  |
| 1612 | LCHT-2     | LCTce | 15    | 9   | 1.5  | 1.4  | 0.7 granite  |
| 1613 | LCHT-2     | LCTce | 15    | 10  | 1.7  | 1.1  | 0.8 granite  |
| 1614 | LCHT-2     | LCTce | 15    | 11  | 1.8  | 1.5  | 0.6 granite  |
| 1615 | LCHT-2     | LCTce | 15    | 12  | 1.3  | 1.2  | 0.7 granite  |
| 1616 | LCHT-2     | LCTce | 15    | 13  | 1.3  | 1.1  | 0.8 granite  |
| 1617 | LCHT-2     | LCTce | 15    | 14  | 1.1  | 1.1  | 0.7 granite  |
| 1618 | LCHT-2     | LCTce | 15    | 15  | 1.4  | 1.2  | 1.0 granite  |
| 1619 | LCHT-2     | LCTce | 15    | 16  | 1.4  | 1.0  | 0.8 granite  |
| 1620 | LCHT-2     | LCTce | 15    | 17  | 2.2  | 1.5  | 0.3 granite  |
| 1621 | LCHT-2     | LCTce | 15    | 18  | 3.0  | 2.8  | 1.4 granite  |
| 1622 | LCHT-2     | LCTce | 15    | 19  | 1.3  | 1.2  | 0.7 granite  |
| 1623 | LCHT-2     | LCTce | 15    | 20  | 32.0 | 12.0 | 12.0 granite |
| 1624 | LCHT-2     | LCTce | 15    | 21  | 1.4  | 1.1  | 0.9 granite  |
| 1625 | LCHT-2     | LCTce | 15    | 22  | 21.0 | 16.5 | 12.0 granite |
| 1626 | LCHT-2     | LCTce | 15    | 23  | 1.8  | 1.3  | 0.6 granite  |
| 1627 | LCHT-2     | LCTce | 15    | 24  | 3.9  | 3.2  | 1.2 granite  |
| 1628 | LCHT-2     | LCTce | 15    | 25  | 30.0 | 32.0 | 6.0 granite  |
| 1629 | LCHT-2     | LCTce | 15    | 26  | 1.8  | 1.3  | 0.8 granite  |
| 1630 | LCHT-2     | LCTce | 15    | 27  | 2.7  | 1.8  | 0.9 granite  |
| 1631 | LCHT-2     | LCTce | 15    | 28  | 30.0 | 25.0 | 14.0 granite |
| 1632 | LCHT-2     | LCTce | 15    | 29  | 1.2  | 1.0  | 0.2 granite  |
| 1633 | LCHT-2     | LCTce | 15    | 30  | 41.0 | 23.0 | 16.0 granite |
| 1634 | LCHT-2     | LCTce | 15    | 31  | 2.3  | 1.9  | 0.7 granite  |
| 1635 | LCHT-2     | LCTce | 15    | 32  | 2.1  | 1.6  | 1.0 granite  |
| 1636 | LCHT-2     | LCTce | 15    | 33  | 1.6  | 1.3  | 0.7 granite  |
| 1637 | LCHT-2     | LCTce | 15    | 34  | 3.2  | 2.7  | 0.9 granite  |
| 1638 | LCHT-2     | LCTce | 15    | 35  | 1.5  | 1.0  | 0.5 granite  |
| 1639 | LCHT-2     | LCTce | 15    | 36  | 2.2  | 2.0  | 1.5 granite  |
| 1640 | LCHT-2     | LCTce | 15    | 37  | 2.0  | 1.6  | 0.6 granite  |
| 1641 | LCHT-2     | LCTce | 15    | 38  | 29.5 | 9.0  | 11.0 granite |
| 1642 | LCHT-2     | LCTce | 15    | 39  | 1.9  | 1.3  | 0.7 granite  |

|      |        |       |    |    |      |      |              |
|------|--------|-------|----|----|------|------|--------------|
| 1643 | LCHT-2 | LCTce | 15 | 40 | 4.3  | 3.2  | 2.0 granite  |
| 1644 | LCHT-2 | LCTce | 15 | 41 | 3.4  | 1.8  | 1.1 granite  |
| 1645 | LCHT-2 | LCTce | 15 | 42 | 2.3  | 1.6  | 1.2 granite  |
| 1646 | LCHT-2 | LCTce | 15 | 43 | 2.1  | 1.6  | 1.0 granite  |
| 1647 | LCHT-2 | LCTce | 15 | 44 | 5.0  | 3.5  | 1.1 granite  |
| 1648 | LCHT-2 | LCTce | 15 | 45 | 1.3  | 1.1  | 0.4 granite  |
| 1649 | LCHT-2 | LCTce | 15 | 46 | 1.7  | 1.3  | 0.9 granite  |
| 1650 | LCHT-2 | LCTce | 15 | 47 | 1.7  | 1.5  | 1.1 granite  |
| 1651 | LCHT-2 | LCTce | 15 | 48 | 41.0 | 29.0 | 18.0 granite |
| 1652 | LCHT-2 | LCTce | 15 | 49 | 40.0 | 30.0 | 19.0 granite |
| 1653 | LCHT-2 | LCTce | 15 | 50 | 36.0 | 28.0 | 18.0 granite |
| 1654 | LCHT-2 | LCTce | 15 | 51 | 6.5  | 4.8  | 3.0 granite  |
| 1655 | LCHT-2 | LCTce | 15 | 52 | 6.2  | 5.7  | 1.8 granite  |
| 1656 | LCHT-2 | LCTce | 15 | 53 | 24.0 | 20.0 | 9.0 granite  |
| 1657 | LCHT-2 | LCTce | 15 | 54 | 65.0 | 52.0 | 20.0 granite |
| 1658 | LCHT-2 | LCTce | 15 | 55 | 4.0  | 3.1  | 2.2 granite  |
| 1659 | LCHT-2 | LCTce | 15 | 56 | 3.1  | 1.6  | 1.2 granite  |
| 1660 | LCHT-2 | LCTce | 15 | 57 | 1.8  | 1.6  | 1.1 granite  |
| 1661 | LCHT-2 | LCTce | 15 | 58 | 88.0 | 72.0 | 37.0 granite |
| 1662 | LCHT-2 | LCTce | 15 | 59 | 1.9  | 1.5  | 0.7 granite  |
| 1663 | LCHT-2 | LCTce | 15 | 60 | 30.0 | 16.0 | 8.0 granite  |
| 1664 | LCHT-2 | LCTce | 15 | 61 | 5.1  | 4.0  | 2.2 granite  |
| 1665 | LCHT-2 | LCTce | 15 | 62 | 21.0 | 5.0  | 3.5 granite  |
| 1666 | LCHT-2 | LCTce | 15 | 63 | 13.3 | 12.0 | 9.0 granite  |
| 1667 | LCHT-2 | LCTce | 15 | 64 | 24.5 | 19.0 | 13.0 granite |
| 1668 | LCHT-2 | LCTce | 15 | 65 | 8.4  | 2.3  | 1.8 granite  |
| 1669 | LCHT-2 | LCTce | 15 | 66 | 11.2 | 9.5  | 5.0 granite  |
| 1670 | LCHT-2 | LCTce | 15 | 67 | 3.2  | 2.3  | 2.1 granite  |
| 1671 | LCHT-2 | LCTce | 15 | 68 | 4.5  | 3.2  | 2.8 granite  |
| 1672 | LCHT-2 | LCTce | 15 | 69 | 2.3  | 1.1  | 0.6 granite  |
| 1673 | LCHT-2 | LCTce | 15 | 70 | 3.8  | 2.3  | 2.1 granite  |
| 1674 | LCHT-2 | LCTce | 15 | 71 | 34.0 | 17.0 | 12.0 granite |
| 1675 | LCHT-2 | LCTce | 15 | 72 | 9.3  | 7.6  | 3.0 granite  |
| 1676 | LCHT-2 | LCTce | 15 | 73 | 39.0 | 29.0 | 21.0 granite |
| 1677 | LCHT-2 | LCTce | 15 | 74 | 11.0 | 8.5  | 3.5 granite  |
| 1678 | LCHT-2 | LCTce | 15 | 75 | 17.0 | 10.5 | 4.0 granite  |
| 1679 | LCHT-2 | LCTce | 15 | 76 | 22.0 | 19.0 | 14.0 granite |
| 1680 | LCHT-2 | LCTce | 15 | 77 | 26.0 | 25.0 | 12.0 granite |
| 1681 | LCHT-2 | LCTce | 15 | 78 | 10.0 | 7.6  | 6.0 granite  |
| 1682 | LCHT-2 | LCTce | 15 | 79 | 22.0 | 17.0 | 7.0 granite  |
| 1683 | LCHT-2 | LCTce | 15 | 80 | 14.5 | 11.5 | 7.0 granite  |
| 1684 | LCHT-2 | LCTce | 15 | 81 | 15.0 | 9.5  | 4.0 granite  |
| 1685 | LCHT-2 | LCTce | 15 | 82 | 11.7 | 6.8  | 6.5 granite  |
| 1686 | LCHT-2 | LCTce | 15 | 83 | 59.0 | 54.0 | 41.0 granite |
| 1687 | LCHT-2 | LCTce | 15 | 84 | 64.0 | 45.0 | 41.0 granite |
| 1688 | LCHT-2 | LCTce | 15 | 85 | 1.5  | 1.2  | 0.5 granite  |
| 1689 | LCHT-2 | LCTce | 15 | 86 | 3.8  | 2.7  | 2.6 granite  |

|      |              |        |    |     |      |      |              |
|------|--------------|--------|----|-----|------|------|--------------|
| 1690 | LCHT-2       | LCTce  | 15 | 87  | 28.0 | 11.5 | 6.0 granite  |
| 1691 | LCHT-2       | LCTce  | 15 | 88  | 2.1  | 1.7  | 0.8 granite  |
| 1692 | LCHT-2       | LCTce  | 15 | 89  | 51.0 | 45.0 | 18.0 granite |
| 1693 | LCHT-2       | LCTce  | 15 | 90  | 40.0 | 24.0 | 12.0 granite |
| 1694 | LCHT-2       | LCTce  | 15 | 91  | 1.4  | 1.0  | 0.6 granite  |
| 1695 | LCHT-2       | LCTce  | 15 | 92  | 21.0 | 18.0 | 13.0 granite |
| 1696 | LCHT-2       | LCTce  | 15 | 93  | 2.1  | 1.8  | 1.5 granite  |
| 1697 | LCHT-2       | LCTce  | 15 | 94  | 4.7  | 4.0  | 2.0 granite  |
| 1698 | LCHT-2       | LCTce  | 15 | 95  | 1.5  | 1.5  | 0.5 granite  |
| 1699 | LCHT-2       | LCTce  | 15 | 96  | 2.3  | 1.3  | 1.3 granite  |
| 1700 | LCHT-2       | LCTce  | 15 | 97  | 1.5  | 1.4  | 0.8 granite  |
| 1701 | LCHT-2       | LCTce  | 15 | 98  | 2.4  | 2.0  | 1.4 granite  |
| 1702 | LCHT-2       | LCTce  | 15 | 99  | 29.0 | 21.0 | 15.0 granite |
| 1703 | LCHT-2       | LCTce  | 15 | 100 | 1.8  | 1.5  | 1.3 granite  |
| 1704 | PrM-21-Q6-T1 | PrM-Q6 | 5  | 1   | 8.2  | 5.0  | 4.5 granite  |
| 1705 | PrM-21-Q6-T1 | PrM-Q6 | 5  | 2   | 2.7  | 1.5  | 0.6 granite  |
| 1706 | PrM-21-Q6-T1 | PrM-Q6 | 5  | 3   | 17.0 | 9.5  | 7.2 granite  |
| 1707 | PrM-21-Q6-T1 | PrM-Q6 | 5  | 4   | 35.5 | 16.0 | 17.5 granite |
| 1708 | PrM-21-Q6-T1 | PrM-Q6 | 5  | 5   | 30.5 | 28.0 | 28.0 granite |
| 1709 | PrM-21-Q6-T1 | PrM-Q6 | 5  | 6   | 12.5 | 12.0 | 12.0 granite |
| 1710 | PrM-21-Q6-T1 | PrM-Q6 | 5  | 7   | 27.5 | 27.5 | 14.0 granite |
| 1711 | PrM-21-Q6-T1 | PrM-Q6 | 5  | 8   | 8.5  | 6.5  | 5.0 granite  |
| 1712 | PrM-21-Q6-T1 | PrM-Q6 | 5  | 9   | 7.8  | 5.5  | 5.0 granite  |
| 1713 | PrM-21-Q6-T1 | PrM-Q6 | 5  | 10  | 38.0 | 13.0 | 12.0 granite |
| 1714 | PrM-21-Q6-T1 | PrM-Q6 | 5  | 11  | 21.5 | 6.0  | 5.5 granite  |
| 1715 | PrM-21-Q6-T1 | PrM-Q6 | 5  | 12  | 33.0 | 27.0 | 12.0 granite |
| 1716 | PrM-21-Q6-T1 | PrM-Q6 | 5  | 13  | 2.1  | 1.5  | 0.9 granite  |
| 1717 | PrM-21-Q6-T1 | PrM-Q6 | 5  | 14  | 2.8  | 2.0  | 1.0 granite  |
| 1718 | PrM-21-Q6-T1 | PrM-Q6 | 5  | 15  | 16.0 | 9.8  | 3.6 granite  |
| 1719 | PrM-21-Q6-T1 | PrM-Q6 | 5  | 16  | 2.8  | 2.0  | 1.2 granite  |
| 1720 | PrM-21-Q6-T1 | PrM-Q6 | 5  | 17  | 2.6  | 1.8  | 1.3 granite  |
| 1721 | PrM-21-Q6-T1 | PrM-Q6 | 5  | 18  | 1.5  | 1.2  | 0.7 granite  |
| 1722 | PrM-21-Q6-T1 | PrM-Q6 | 5  | 19  | 1.7  | 1.5  | 1.0 granite  |
| 1723 | PrM-21-Q6-T1 | PrM-Q6 | 5  | 20  | 15.0 | 1.2  | 1.0 granite  |
| 1724 | PrM-21-Q6-T1 | PrM-Q6 | 5  | 21  | 7.0  | 5.0  | 2.8 granite  |
| 1725 | PrM-21-Q6-T1 | PrM-Q6 | 5  | 22  | 2.4  | 2.3  | 1.6 granite  |
| 1726 | PrM-21-Q6-T1 | PrM-Q6 | 5  | 23  | 1.4  | 1.0  | 0.8 granite  |
| 1727 | PrM-21-Q6-T1 | PrM-Q6 | 5  | 24  | 14.3 | 9.8  | 7.2 granite  |
| 1728 | PrM-21-Q6-T1 | PrM-Q6 | 5  | 25  | 8.7  | 6.2  | 4.5 granite  |
| 1729 | PrM-21-Q6-T1 | PrM-Q6 | 5  | 26  | 1.7  | 1.2  | 0.5 granite  |
| 1730 | PrM-21-Q6-T1 | PrM-Q6 | 5  | 27  | 2.0  | 1.5  | 1.2 granite  |
| 1731 | PrM-21-Q6-T1 | PrM-Q6 | 5  | 28  | 39.5 | 19.0 | 18.0 granite |
| 1732 | PrM-21-Q6-T1 | PrM-Q6 | 5  | 29  | 2.0  | 1.2  | 1.0 granite  |
| 1733 | PrM-21-Q6-T1 | PrM-Q6 | 5  | 30  | 26.5 | 18.5 | 10.5 granite |
| 1734 | PrM-21-Q6-T1 | PrM-Q6 | 5  | 31  | 2.7  | 1.4  | 1.3 granite  |
| 1735 | PrM-21-Q6-T1 | PrM-Q6 | 5  | 32  | 25.0 | 19.0 | 7.0 granite  |
| 1736 | PrM-21-Q6-T1 | PrM-Q6 | 5  | 33  | 21.0 | 14.5 | 12.0 granite |

|      |              |        |   |    |      |      |                |
|------|--------------|--------|---|----|------|------|----------------|
| 1737 | PrM-21-Q6-T1 | PrM-Q6 | 5 | 34 | 1.1  | 1.0  | 0.6 granite    |
| 1738 | PrM-21-Q6-T1 | PrM-Q6 | 5 | 35 | 14.5 | 11.5 | 5.0 volcanic   |
| 1739 | PrM-21-Q6-T1 | PrM-Q6 | 5 | 36 | 16.0 | 11.0 | 7.0 volcanic   |
| 1740 | PrM-21-Q6-T1 | PrM-Q6 | 5 | 37 | 5.3  | 5.0  | 2.8 volcanic   |
| 1741 | PrM-21-Q6-T1 | PrM-Q6 | 5 | 38 | 19.0 | 15.0 | 6.0 volcanic   |
| 1742 | PrM-21-Q6-T1 | PrM-Q6 | 5 | 39 | 35.0 | 25.0 | 25.0 volcanic  |
| 1743 | PrM-21-Q6-T1 | PrM-Q6 | 5 | 40 | 29.0 | 23.0 | 9.5 volcanic   |
| 1744 | PrM-21-Q6-T1 | PrM-Q6 | 5 | 41 | 1.3  | 1.2  | 0.2 volcanic   |
| 1745 | PrM-21-Q6-T1 | PrM-Q6 | 5 | 42 | 33.0 | 22.0 | 20.0 volcanic  |
| 1746 | PrM-21-Q6-T1 | PrM-Q6 | 5 | 43 | 21.5 | 19.0 | 10.5 volcanic  |
| 1747 | PrM-21-Q6-T1 | PrM-Q6 | 5 | 44 | 8.5  | 7.3  | 5.5 volcanic   |
| 1748 | PrM-21-Q6-T1 | PrM-Q6 | 5 | 45 | 24.0 | 20.0 | 10.0 volcanic  |
| 1749 | PrM-21-Q6-T1 | PrM-Q6 | 5 | 46 | 32.0 | 18.0 | 16.5 volcanic  |
| 1750 | PrM-21-Q6-T1 | PrM-Q6 | 5 | 47 | 29.0 | 29.0 | 24.0 volcanic  |
| 1751 | PrM-21-Q6-T1 | PrM-Q6 | 5 | 48 | 36.5 | 24.0 | 12.0 volcanic  |
| 1752 | PrM-21-Q6-T1 | PrM-Q6 | 5 | 49 | 2.0  | 1.5  | 0.9 volcanic   |
| 1753 | PrM-21-Q6-T1 | PrM-Q6 | 5 | 50 | 6.0  | 4.5  | 2.5 volcanic   |
| 1754 | PrM-21-Q6-T1 | PrM-Q6 | 5 | 51 | 1.2  | 1.0  | 0.3 volcanic   |
| 1755 | PrM-21-Q6-T1 | PrM-Q6 | 5 | 52 | 1.7  | 1.5  | 1.0 volcanic   |
| 1756 | PrM-21-Q6-T1 | PrM-Q6 | 5 | 53 | 27.0 | 17.5 | 21.0 volcanic  |
| 1757 | PrM-21-Q6-T1 | PrM-Q6 | 5 | 54 | 3.8  | 3.0  | 1.5 volcanic   |
| 1758 | PrM-21-Q6-T1 | PrM-Q6 | 5 | 55 | 8.5  | 6.7  | 5.0 volcanic   |
| 1759 | PrM-21-Q6-T1 | PrM-Q6 | 5 | 56 | 22.0 | 12.5 | 17.0 volcanic  |
| 1760 | PrM-21-Q6-T1 | PrM-Q6 | 5 | 57 | 18.0 | 16.0 | 3.3 volcanic   |
| 1761 | PrM-21-Q6-T1 | PrM-Q6 | 5 | 58 | 14.5 | 11.5 | 8.3 volcanic   |
| 1762 | PrM-21-Q6-T1 | PrM-Q6 | 5 | 59 | 15.0 | 8.0  | 7.5 volcanic   |
| 1763 | PrM-21-Q6-T1 | PrM-Q6 | 5 | 60 | 4.3  | 3.1  | 0.6 volcanic   |
| 1764 | PrM-21-Q6-T1 | PrM-Q6 | 5 | 61 | 1.7  | 1.2  | 0.2 volcanic   |
| 1765 | PrM-21-Q6-T1 | PrM-Q6 | 5 | 62 | 58.0 | 35.0 | 27.0 volcanic  |
| 1766 | PrM-21-Q6-T1 | PrM-Q6 | 5 | 63 | 2.4  | 2.0  | 1.5 volcanic   |
| 1767 | PrM-21-Q6-T1 | PrM-Q6 | 5 | 64 | 8.5  | 5.5  | 3.5 volcanic   |
| 1768 | PrM-21-Q6-T1 | PrM-Q6 | 5 | 65 | 2.3  | 1.5  | 1.2 volcanic   |
| 1769 | PrM-21-Q6-T1 | PrM-Q6 | 5 | 66 | 4.8  | 3.7  | 2.3 volcanic   |
| 1770 | PrM-21-Q6-T1 | PrM-Q6 | 5 | 67 | 9.5  | 8.0  | 6.0 volcanic   |
| 1771 | PrM-21-Q6-T1 | PrM-Q6 | 5 | 68 | 62.0 | 48.0 | 28.0 volcanic  |
| 1772 | PrM-21-Q6-T1 | PrM-Q6 | 5 | 69 | 20.5 | 11.5 | 9.3 carbonate  |
| 1773 | PrM-21-Q6-T1 | PrM-Q6 | 5 | 70 | 15.0 | 11.0 | 9.0 carbonate  |
| 1774 | PrM-21-Q6-T1 | PrM-Q6 | 5 | 71 | 14.0 | 11.8 | 7.5 carbonate  |
| 1775 | PrM-21-Q6-T1 | PrM-Q6 | 5 | 72 | 2.4  | 2.4  | 1.5 carbonate  |
| 1776 | PrM-21-Q6-T1 | PrM-Q6 | 5 | 73 | 4.3  | 2.7  | 1.2 carbonate  |
| 1777 | PrM-21-Q6-T1 | PrM-Q6 | 5 | 74 | 17.5 | 12.0 | 8.0 carbonate  |
| 1778 | PrM-21-Q6-T1 | PrM-Q6 | 5 | 75 | 28.5 | 18.0 | 15.0 carbonate |
| 1779 | PrM-21-Q6-T1 | PrM-Q6 | 5 | 76 | 14.5 | 7.0  | 1.5 carbonate  |
| 1780 | PrM-21-Q6-T1 | PrM-Q6 | 5 | 77 | 6.5  | 5.7  | 2.8 carbonate  |
| 1781 | PrM-21-Q6-T1 | PrM-Q6 | 5 | 78 | 2.5  | 1.8  | 1.0 carbonate  |
| 1782 | PrM-21-Q6-T1 | PrM-Q6 | 5 | 79 | 1.3  | 1.1  | 0.8 carbonate  |
| 1783 | PrM-21-Q6-T1 | PrM-Q6 | 5 | 80 | 40.0 | 23.0 | 18.0 carbonate |

|      |              |        |   |     |      |      |                |
|------|--------------|--------|---|-----|------|------|----------------|
| 1784 | PrM-21-Q6-T1 | PrM-Q6 | 5 | 81  | 1.9  | 1.0  | 0.5 carbonate  |
| 1785 | PrM-21-Q6-T1 | PrM-Q6 | 5 | 82  | 17.0 | 15.0 | 8.0 carbonate  |
| 1786 | PrM-21-Q6-T1 | PrM-Q6 | 5 | 83  | 21.5 | 14.0 | 12.0 carbonate |
| 1787 | PrM-21-Q6-T1 | PrM-Q6 | 5 | 84  | 3.1  | 1.6  | 0.5 carbonate  |
| 1788 | PrM-21-Q6-T1 | PrM-Q6 | 5 | 85  | 2.3  | 1.1  | 0.5 carbonate  |
| 1789 | PrM-21-Q6-T1 | PrM-Q6 | 5 | 86  | 2.3  | 1.6  | 0.8 carbonate  |
| 1790 | PrM-21-Q6-T1 | PrM-Q6 | 5 | 87  | 8.5  | 3.5  | 3.5 carbonate  |
| 1791 | PrM-21-Q6-T1 | PrM-Q6 | 5 | 88  | 9.4  | 6.2  | 2.0 carbonate  |
| 1792 | PrM-21-Q6-T1 | PrM-Q6 | 5 | 89  | 26.0 | 20.0 | 16.0 carbonate |
| 1793 | PrM-21-Q6-T1 | PrM-Q6 | 5 | 90  | 2.2  | 1.2  | 0.8 carbonate  |
| 1794 | PrM-21-Q6-T1 | PrM-Q6 | 5 | 91  | 8.0  | 5.0  | 2.5 carbonate  |
| 1795 | PrM-21-Q6-T1 | PrM-Q6 | 5 | 92  | 1.5  | 1.3  | 0.5 carbonate  |
| 1796 | PrM-21-Q6-T1 | PrM-Q6 | 5 | 93  | 3.7  | 2.7  | 0.6 carbonate  |
| 1797 | PrM-21-Q6-T1 | PrM-Q6 | 5 | 94  | 2.5  | 2.0  | 0.8 carbonate  |
| 1798 | PrM-21-Q6-T1 | PrM-Q6 | 5 | 95  | 5.2  | 4.0  | 2.5 carbonate  |
| 1799 | PrM-21-Q6-T1 | PrM-Q6 | 5 | 96  | 9.5  | 7.5  | 4.5 carbonate  |
| 1800 | PrM-21-Q6-T1 | PrM-Q6 | 5 | 97  | 4.8  | 3.0  | 1.7 carbonate  |
| 1801 | PrM-21-Q6-T1 | PrM-Q6 | 5 | 98  | 7.0  | 6.0  | 3.0 carbonate  |
| 1802 | PrM-21-Q6-T1 | PrM-Q6 | 5 | 99  | 4.7  | 1.5  | 0.7 carbonate  |
| 1803 | PrM-21-Q6-T2 | PrM-Q6 | 5 | 100 | 2.4  | 1.2  | 1.0 granite    |
| 1804 | PrM-21-Q6-T2 | PrM-Q6 | 5 | 101 | 1.7  | 1.2  | 0.7 granite    |
| 1805 | PrM-21-Q6-T2 | PrM-Q6 | 5 | 102 | 33.0 | 27.0 | 20.0 granite   |
| 1806 | PrM-21-Q6-T2 | PrM-Q6 | 5 | 103 | 1.1  | 1.0  | 0.6 granite    |
| 1807 | PrM-21-Q6-T2 | PrM-Q6 | 5 | 104 | 8.1  | 7.5  | 3.5 granite    |
| 1808 | PrM-21-Q6-T2 | PrM-Q6 | 5 | 105 | 12.2 | 6.6  | 5.8 granite    |
| 1809 | PrM-21-Q6-T2 | PrM-Q6 | 5 | 106 | 19.5 | 13.0 | 9.5 granite    |
| 1810 | PrM-21-Q6-T2 | PrM-Q6 | 5 | 107 | 1.3  | 1.0  | 0.6 granite    |
| 1811 | PrM-21-Q6-T2 | PrM-Q6 | 5 | 108 | 3.0  | 2.2  | 1.8 granite    |
| 1812 | PrM-21-Q6-T2 | PrM-Q6 | 5 | 109 | 1.7  | 1.0  | 0.6 granite    |
| 1813 | PrM-21-Q6-T2 | PrM-Q6 | 5 | 110 | 2.3  | 1.6  | 1.0 granite    |
| 1814 | PrM-21-Q6-T2 | PrM-Q6 | 5 | 111 | 36.0 | 28.0 | 21.0 granite   |
| 1815 | PrM-21-Q6-T2 | PrM-Q6 | 5 | 112 | 1.1  | 1.0  | 0.6 granite    |
| 1816 | PrM-21-Q6-T2 | PrM-Q6 | 5 | 113 | 1.6  | 1.1  | 0.8 granite    |
| 1817 | PrM-21-Q6-T2 | PrM-Q6 | 5 | 114 | 1.7  | 1.6  | 0.8 granite    |
| 1818 | PrM-21-Q6-T2 | PrM-Q6 | 5 | 115 | 1.6  | 1.0  | 0.7 granite    |
| 1819 | PrM-21-Q6-T2 | PrM-Q6 | 5 | 116 | 1.3  | 1.0  | 1.0 granite    |
| 1820 | PrM-21-Q6-T2 | PrM-Q6 | 5 | 117 | 17.0 | 16.0 | 7.5 granite    |
| 1821 | PrM-21-Q6-T2 | PrM-Q6 | 5 | 118 | 18.5 | 13.0 | 6.5 granite    |
| 1822 | PrM-21-Q6-T2 | PrM-Q6 | 5 | 119 | 5.0  | 4.8  | 3.2 granite    |
| 1823 | PrM-21-Q6-T2 | PrM-Q6 | 5 | 120 | 13.5 | 7.5  | 1.5 granite    |
| 1824 | PrM-21-Q6-T2 | PrM-Q6 | 5 | 121 | 17.5 | 14.5 | 11.0 granite   |
| 1825 | PrM-21-Q6-T2 | PrM-Q6 | 5 | 122 | 3.0  | 1.1  | 0.6 volcanic   |
| 1826 | PrM-21-Q6-T2 | PrM-Q6 | 5 | 123 | 12.0 | 10.0 | 6.5 volcanic   |
| 1827 | PrM-21-Q6-T2 | PrM-Q6 | 5 | 124 | 12.0 | 8.0  | 6.0 volcanic   |
| 1828 | PrM-21-Q6-T2 | PrM-Q6 | 5 | 125 | 2.2  | 1.0  | 0.7 volcanic   |
| 1829 | PrM-21-Q6-T2 | PrM-Q6 | 5 | 126 | 6.3  | 54.6 | 2.0 volcanic   |
| 1830 | PrM-21-Q6-T2 | PrM-Q6 | 5 | 127 | 1.2  | 1.1  | 0.7 volcanic   |

|      |              |        |   |     |      |      |      |           |
|------|--------------|--------|---|-----|------|------|------|-----------|
| 1831 | PrM-21-Q6-T2 | PrM-Q6 | 5 | 128 | 23.0 | 19.0 | 14.0 | volcanic  |
| 1832 | PrM-21-Q6-T2 | PrM-Q6 | 5 | 129 | 12.5 | 8.5  | 6.5  | volcanic  |
| 1833 | PrM-21-Q6-T2 | PrM-Q6 | 5 | 130 | 5.8  | 5.3  | 2.2  | volcanic  |
| 1834 | PrM-21-Q6-T2 | PrM-Q6 | 5 | 131 | 7.2  | 5.0  | 3.3  | volcanic  |
| 1835 | PrM-21-Q6-T2 | PrM-Q6 | 5 | 132 | 8.8  | 5.8  | 3.2  | volcanic  |
| 1836 | PrM-21-Q6-T2 | PrM-Q6 | 5 | 133 | 2.4  | 1.1  | 0.4  | volcanic  |
| 1837 | PrM-21-Q6-T2 | PrM-Q6 | 5 | 134 | 3.0  | 2.0  | 0.8  | volcanic  |
| 1838 | PrM-21-Q6-T2 | PrM-Q6 | 5 | 135 | 2.2  | 1.5  | 1.2  | volcanic  |
| 1839 | PrM-21-Q6-T2 | PrM-Q6 | 5 | 136 | 30.5 | 25.0 | 15.0 | volcanic  |
| 1840 | PrM-21-Q6-T2 | PrM-Q6 | 5 | 137 | 14.5 | 11.0 | 9.0  | volcanic  |
| 1841 | PrM-21-Q6-T2 | PrM-Q6 | 5 | 138 | 39.5 | 35.5 | 15.5 | volcanic  |
| 1842 | PrM-21-Q6-T2 | PrM-Q6 | 5 | 139 | 23.5 | 16.5 | 12.5 | volcanic  |
| 1843 | PrM-21-Q6-T2 | PrM-Q6 | 5 | 140 | 35.5 | 16.0 | 15.5 | volcanic  |
| 1844 | PrM-21-Q6-T2 | PrM-Q6 | 5 | 141 | 32.0 | 23.0 | 17.0 | volcanic  |
| 1845 | PrM-21-Q6-T2 | PrM-Q6 | 5 | 142 | 10.8 | 10.5 | 4.0  | volcanic  |
| 1846 | PrM-21-Q6-T2 | PrM-Q6 | 5 | 143 | 2.0  | 1.8  | 0.8  | carbonate |
| 1847 | PrM-21-Q6-T2 | PrM-Q6 | 5 | 144 | 9.7  | 8.0  | 5.0  | carbonate |
| 1848 | PrM-21-Q6-T2 | PrM-Q6 | 5 | 145 | 1.7  | 1.0  | 0.8  | carbonate |
| 1849 | PrM-21-Q6-T2 | PrM-Q6 | 5 | 146 | 35.5 | 19.0 | 17.0 | carbonate |
| 1850 | PrM-21-Q6-T2 | PrM-Q6 | 5 | 147 | 7.0  | 4.0  | 1.2  | carbonate |
| 1851 | PrM-21-Q6-T2 | PrM-Q6 | 5 | 148 | 1.7  | 1.2  | 1.0  | carbonate |
| 1852 | PrM-21-Q6-T2 | PrM-Q6 | 5 | 149 | 1.7  | 1.1  | 0.5  | carbonate |
| 1853 | PrM-21-Q6-T2 | PrM-Q6 | 5 | 150 | 1.4  | 1.2  | 0.6  | carbonate |
| 1854 | PrM-21-Q6-T2 | PrM-Q6 | 5 | 151 | 12.0 | 7.6  | 3.8  | carbonate |
| 1855 | PrM-21-Q6-T2 | PrM-Q6 | 5 | 152 | 2.7  | 2.4  | 1.8  | carbonate |
| 1856 | PrM-21-Q6-T2 | PrM-Q6 | 5 | 153 | 1.5  | 1.0  | 0.6  | carbonate |
| 1857 | PrM-21-Q6-T2 | PrM-Q6 | 5 | 154 | 2.2  | 1.7  | 1.0  | carbonate |
| 1858 | PrM-21-Q6-T2 | PrM-Q6 | 5 | 155 | 3.5  | 2.5  | 1.5  | carbonate |
| 1859 | PrM-21-Q6-T2 | PrM-Q6 | 5 | 156 | 1.6  | 1.1  | 0.6  | carbonate |
| 1860 | PrM-21-Q6-T2 | PrM-Q6 | 5 | 157 | 21.5 | 19.0 | 13.5 | carbonate |
| 1861 | PrM-21-Q6-T2 | PrM-Q6 | 5 | 158 | 2.0  | 1.2  | 0.8  | carbonate |
| 1862 | PrM-21-Q6-T2 | PrM-Q6 | 5 | 159 | 19.5 | 21.0 | 18.5 | carbonate |
| 1863 | PrM-21-Q6-T2 | PrM-Q6 | 5 | 160 | 1.5  | 1.1  | 1.0  | carbonate |
| 1864 | PrM-21-Q6-T2 | PrM-Q6 | 5 | 161 | 9.0  | 9.0  | 7.5  | carbonate |
| 1865 | PrM-21-Q6-T2 | PrM-Q6 | 5 | 162 | 3.5  | 2.0  | 1.8  | carbonate |
| 1866 | PrM-21-MW-T1 | PrM-MW | 0 | 1   | 31.5 | 22.0 | 20.0 | granite   |
| 1867 | PrM-21-MW-T1 | PrM-MW | 0 | 2   | 3.8  | 2.7  | 2.5  | granite   |
| 1868 | PrM-21-MW-T1 | PrM-MW | 0 | 3   | 12.0 | 12.0 | 6.0  | granite   |
| 1869 | PrM-21-MW-T1 | PrM-MW | 0 | 4   | 26.0 | 21.0 | 20.5 | granite   |
| 1870 | PrM-21-MW-T1 | PrM-MW | 0 | 5   | 11.0 | 8.2  | 3.0  | granite   |
| 1871 | PrM-21-MW-T1 | PrM-MW | 0 | 6   | 2.6  | 2.4  | 1.5  | granite   |
| 1872 | PrM-21-MW-T1 | PrM-MW | 0 | 7   | 2.0  | 1.2  | 1.0  | granite   |
| 1873 | PrM-21-MW-T1 | PrM-MW | 0 | 8   | 8.2  | 6.5  | 5.0  | granite   |
| 1874 | PrM-21-MW-T1 | PrM-MW | 0 | 9   | 3.4  | 2.7  | 2.5  | granite   |
| 1875 | PrM-21-MW-T1 | PrM-MW | 0 | 10  | 1.7  | 1.2  | 0.8  | granite   |
| 1876 | PrM-21-MW-T1 | PrM-MW | 0 | 11  | 1.6  | 1.5  | 0.5  | granite   |
| 1877 | PrM-21-MW-T1 | PrM-MW | 0 | 12  | 1.1  | 1.0  | 0.8  | granite   |

|      |              |        |   |    |      |      |                |
|------|--------------|--------|---|----|------|------|----------------|
| 1878 | PrM-21-MW-T1 | PrM-MW | 0 | 13 | 15.0 | 13.0 | 8.5 granite    |
| 1879 | PrM-21-MW-T1 | PrM-MW | 0 | 14 | 10.5 | 7.0  | 5.0 granite    |
| 1880 | PrM-21-MW-T1 | PrM-MW | 0 | 15 | 7.0  | 6.5  | 3.5 granite    |
| 1881 | PrM-21-MW-T1 | PrM-MW | 0 | 16 | 7.5  | 6.5  | 5.0 granite    |
| 1882 | PrM-21-MW-T1 | PrM-MW | 0 | 17 | 8.0  | 6.5  | 6.0 granite    |
| 1883 | PrM-21-MW-T1 | PrM-MW | 0 | 18 | 6.0  | 4.0  | 2.5 granite    |
| 1884 | PrM-21-MW-T1 | PrM-MW | 0 | 19 | 4.6  | 3.0  | 2.5 granite    |
| 1885 | PrM-21-MW-T1 | PrM-MW | 0 | 20 | 4.6  | 3.5  | 2.8 granite    |
| 1886 | PrM-21-MW-T1 | PrM-MW | 0 | 21 | 7.5  | 6.5  | 6.0 granite    |
| 1887 | PrM-21-MW-T1 | PrM-MW | 0 | 22 | 1.6  | 1.2  | 0.7 granite    |
| 1888 | PrM-21-MW-T1 | PrM-MW | 0 | 23 | 7.5  | 4.0  | 3.0 granite    |
| 1889 | PrM-21-MW-T1 | PrM-MW | 0 | 24 | 12.5 | 9.0  | 5.5 granite    |
| 1890 | PrM-21-MW-T1 | PrM-MW | 0 | 25 | 1.1  | 1.0  | 0.5 granite    |
| 1891 | PrM-21-MW-T1 | PrM-MW | 0 | 26 | 7.5  | 5.0  | 3.5 volcanic   |
| 1892 | PrM-21-MW-T1 | PrM-MW | 0 | 27 | 23.0 | 14.0 | 12.5 volcanic  |
| 1893 | PrM-21-MW-T1 | PrM-MW | 0 | 28 | 22.0 | 14.0 | 7.5 volcanic   |
| 1894 | PrM-21-MW-T1 | PrM-MW | 0 | 29 | 17.0 | 10.5 | 9.0 volcanic   |
| 1895 | PrM-21-MW-T1 | PrM-MW | 0 | 30 | 4.4  | 2.2  | 1.5 volcanic   |
| 1896 | PrM-21-MW-T1 | PrM-MW | 0 | 31 | 21.0 | 14.0 | 12.0 volcanic  |
| 1897 | PrM-21-MW-T1 | PrM-MW | 0 | 32 | 2.0  | 1.0  | 0.8 volcanic   |
| 1898 | PrM-21-MW-T1 | PrM-MW | 0 | 33 | 19.0 | 13.0 | 10.0 volcanic  |
| 1899 | PrM-21-MW-T1 | PrM-MW | 0 | 34 | 29.0 | 16.0 | 14.0 volcanic  |
| 1900 | PrM-21-MW-T1 | PrM-MW | 0 | 35 | 2.8  | 2.7  | 2.0 volcanic   |
| 1901 | PrM-21-MW-T1 | PrM-MW | 0 | 36 | 1.6  | 1.2  | 1.2 volcanic   |
| 1902 | PrM-21-MW-T1 | PrM-MW | 0 | 37 | 4.7  | 4.6  | 2.5 volcanic   |
| 1903 | PrM-21-MW-T1 | PrM-MW | 0 | 38 | 2.0  | 1.5  | 0.8 volcanic   |
| 1904 | PrM-21-MW-T1 | PrM-MW | 0 | 39 | 14.0 | 11.5 | 8.0 volcanic   |
| 1905 | PrM-21-MW-T1 | PrM-MW | 0 | 40 | 8.0  | 4.0  | 4.5 volcanic   |
| 1906 | PrM-21-MW-T1 | PrM-MW | 0 | 41 | 10.5 | 6.0  | 5.5 volcanic   |
| 1907 | PrM-21-MW-T1 | PrM-MW | 0 | 42 | 5.5  | 4.5  | 4.0 volcanic   |
| 1908 | PrM-21-MW-T1 | PrM-MW | 0 | 43 | 9.0  | 7.0  | 6.5 volcanic   |
| 1909 | PrM-21-MW-T1 | PrM-MW | 0 | 44 | 1.8  | 1.0  | 0.9 volcanic   |
| 1910 | PrM-21-MW-T1 | PrM-MW | 0 | 45 | 36.0 | 24.0 | 14.0 volcanic  |
| 1911 | PrM-21-MW-T1 | PrM-MW | 0 | 46 | 2.8  | 2.2  | 1.2 volcanic   |
| 1912 | PrM-21-MW-T1 | PrM-MW | 0 | 47 | 42.0 | 30.0 | 16.0 volcanic  |
| 1913 | PrM-21-MW-T1 | PrM-MW | 0 | 48 | 3.0  | 2.0  | 1.8 volcanic   |
| 1914 | PrM-21-MW-T1 | PrM-MW | 0 | 49 | 4.2  | 3.8  | 1.6 volcanic   |
| 1915 | PrM-21-MW-T1 | PrM-MW | 0 | 50 | 4.2  | 3.7  | 2.2 volcanic   |
| 1916 | PrM-21-MW-T1 | PrM-MW | 0 | 51 | 10.0 | 6.5  | 3.8 volcanic   |
| 1917 | PrM-21-MW-T1 | PrM-MW | 0 | 52 | 2.1  | 1.7  | 1.2 volcanic   |
| 1918 | PrM-21-MW-T1 | PrM-MW | 0 | 53 | 15.0 | 13.5 | 11.0 carbonate |
| 1919 | PrM-21-MW-T1 | PrM-MW | 0 | 54 | 9.5  | 5.0  | 2.5 carbonate  |
| 1920 | PrM-21-MW-T1 | PrM-MW | 0 | 55 | 2.3  | 1.2  | 1.1 carbonate  |
| 1921 | PrM-21-MW-T1 | PrM-MW | 0 | 56 | 1.2  | 1.2  | 0.6 carbonate  |
| 1922 | PrM-21-MW-T1 | PrM-MW | 0 | 57 | 1.0  | 1.0  | 0.3 carbonate  |
| 1923 | PrM-21-MW-T1 | PrM-MW | 0 | 58 | 3.8  | 3.0  | 1.5 carbonate  |
| 1924 | PrM-21-MW-T1 | PrM-MW | 0 | 59 | 7.4  | 4.0  | 2.2 carbonate  |

|      |              |        |   |     |      |      |      |           |
|------|--------------|--------|---|-----|------|------|------|-----------|
| 1925 | PrM-21-MW-T1 | PrM-MW | 0 | 60  | 2.6  | 1.5  | 1.2  | carbonate |
| 1926 | PrM-21-MW-T1 | PrM-MW | 0 | 61  | 9.5  | 9.5  | 7.5  | carbonate |
| 1927 | PrM-21-MW-T1 | PrM-MW | 0 | 62  | 2.1  | 1.7  | 1.1  | carbonate |
| 1928 | PrM-21-MW-T1 | PrM-MW | 0 | 63  | 11.0 | 11.0 | 10.0 | carbonate |
| 1929 | PrM-21-MW-T1 | PrM-MW | 0 | 64  | 17.0 | 14.0 | 4.5  | carbonate |
| 1930 | PrM-21-MW-T1 | PrM-MW | 0 | 65  | 9.0  | 6.3  | 3.8  | carbonate |
| 1931 | PrM-21-MW-T1 | PrM-MW | 0 | 66  | 16.0 | 7.0  | 8.5  | carbonate |
| 1932 | PrM-21-MW-T1 | PrM-MW | 0 | 67  | 5.0  | 4.5  | 3.5  | carbonate |
| 1933 | PrM-21-MW-T1 | PrM-MW | 0 | 68  | 2.2  | 1.3  | 1.0  | carbonate |
| 1934 | PrM-21-MW-T1 | PrM-MW | 0 | 69  | 6.0  | 4.8  | 3.3  | carbonate |
| 1935 | PrM-21-MW-T1 | PrM-MW | 0 | 70  | 2.2  | 1.3  | 1.0  | carbonate |
| 1936 | PrM-21-MW-T1 | PrM-MW | 0 | 71  | 3.2  | 2.0  | 1.5  | carbonate |
| 1937 | PrM-21-MW-T1 | PrM-MW | 0 | 72  | 3.5  | 2.2  | 1.0  | carbonate |
| 1938 | PrM-21-MW-T1 | PrM-MW | 0 | 73  | 4.8  | 3.5  | 1.7  | carbonate |
| 1939 | PrM-21-MW-T2 | PrM-MW | 0 | 74  | 18.0 | 13.0 | 7.5  | granite   |
| 1940 | PrM-21-MW-T2 | PrM-MW | 0 | 75  | 36.0 | 19.0 | 12.0 | granite   |
| 1941 | PrM-21-MW-T2 | PrM-MW | 0 | 76  | 16.5 | 15.0 | 8.0  | granite   |
| 1942 | PrM-21-MW-T2 | PrM-MW | 0 | 77  | 2.8  | 2.7  | 2.2  | granite   |
| 1943 | PrM-21-MW-T2 | PrM-MW | 0 | 78  | 7.2  | 6.8  | 5.0  | granite   |
| 1944 | PrM-21-MW-T2 | PrM-MW | 0 | 79  | 2.0  | 1.7  | 1.1  | granite   |
| 1945 | PrM-21-MW-T2 | PrM-MW | 0 | 80  | 2.2  | 1.2  | 1.0  | granite   |
| 1946 | PrM-21-MW-T2 | PrM-MW | 0 | 81  | 3.5  | 3.0  | 2.2  | granite   |
| 1947 | PrM-21-MW-T2 | PrM-MW | 0 | 82  | 11.0 | 7.0  | 5.5  | granite   |
| 1948 | PrM-21-MW-T2 | PrM-MW | 0 | 83  | 27.5 | 24.0 | 9.0  | granite   |
| 1949 | PrM-21-MW-T2 | PrM-MW | 0 | 84  | 2.1  | 2.0  | 1.1  | granite   |
| 1950 | PrM-21-MW-T2 | PrM-MW | 0 | 85  | 26.0 | 20.5 | 21.0 | granite   |
| 1951 | PrM-21-MW-T2 | PrM-MW | 0 | 86  | 6.7  | 5.2  | 3.0  | granite   |
| 1952 | PrM-21-MW-T2 | PrM-MW | 0 | 87  | 11.5 | 8.5  | 5.0  | granite   |
| 1953 | PrM-21-MW-T2 | PrM-MW | 0 | 88  | 7.0  | 5.5  | 4.0  | granite   |
| 1954 | PrM-21-MW-T2 | PrM-MW | 0 | 89  | 6.5  | 4.2  | 3.6  | granite   |
| 1955 | PrM-21-MW-T2 | PrM-MW | 0 | 90  | 6.0  | 3.6  | 3.5  | granite   |
| 1956 | PrM-21-MW-T2 | PrM-MW | 0 | 91  | 3.0  | 2.5  | 1.1  | granite   |
| 1957 | PrM-21-MW-T2 | PrM-MW | 0 | 92  | 34.0 | 26.0 | 14.0 | granite   |
| 1958 | PrM-21-MW-T2 | PrM-MW | 0 | 93  | 11.5 | 10.0 | 5.0  | granite   |
| 1959 | PrM-21-MW-T2 | PrM-MW | 0 | 94  | 6.6  | 6.5  | 4.0  | granite   |
| 1960 | PrM-21-MW-T2 | PrM-MW | 0 | 95  | 6.5  | 4.0  | 4.0  | granite   |
| 1961 | PrM-21-MW-T2 | PrM-MW | 0 | 96  | 1.4  | 1.0  | 0.8  | granite   |
| 1962 | PrM-21-MW-T2 | PrM-MW | 0 | 97  | 24.5 | 12.5 | 12.5 | granite   |
| 1963 | PrM-21-MW-T2 | PrM-MW | 0 | 98  | 12.0 | 9.5  | 5.5  | granite   |
| 1964 | PrM-21-MW-T2 | PrM-MW | 0 | 99  | 4.0  | 3.6  | 2.5  | granite   |
| 1965 | PrM-21-MW-T2 | PrM-MW | 0 | 100 | 24.0 | 19.5 | 13.5 | volcanic  |
| 1966 | PrM-21-MW-T2 | PrM-MW | 0 | 101 | 9.5  | 5.3  | 3.0  | volcanic  |
| 1967 | PrM-21-MW-T2 | PrM-MW | 0 | 102 | 14.0 | 13.5 | 6.5  | volcanic  |
| 1968 | PrM-21-MW-T2 | PrM-MW | 0 | 103 | 17.5 | 11.0 | 5.0  | volcanic  |
| 1969 | PrM-21-MW-T2 | PrM-MW | 0 | 104 | 24.5 | 19.0 | 16.0 | volcanic  |
| 1970 | PrM-21-MW-T2 | PrM-MW | 0 | 105 | 12.0 | 9.0  | 7.0  | volcanic  |
| 1971 | PrM-21-MW-T2 | PrM-MW | 0 | 106 | 23.0 | 13.5 | 14.0 | volcanic  |

|      |              |        |   |     |      |      |      |           |
|------|--------------|--------|---|-----|------|------|------|-----------|
| 1972 | PrM-21-MW-T2 | PrM-MW | 0 | 107 | 23.5 | 13.0 | 10.0 | volcanic  |
| 1973 | PrM-21-MW-T2 | PrM-MW | 0 | 108 | 24.0 | 20.0 | 11.0 | volcanic  |
| 1974 | PrM-21-MW-T2 | PrM-MW | 0 | 109 | 25.5 | 16.0 | 8.0  | volcanic  |
| 1975 | PrM-21-MW-T2 | PrM-MW | 0 | 110 | 3.2  | 2.3  | 1.0  | volcanic  |
| 1976 | PrM-21-MW-T2 | PrM-MW | 0 | 111 | 13.5 | 8.5  | 8.5  | volcanic  |
| 1977 | PrM-21-MW-T2 | PrM-MW | 0 | 112 | 1.8  | 1.4  | 1.0  | volcanic  |
| 1978 | PrM-21-MW-T2 | PrM-MW | 0 | 113 | 6.8  | 6.2  | 3.0  | volcanic  |
| 1979 | PrM-21-MW-T2 | PrM-MW | 0 | 114 | 4.7  | 2.8  | 1.7  | volcanic  |
| 1980 | PrM-21-MW-T2 | PrM-MW | 0 | 115 | 6.0  | 5.0  | 3.5  | volcanic  |
| 1981 | PrM-21-MW-T2 | PrM-MW | 0 | 116 | 5.0  | 5.0  | 3.0  | volcanic  |
| 1982 | PrM-21-MW-T2 | PrM-MW | 0 | 117 | 11.0 | 7.2  | 5.0  | volcanic  |
| 1983 | PrM-21-MW-T2 | PrM-MW | 0 | 118 | 34.0 | 21.0 | 14.0 | volcanic  |
| 1984 | PrM-21-MW-T2 | PrM-MW | 0 | 119 | 36.0 | 26.5 | 21.0 | volcanic  |
| 1985 | PrM-21-MW-T2 | PrM-MW | 0 | 120 | 1.7  | 1.1  | 0.6  | volcanic  |
| 1986 | PrM-21-MW-T2 | PrM-MW | 0 | 121 | 3.3  | 2.5  | 1.7  | volcanic  |
| 1987 | PrM-21-MW-T2 | PrM-MW | 0 | 122 | 4.5  | 3.5  | 1.8  | volcanic  |
| 1988 | PrM-21-MW-T2 | PrM-MW | 0 | 123 | 1.8  | 1.6  | 0.6  | volcanic  |
| 1989 | PrM-21-MW-T2 | PrM-MW | 0 | 124 | 2.2  | 2.0  | 1.0  | volcanic  |
| 1990 | PrM-21-MW-T2 | PrM-MW | 0 | 125 | 1.7  | 1.0  | 0.6  | volcanic  |
| 1991 | PrM-21-MW-T2 | PrM-MW | 0 | 126 | 1.1  | 1.1  | 0.7  | volcanic  |
| 1992 | PrM-21-MW-T2 | PrM-MW | 0 | 127 | 5.9  | 3.5  | 2.0  | carbonate |
| 1993 | PrM-21-MW-T2 | PrM-MW | 0 | 128 | 5.0  | 4.2  | 2.2  | carbonate |
| 1994 | PrM-21-MW-T2 | PrM-MW | 0 | 129 | 1.8  | 1.2  | 0.7  | carbonate |
| 1995 | PrM-21-MW-T2 | PrM-MW | 0 | 130 | 1.4  | 1.1  | 0.5  | carbonate |
| 1996 | PrM-21-MW-T2 | PrM-MW | 0 | 131 | 2.2  | 1.8  | 1.0  | carbonate |
| 1997 | PrM-21-MW-T2 | PrM-MW | 0 | 132 | 2.6  | 2.1  | 1.7  | carbonate |
| 1998 | PrM-21-MW-T2 | PrM-MW | 0 | 133 | 2.4  | 2.3  | 0.8  | carbonate |
| 1999 | PrM-21-MW-T2 | PrM-MW | 0 | 134 | 29.0 | 17.0 | 11.0 | carbonate |
| 2000 | PrM-21-MW-T2 | PrM-MW | 0 | 135 | 3.5  | 3.3  | 2.2  | carbonate |
| 2001 | PrM-21-MW-T2 | PrM-MW | 0 | 136 | 11.2 | 9.3  | 5.5  | carbonate |
| 2002 | PrM-21-MW-T2 | PrM-MW | 0 | 137 | 2.7  | 1.1  | 0.7  | carbonate |
| 2003 | PrM-21-MW-T2 | PrM-MW | 0 | 138 | 4.0  | 3.6  | 3.0  | carbonate |
| 2004 | PrM-21-MW-T2 | PrM-MW | 0 | 139 | 41.0 | 30.5 | 16.0 | carbonate |
| 2005 | PrM-21-MW-T2 | PrM-MW | 0 | 140 | 1.3  | 1.0  | 0.6  | carbonate |
| 2006 | PrM-21-MW-T2 | PrM-MW | 0 | 141 | 4.6  | 4.0  | 1.5  | carbonate |
| 2007 | PrM-21-MW-T2 | PrM-MW | 0 | 142 | 12.5 | 6.0  | 3.5  | carbonate |
| 2008 | PrM-21-MW-T2 | PrM-MW | 0 | 143 | 1.3  | 1.1  | 1.0  | carbonate |
| 2009 | PrM-21-MW-T2 | PrM-MW | 0 | 144 | 3.5  | 2.2  | 1.4  | carbonate |
| 2010 | PrM-21-MW-T2 | PrM-MW | 0 | 145 | 2.2  | 1.5  | 0.6  | carbonate |
| 2011 | PrM-21-MW-T2 | PrM-MW | 0 | 146 | 5.7  | 4.5  | 2.2  | carbonate |
| 2012 | PrM-21-MW-T2 | PrM-MW | 0 | 147 | 16.5 | 14.5 | 13.0 | carbonate |
| 2013 | PrM-21-MW-T2 | PrM-MW | 0 | 148 | 5.5  | 4.5  | 3.8  | carbonate |
| 2014 | PrM-21-MW-T2 | PrM-MW | 0 | 149 | 1.1  | 1.0  | 0.5  | carbonate |
| 2015 | PrM-21-MW-T2 | PrM-MW | 0 | 150 | 3.0  | 2.6  | 1.2  | carbonate |
| 2016 | PrM-21-MW-T2 | PrM-MW | 0 | 151 | 3.2  | 2.7  | 1.7  | carbonate |
| 2017 | PrM-21-Q7-T2 | PrM-Q7 | 1 | 1   | 2.6  | 1.1  | 0.6  | granite   |
| 2018 | PrM-21-Q7-T2 | PrM-Q7 | 1 | 2   | 13.2 | 10.0 | 8.5  | granite   |

|      |              |        |   |    |      |      |               |
|------|--------------|--------|---|----|------|------|---------------|
| 2019 | PrM-21-Q7-T2 | PrM-Q7 | 1 | 3  | 9.5  | 8.5  | 4.0 granite   |
| 2020 | PrM-21-Q7-T2 | PrM-Q7 | 1 | 4  | 1.3  | 1.2  | 0.9 granite   |
| 2021 | PrM-21-Q7-T2 | PrM-Q7 | 1 | 5  | 6.0  | 4.4  | 2.2 granite   |
| 2022 | PrM-21-Q7-T2 | PrM-Q7 | 1 | 6  | 6.3  | 5.8  | 1.7 granite   |
| 2023 | PrM-21-Q7-T2 | PrM-Q7 | 1 | 7  | 7.0  | 6.0  | 4.0 granite   |
| 2024 | PrM-21-Q7-T2 | PrM-Q7 | 1 | 8  | 2.0  | 1.3  | 1.2 granite   |
| 2025 | PrM-21-Q7-T2 | PrM-Q7 | 1 | 9  | 14.0 | 10.0 | 7.5 granite   |
| 2026 | PrM-21-Q7-T2 | PrM-Q7 | 1 | 10 | 17.5 | 15.0 | 11.0 granite  |
| 2027 | PrM-21-Q7-T2 | PrM-Q7 | 1 | 11 | 17.0 | 16.0 | 11.0 granite  |
| 2028 | PrM-21-Q7-T2 | PrM-Q7 | 1 | 12 | 1.2  | 1.0  | 0.8 granite   |
| 2029 | PrM-21-Q7-T2 | PrM-Q7 | 1 | 13 | 3.4  | 2.6  | 2.0 granite   |
| 2030 | PrM-21-Q7-T2 | PrM-Q7 | 1 | 14 | 30.0 | 15.0 | 13.0 granite  |
| 2031 | PrM-21-Q7-T2 | PrM-Q7 | 1 | 15 | 1.2  | 1.0  | 0.6 granite   |
| 2032 | PrM-21-Q7-T2 | PrM-Q7 | 1 | 16 | 22.0 | 20.0 | 10.0 granite  |
| 2033 | PrM-21-Q7-T2 | PrM-Q7 | 1 | 17 | 19.0 | 17.0 | 13.0 granite  |
| 2034 | PrM-21-Q7-T2 | PrM-Q7 | 1 | 18 | 20.0 | 11.0 | 10.0 granite  |
| 2035 | PrM-21-Q7-T2 | PrM-Q7 | 1 | 19 | 21.5 | 18.0 | 12.0 granite  |
| 2036 | PrM-21-Q7-T2 | PrM-Q7 | 1 | 20 | 20.0 | 17.0 | 15.5 granite  |
| 2037 | PrM-21-Q7-T2 | PrM-Q7 | 1 | 21 | 5.5  | 3.3  | 2.0 granite   |
| 2038 | PrM-21-Q7-T2 | PrM-Q7 | 1 | 22 | 36.0 | 21.0 | 14.0 granite  |
| 2039 | PrM-21-Q7-T2 | PrM-Q7 | 1 | 23 | 20.0 | 9.0  | 8.5 granite   |
| 2040 | PrM-21-Q7-T2 | PrM-Q7 | 1 | 24 | 18.0 | 15.0 | 11.0 granite  |
| 2041 | PrM-21-Q7-T2 | PrM-Q7 | 1 | 25 | 13.5 | 12.5 | 5.0 granite   |
| 2042 | PrM-21-Q7-T2 | PrM-Q7 | 1 | 26 | 3.7  | 2.8  | 1.5 granite   |
| 2043 | PrM-21-Q7-T2 | PrM-Q7 | 1 | 27 | 10.0 | 10.0 | 8.0 granite   |
| 2044 | PrM-21-Q7-T2 | PrM-Q7 | 1 | 28 | 14.5 | 9.5  | 6.0 granite   |
| 2045 | PrM-21-Q7-T2 | PrM-Q7 | 1 | 29 | 10.5 | 8.5  | 5.5 granite   |
| 2046 | PrM-21-Q7-T2 | PrM-Q7 | 1 | 30 | 1.3  | 1.0  | 0.6 volcanic  |
| 2047 | PrM-21-Q7-T2 | PrM-Q7 | 1 | 31 | 2.8  | 2.5  | 2.0 volcanic  |
| 2048 | PrM-21-Q7-T2 | PrM-Q7 | 1 | 32 | 5.2  | 4.4  | 3.0 volcanic  |
| 2049 | PrM-21-Q7-T2 | PrM-Q7 | 1 | 33 | 1.5  | 1.5  | 0.8 volcanic  |
| 2050 | PrM-21-Q7-T2 | PrM-Q7 | 1 | 34 | 13.8 | 13.5 | 6.5 volcanic  |
| 2051 | PrM-21-Q7-T2 | PrM-Q7 | 1 | 35 | 7.0  | 6.2  | 3.0 volcanic  |
| 2052 | PrM-21-Q7-T2 | PrM-Q7 | 1 | 36 | 4.1  | 2.8  | 2.0 volcanic  |
| 2053 | PrM-21-Q7-T2 | PrM-Q7 | 1 | 37 | 13.5 | 9.5  | 7.0 volcanic  |
| 2054 | PrM-21-Q7-T2 | PrM-Q7 | 1 | 38 | 16.0 | 6.0  | 4.0 volcanic  |
| 2055 | PrM-21-Q7-T2 | PrM-Q7 | 1 | 39 | 15.0 | 13.0 | 11.0 volcanic |
| 2056 | PrM-21-Q7-T2 | PrM-Q7 | 1 | 40 | 20.0 | 18.0 | 9.0 volcanic  |
| 2057 | PrM-21-Q7-T2 | PrM-Q7 | 1 | 41 | 1.7  | 1.4  | 1.0 volcanic  |
| 2058 | PrM-21-Q7-T2 | PrM-Q7 | 1 | 42 | 5.4  | 3.5  | 1.5 volcanic  |
| 2059 | PrM-21-Q7-T2 | PrM-Q7 | 1 | 43 | 3.5  | 2.5  | 2.2 volcanic  |
| 2060 | PrM-21-Q7-T2 | PrM-Q7 | 1 | 44 | 2.5  | 1.2  | 1.1 volcanic  |
| 2061 | PrM-21-Q7-T2 | PrM-Q7 | 1 | 45 | 1.2  | 1.1  | 0.6 volcanic  |
| 2062 | PrM-21-Q7-T2 | PrM-Q7 | 1 | 46 | 5.5  | 5.0  | 2.5 volcanic  |
| 2063 | PrM-21-Q7-T2 | PrM-Q7 | 1 | 47 | 13.0 | 9.5  | 8.0 volcanic  |
| 2064 | PrM-21-Q7-T2 | PrM-Q7 | 1 | 48 | 13.0 | 11.0 | 10.0 volcanic |
| 2065 | PrM-21-Q7-T2 | PrM-Q7 | 1 | 49 | 26.5 | 22.0 | 16.0 volcanic |

|      |              |        |   |    |      |      |                |
|------|--------------|--------|---|----|------|------|----------------|
| 2066 | PrM-21-Q7-T2 | PrM-Q7 | 1 | 50 | 1.3  | 1.0  | 0.3 volcanic   |
| 2067 | PrM-21-Q7-T2 | PrM-Q7 | 1 | 51 | 1.8  | 1.5  | 0.8 volcanic   |
| 2068 | PrM-21-Q7-T2 | PrM-Q7 | 1 | 52 | 3.5  | 2.5  | 2.0 volcanic   |
| 2069 | PrM-21-Q7-T2 | PrM-Q7 | 1 | 53 | 10.2 | 8.0  | 6.5 volcanic   |
| 2070 | PrM-21-Q7-T2 | PrM-Q7 | 1 | 54 | 3.0  | 2.5  | 1.7 volcanic   |
| 2071 | PrM-21-Q7-T2 | PrM-Q7 | 1 | 55 | 9.0  | 5.0  | 5.0 volcanic   |
| 2072 | PrM-21-Q7-T2 | PrM-Q7 | 1 | 56 | 2.4  | 1.6  | 1.1 carbonate  |
| 2073 | PrM-21-Q7-T2 | PrM-Q7 | 1 | 57 | 2.3  | 2.0  | 1.5 carbonate  |
| 2074 | PrM-21-Q7-T2 | PrM-Q7 | 1 | 58 | 8.2  | 7.5  | 2.5 carbonate  |
| 2075 | PrM-21-Q7-T2 | PrM-Q7 | 1 | 59 | 3.2  | 2.2  | 1.5 carbonate  |
| 2076 | PrM-21-Q7-T2 | PrM-Q7 | 1 | 60 | 4.7  | 1.8  | 1.6 carbonate  |
| 2077 | PrM-21-Q7-T2 | PrM-Q7 | 1 | 61 | 3.2  | 1.2  | 0.6 carbonate  |
| 2078 | PrM-21-Q7-T2 | PrM-Q7 | 1 | 62 | 11.0 | 9.0  | 5.0 carbonate  |
| 2079 | PrM-21-Q7-T2 | PrM-Q7 | 1 | 63 | 13.0 | 12.0 | 10.5 carbonate |
| 2080 | PrM-21-Q7-T2 | PrM-Q7 | 1 | 64 | 12.5 | 9.5  | 6.0 carbonate  |
| 2081 | PrM-21-Q7-T2 | PrM-Q7 | 1 | 65 | 4.0  | 3.0  | 2.2 carbonate  |
| 2082 | PrM-21-Q7-T2 | PrM-Q7 | 1 | 66 | 2.3  | 1.8  | 1.5 carbonate  |
| 2083 | PrM-21-Q7-T2 | PrM-Q7 | 1 | 67 | 3.5  | 2.3  | 2.0 carbonate  |
| 2084 | PrM-21-Q7-T2 | PrM-Q7 | 1 | 68 | 3.5  | 2.7  | 2.0 carbonate  |
| 2085 | PrM-21-Q7-T3 | PrM-Q7 | 1 | 69 | 32.0 | 15.0 | 10.0 volcanic  |
| 2086 | PrM-21-Q7-T3 | PrM-Q7 | 1 | 70 | 8.0  | 4.8  | 3.5 volcanic   |
| 2087 | PrM-21-Q7-T3 | PrM-Q7 | 1 | 71 | 2.8  | 1.6  | 1.3 volcanic   |
| 2088 | PrM-21-Q7-T3 | PrM-Q7 | 1 | 72 | 4.2  | 3.3  | 2.0 volcanic   |
| 2089 | PrM-21-Q7-T3 | PrM-Q7 | 1 | 73 | 11.5 | 6.0  | 5.0 volcanic   |
| 2090 | PrM-21-Q7-T3 | PrM-Q7 | 1 | 74 | 8.5  | 4.2  | 4.0 volcanic   |
| 2091 | PrM-21-Q7-T3 | PrM-Q7 | 1 | 75 | 9.0  | 5.8  | 4.2 volcanic   |
| 2092 | PrM-21-Q7-T3 | PrM-Q7 | 1 | 76 | 6.3  | 3.3  | 3.0 volcanic   |
| 2093 | PrM-21-Q7-T3 | PrM-Q7 | 1 | 77 | 5.0  | 4.3  | 3.5 volcanic   |
| 2094 | PrM-21-Q7-T3 | PrM-Q7 | 1 | 78 | 5.5  | 3.5  | 3.5 volcanic   |
| 2095 | PrM-21-Q7-T3 | PrM-Q7 | 1 | 79 | 2.7  | 2.0  | 1.5 volcanic   |
| 2096 | PrM-21-Q7-T3 | PrM-Q7 | 1 | 80 | 2.3  | 2.0  | 1.1 volcanic   |
| 2097 | PrM-21-Q7-T3 | PrM-Q7 | 1 | 81 | 14.0 | 9.5  | 6.0 volcanic   |
| 2098 | PrM-21-Q7-T3 | PrM-Q7 | 1 | 82 | 3.3  | 2.7  | 1.6 volcanic   |
| 2099 | PrM-21-Q7-T3 | PrM-Q7 | 1 | 83 | 21.5 | 20.0 | 9.5 volcanic   |
| 2100 | PrM-21-Q7-T3 | PrM-Q7 | 1 | 84 | 2.2  | 1.7  | 1.1 volcanic   |
| 2101 | PrM-21-Q7-T3 | PrM-Q7 | 1 | 85 | 5.3  | 3.2  | 2.7 volcanic   |
| 2102 | PrM-21-Q7-T3 | PrM-Q7 | 1 | 86 | 5.0  | 4.2  | 2.2 volcanic   |
| 2103 | PrM-21-Q7-T3 | PrM-Q7 | 1 | 87 | 15.0 | 9.0  | 5.0 volcanic   |
| 2104 | PrM-21-Q7-T3 | PrM-Q7 | 1 | 88 | 17.5 | 14.5 | 11.0 volcanic  |
| 2105 | PrM-21-Q7-T3 | PrM-Q7 | 1 | 89 | 21.5 | 17.0 | 9.0 volcanic   |
| 2106 | PrM-21-Q7-T3 | PrM-Q7 | 1 | 90 | 25.5 | 25.0 | 10.0 granite   |
| 2107 | PrM-21-Q7-T3 | PrM-Q7 | 1 | 91 | 7.6  | 4.5  | 3.7 granite    |
| 2108 | PrM-21-Q7-T3 | PrM-Q7 | 1 | 92 | 22.0 | 12.5 | 12.0 granite   |
| 2109 | PrM-21-Q7-T3 | PrM-Q7 | 1 | 93 | 1.5  | 1.0  | 0.6 granite    |
| 2110 | PrM-21-Q7-T3 | PrM-Q7 | 1 | 94 | 2.7  | 2.2  | 1.2 granite    |
| 2111 | PrM-21-Q7-T3 | PrM-Q7 | 1 | 95 | 6.2  | 4.8  | 3.0 granite    |
| 2112 | PrM-21-Q7-T3 | PrM-Q7 | 1 | 96 | 14.0 | 8.5  | 6.5 granite    |

|      |              |        |    |     |      |      |                |
|------|--------------|--------|----|-----|------|------|----------------|
| 2113 | PrM-21-Q7-T3 | PrM-Q7 | 1  | 97  | 3.2  | 2.5  | 1.5 granite    |
| 2114 | PrM-21-Q7-T3 | PrM-Q7 | 1  | 98  | 20.0 | 19.0 | 6.5 granite    |
| 2115 | PrM-21-Q7-T3 | PrM-Q7 | 1  | 99  | 16.0 | 12.0 | 11.5 granite   |
| 2116 | PrM-21-Q7-T3 | PrM-Q7 | 1  | 100 | 28.0 | 19.5 | 12.0 granite   |
| 2117 | PrM-21-Q7-T3 | PrM-Q7 | 1  | 101 | 4.3  | 2.5  | 2.0 granite    |
| 2118 | PrM-21-Q7-T3 | PrM-Q7 | 1  | 102 | 8.5  | 6.5  | 2.5 granite    |
| 2119 | PrM-21-Q7-T3 | PrM-Q7 | 1  | 103 | 2.2  | 1.8  | 1.5 granite    |
| 2120 | PrM-21-Q7-T3 | PrM-Q7 | 1  | 104 | 1.8  | 1.2  | 1.2 granite    |
| 2121 | PrM-21-Q7-T3 | PrM-Q7 | 1  | 105 | 6.5  | 4.0  | 2.0 granite    |
| 2122 | PrM-21-Q7-T3 | PrM-Q7 | 1  | 106 | 3.1  | 2.2  | 1.7 granite    |
| 2123 | PrM-21-Q7-T3 | PrM-Q7 | 1  | 107 | 6.3  | 4.7  | 4.0 granite    |
| 2124 | PrM-21-Q7-T3 | PrM-Q7 | 1  | 108 | 4.3  | 2.7  | 1.0 granite    |
| 2125 | PrM-21-Q7-T3 | PrM-Q7 | 1  | 109 | 10.0 | 7.5  | 7.0 granite    |
| 2126 | PrM-21-Q7-T3 | PrM-Q7 | 1  | 110 | 2.3  | 1.5  | 1.5 granite    |
| 2127 | PrM-21-Q7-T3 | PrM-Q7 | 1  | 111 | 9.2  | 6.5  | 5.0 granite    |
| 2128 | PrM-21-Q7-T3 | PrM-Q7 | 1  | 112 | 2.1  | 1.9  | 1.0 carbonate  |
| 2129 | PrM-21-Q7-T3 | PrM-Q7 | 1  | 113 | 14.0 | 13.0 | 4.0 carbonate  |
| 2130 | PrM-21-Q7-T3 | PrM-Q7 | 1  | 114 | 4.0  | 2.7  | 1.8 carbonate  |
| 2131 | PrM-21-Q7-T3 | PrM-Q7 | 1  | 115 | 21.5 | 12.5 | 9.5 carbonate  |
| 2132 | PrM-21-Q7-T3 | PrM-Q7 | 1  | 116 | 24.0 | 20.5 | 15.0 carbonate |
| 2133 | PrM-21-Q7-T3 | PrM-Q7 | 1  | 117 | 11.0 | 7.5  | 4.5 carbonate  |
| 2134 | PrM-21-Q7-T3 | PrM-Q7 | 1  | 118 | 3.3  | 2.8  | 2.2 carbonate  |
| 2135 | PrM-21-Q7-T3 | PrM-Q7 | 1  | 119 | 1.6  | 1.1  | 0.9 carbonate  |
| 2136 | PrM-21-Q7-T3 | PrM-Q7 | 1  | 120 | 2.3  | 1.5  | 1.0 carbonate  |
| 2137 | PrM-21-Q7-T3 | PrM-Q7 | 1  | 121 | 7.3  | 5.2  | 2.5 carbonate  |
| 2138 | PrM-21-Q7-T3 | PrM-Q7 | 1  | 122 | 33.0 | 20.0 | 14.0 carbonate |
| 2139 | PrM-21-Q7-T3 | PrM-Q7 | 1  | 123 | 26.0 | 18.5 | 15.0 carbonate |
| 2140 | PrM-21-Q7-T3 | PrM-Q7 | 1  | 124 | 10.5 | 5.5  | 4.0 carbonate  |
| 2141 | PrM-21-Q7-T3 | PrM-Q7 | 1  | 125 | 8.8  | 7.0  | 5.8 carbonate  |
| 2142 | PrM-21-Q7-T3 | PrM-Q7 | 1  | 126 | 3.5  | 1.2  | 0.8 carbonate  |
| 2143 | PrM-21-Q7-T3 | PrM-Q7 | 1  | 127 | 14.5 | 14.0 | 8.0 carbonate  |
| 2144 | PrM-21-Q7-T3 | PrM-Q7 | 1  | 128 | 27.0 | 24.0 | 18.0 carbonate |
| 2145 | PrM-21-Q7-T3 | PrM-Q7 | 1  | 129 | 10.5 | 9.8  | 6.2 carbonate  |
| 2146 | PrM-21-Q7-T3 | PrM-Q7 | 1  | 130 | 2.2  | 2.1  | 1.8 carbonate  |
| 2147 | PrM-21-Q7-T3 | PrM-Q7 | 1  | 131 | 7.8  | 5.0  | 4.0 carbonate  |
| 2148 | PrM-21-Q7-T3 | PrM-Q7 | 1  | 132 | 6.0  | 4.2  | 3.0 carbonate  |
| 2149 | PrM-21-Q7-T3 | PrM-Q7 | 1  | 133 | 22.0 | 10.0 | 9.0 carbonate  |
| 2150 | PrM-21-Q5-T1 | PrM-Q5 | 10 | 1   | 9.0  | 6.3  | 3.0 granite    |
| 2151 | PrM-21-Q5-T1 | PrM-Q5 | 10 | 2   | 8.5  | 6.5  | 4.0 granite    |
| 2152 | PrM-21-Q5-T1 | PrM-Q5 | 10 | 3   | 3.5  | 2.9  | 1.7 granite    |
| 2153 | PrM-21-Q5-T1 | PrM-Q5 | 10 | 4   | 18.0 | 11.0 | 10.0 granite   |
| 2154 | PrM-21-Q5-T1 | PrM-Q5 | 10 | 5   | 6.3  | 5.5  | 4.0 granite    |
| 2155 | PrM-21-Q5-T1 | PrM-Q5 | 10 | 6   | 7.0  | 4.5  | 2.0 granite    |
| 2156 | PrM-21-Q5-T1 | PrM-Q5 | 10 | 7   | 8.3  | 6.7  | 4.0 granite    |
| 2157 | PrM-21-Q5-T1 | PrM-Q5 | 10 | 8   | 3.3  | 2.6  | 2.0 granite    |
| 2158 | PrM-21-Q5-T1 | PrM-Q5 | 10 | 9   | 1.6  | 1.1  | 0.8 granite    |
| 2159 | PrM-21-Q5-T1 | PrM-Q5 | 10 | 10  | 6.0  | 5.2  | 4.5 granite    |

|      |              |        |    |    |      |      |               |
|------|--------------|--------|----|----|------|------|---------------|
| 2160 | PrM-21-Q5-T1 | PrM-Q5 | 10 | 11 | 3.5  | 2.3  | 1.3 granite   |
| 2161 | PrM-21-Q5-T1 | PrM-Q5 | 10 | 12 | 3.8  | 2.8  | 0.6 granite   |
| 2162 | PrM-21-Q5-T1 | PrM-Q5 | 10 | 13 | 1.6  | 1.2  | 0.7 granite   |
| 2163 | PrM-21-Q5-T1 | PrM-Q5 | 10 | 14 | 3.5  | 1.8  | 0.8 granite   |
| 2164 | PrM-21-Q5-T1 | PrM-Q5 | 10 | 15 | 4.7  | 2.5  | 1.1 granite   |
| 2165 | PrM-21-Q5-T1 | PrM-Q5 | 10 | 16 | 2.3  | 1.8  | 1.1 granite   |
| 2166 | PrM-21-Q5-T1 | PrM-Q5 | 10 | 17 | 4.3  | 2.5  | 1.5 granite   |
| 2167 | PrM-21-Q5-T1 | PrM-Q5 | 10 | 18 | 3.7  | 2.5  | 1.5 granite   |
| 2168 | PrM-21-Q5-T1 | PrM-Q5 | 10 | 19 | 2.3  | 1.3  | 0.8 granite   |
| 2169 | PrM-21-Q5-T1 | PrM-Q5 | 10 | 20 | 6.8  | 4.2  | 3.5 granite   |
| 2170 | PrM-21-Q5-T1 | PrM-Q5 | 10 | 21 | 6.0  | 4.5  | 2.0 granite   |
| 2171 | PrM-21-Q5-T1 | PrM-Q5 | 10 | 22 | 2.2  | 1.2  | 0.7 granite   |
| 2172 | PrM-21-Q5-T1 | PrM-Q5 | 10 | 23 | 2.1  | 1.3  | 0.7 granite   |
| 2173 | PrM-21-Q5-T1 | PrM-Q5 | 10 | 24 | 1.3  | 1.0  | 0.6 granite   |
| 2174 | PrM-21-Q5-T1 | PrM-Q5 | 10 | 25 | 1.5  | 1.2  | 1.0 granite   |
| 2175 | PrM-21-Q5-T1 | PrM-Q5 | 10 | 26 | 1.3  | 1.0  | 0.7 granite   |
| 2176 | PrM-21-Q5-T1 | PrM-Q5 | 10 | 27 | 3.8  | 2.3  | 1.7 granite   |
| 2177 | PrM-21-Q5-T1 | PrM-Q5 | 10 | 28 | 2.3  | 2.0  | 0.8 granite   |
| 2178 | PrM-21-Q5-T1 | PrM-Q5 | 10 | 29 | 7.7  | 5.0  | 3.0 granite   |
| 2179 | PrM-21-Q5-T1 | PrM-Q5 | 10 | 30 | 2.5  | 2.0  | 0.9 granite   |
| 2180 | PrM-21-Q5-T1 | PrM-Q5 | 10 | 31 | 7.0  | 4.5  | 2.8 granite   |
| 2181 | PrM-21-Q5-T1 | PrM-Q5 | 10 | 32 | 3.3  | 2.4  | 2.0 granite   |
| 2182 | PrM-21-Q5-T1 | PrM-Q5 | 10 | 33 | 1.3  | 1.1  | 0.7 granite   |
| 2183 | PrM-21-Q5-T1 | PrM-Q5 | 10 | 34 | 3.8  | 1.8  | 1.8 granite   |
| 2184 | PrM-21-Q5-T1 | PrM-Q5 | 10 | 35 | 4.5  | 3.5  | 2.5 granite   |
| 2185 | PrM-21-Q5-T1 | PrM-Q5 | 10 | 36 | 18.0 | 16.0 | 6.5 granite   |
| 2186 | PrM-21-Q5-T1 | PrM-Q5 | 10 | 37 | 4.0  | 3.0  | 1.3 volcanic  |
| 2187 | PrM-21-Q5-T1 | PrM-Q5 | 10 | 38 | 5.3  | 4.3  | 1.2 volcanic  |
| 2188 | PrM-21-Q5-T1 | PrM-Q5 | 10 | 39 | 7.2  | 5.0  | 1.8 volcanic  |
| 2189 | PrM-21-Q5-T1 | PrM-Q5 | 10 | 40 | 7.2  | 5.5  | 4.5 volcanic  |
| 2190 | PrM-21-Q5-T1 | PrM-Q5 | 10 | 41 | 9.3  | 6.0  | 3.0 volcanic  |
| 2191 | PrM-21-Q5-T1 | PrM-Q5 | 10 | 42 | 20.5 | 16.0 | 11.5 volcanic |
| 2192 | PrM-21-Q5-T1 | PrM-Q5 | 10 | 43 | 2.7  | 2.0  | 1.2 volcanic  |
| 2193 | PrM-21-Q5-T1 | PrM-Q5 | 10 | 44 | 9.5  | 8.0  | 6.5 volcanic  |
| 2194 | PrM-21-Q5-T1 | PrM-Q5 | 10 | 45 | 13.5 | 10.5 | 4.0 volcanic  |
| 2195 | PrM-21-Q5-T1 | PrM-Q5 | 10 | 46 | 9.5  | 7.5  | 3.5 volcanic  |
| 2196 | PrM-21-Q5-T1 | PrM-Q5 | 10 | 47 | 4.0  | 3.2  | 2.5 volcanic  |
| 2197 | PrM-21-Q5-T1 | PrM-Q5 | 10 | 48 | 1.3  | 1.0  | 0.5 volcanic  |
| 2198 | PrM-21-Q5-T1 | PrM-Q5 | 10 | 49 | 2.6  | 1.7  | 1.0 volcanic  |
| 2199 | PrM-21-Q5-T1 | PrM-Q5 | 10 | 50 | 3.7  | 2.7  | 1.7 volcanic  |
| 2200 | PrM-21-Q5-T1 | PrM-Q5 | 10 | 51 | 12.0 | 8.0  | 4.8 volcanic  |
| 2201 | PrM-21-Q5-T1 | PrM-Q5 | 10 | 52 | 2.5  | 1.3  | 1.1 volcanic  |
| 2202 | PrM-21-Q5-T1 | PrM-Q5 | 10 | 53 | 3.2  | 3.2  | 1.1 volcanic  |
| 2203 | PrM-21-Q5-T1 | PrM-Q5 | 10 | 54 | 36.0 | 24.0 | 16.0 volcanic |
| 2204 | PrM-21-Q5-T1 | PrM-Q5 | 10 | 55 | 21.0 | 12.0 | 8.0 volcanic  |
| 2205 | PrM-21-Q5-T1 | PrM-Q5 | 10 | 56 | 9.0  | 4.5  | 4.0 volcanic  |
| 2206 | PrM-21-Q5-T1 | PrM-Q5 | 10 | 57 | 3.4  | 2.0  | 0.5 volcanic  |

|      |              |        |    |     |      |      |                |
|------|--------------|--------|----|-----|------|------|----------------|
| 2207 | PrM-21-Q5-T1 | PrM-Q5 | 10 | 58  | 2.0  | 1.7  | 0.5 volcanic   |
| 2208 | PrM-21-Q5-T1 | PrM-Q5 | 10 | 59  | 8.5  | 7.0  | 5.0 volcanic   |
| 2209 | PrM-21-Q5-T1 | PrM-Q5 | 10 | 60  | 5.3  | 3.7  | 3.5 volcanic   |
| 2210 | PrM-21-Q5-T1 | PrM-Q5 | 10 | 61  | 6.5  | 5.5  | 3.5 volcanic   |
| 2211 | PrM-21-Q5-T1 | PrM-Q5 | 10 | 62  | 2.0  | 1.6  | 1.0 volcanic   |
| 2212 | PrM-21-Q5-T1 | PrM-Q5 | 10 | 63  | 3.8  | 3.0  | 1.5 volcanic   |
| 2213 | PrM-21-Q5-T1 | PrM-Q5 | 10 | 64  | 4.0  | 3.7  | 3.2 volcanic   |
| 2214 | PrM-21-Q5-T1 | PrM-Q5 | 10 | 65  | 5.0  | 4.3  | 2.5 volcanic   |
| 2215 | PrM-21-Q5-T1 | PrM-Q5 | 10 | 66  | 3.4  | 2.4  | 0.8 volcanic   |
| 2216 | PrM-21-Q5-T1 | PrM-Q5 | 10 | 67  | 2.5  | 1.8  | 0.7 volcanic   |
| 2217 | PrM-21-Q5-T1 | PrM-Q5 | 10 | 68  | 16.0 | 7.0  | 4.0 volcanic   |
| 2218 | PrM-21-Q5-T1 | PrM-Q5 | 10 | 69  | 3.8  | 3.2  | 1.5 volcanic   |
| 2219 | PrM-21-Q5-T1 | PrM-Q5 | 10 | 70  | 1.7  | 1.0  | 0.4 volcanic   |
| 2220 | PrM-21-Q5-T1 | PrM-Q5 | 10 | 71  | 17.0 | 1.5  | 0.9 carbonate  |
| 2221 | PrM-21-Q5-T1 | PrM-Q5 | 10 | 72  | 7.0  | 4.3  | 3.3 carbonate  |
| 2222 | PrM-21-Q5-T1 | PrM-Q5 | 10 | 73  | 6.3  | 4.8  | 3.0 carbonate  |
| 2223 | PrM-21-Q5-T1 | PrM-Q5 | 10 | 74  | 5.3  | 3.5  | 2.0 carbonate  |
| 2224 | PrM-21-Q5-T1 | PrM-Q5 | 10 | 75  | 4.5  | 2.8  | 1.6 carbonate  |
| 2225 | PrM-21-Q5-T1 | PrM-Q5 | 10 | 76  | 4.5  | 2.9  | 2.7 carbonate  |
| 2226 | PrM-21-Q5-T1 | PrM-Q5 | 10 | 77  | 3.3  | 2.5  | 0.7 carbonate  |
| 2227 | PrM-21-Q5-T1 | PrM-Q5 | 10 | 78  | 4.2  | 3.0  | 2.0 carbonate  |
| 2228 | PrM-21-Q5-T1 | PrM-Q5 | 10 | 79  | 4.1  | 2.5  | 0.8 carbonate  |
| 2229 | PrM-21-Q5-T1 | PrM-Q5 | 10 | 80  | 3.0  | 1.6  | 1.2 carbonate  |
| 2230 | PrM-21-Q5-T1 | PrM-Q5 | 10 | 81  | 4.3  | 4.0  | 2.0 carbonate  |
| 2231 | PrM-21-Q5-T1 | PrM-Q5 | 10 | 82  | 1.8  | 1.2  | 0.6 carbonate  |
| 2232 | PrM-21-Q5-T1 | PrM-Q5 | 10 | 83  | 35.0 | 23.0 | 23.0 carbonate |
| 2233 | PrM-21-Q5-T1 | PrM-Q5 | 10 | 84  | 2.7  | 1.7  | 1.0 carbonate  |
| 2234 | PrM-21-Q5-T1 | PrM-Q5 | 10 | 85  | 3.8  | 3.0  | 2.5 carbonate  |
| 2235 | PrM-21-Q5-T1 | PrM-Q5 | 10 | 86  | 6.3  | 3.5  | 2.7 carbonate  |
| 2236 | PrM-21-Q5-T1 | PrM-Q5 | 10 | 87  | 12.5 | 6.5  | 4.5 carbonate  |
| 2237 | PrM-21-Q5-T1 | PrM-Q5 | 10 | 88  | 15.7 | 15.0 | 10.0 carbonate |
| 2238 | PrM-21-Q5-T1 | PrM-Q5 | 10 | 89  | 11.5 | 7.0  | 4.2 carbonate  |
| 2239 | PrM-21-Q5-T1 | PrM-Q5 | 10 | 90  | 1.9  | 1.0  | 0.8 carbonate  |
| 2240 | PrM-21-Q5-T1 | PrM-Q5 | 10 | 91  | 4.0  | 3.3  | 2.5 carbonate  |
| 2241 | PrM-21-Q5-T1 | PrM-Q5 | 10 | 92  | 6.8  | 4.0  | 3.0 carbonate  |
| 2242 | PrM-21-Q5-T1 | PrM-Q5 | 10 | 93  | 2.5  | 1.5  | 0.7 carbonate  |
| 2243 | PrM-21-Q5-T1 | PrM-Q5 | 10 | 94  | 4.8  | 4.2  | 3.0 carbonate  |
| 2244 | PrM-21-Q5-T1 | PrM-Q5 | 10 | 95  | 11.5 | 10.0 | 3.5 carbonate  |
| 2245 | PrM-21-Q5-T1 | PrM-Q5 | 10 | 96  | 1.8  | 1.0  | 0.7 carbonate  |
| 2246 | PrM-21-Q5-T1 | PrM-Q5 | 10 | 97  | 3.2  | 1.8  | 1.0 carbonate  |
| 2247 | PrM-21-Q5-T1 | PrM-Q5 | 10 | 98  | 11.2 | 8.5  | 7.0 carbonate  |
| 2248 | PrM-21-Q5-T1 | PrM-Q5 | 10 | 99  | 16.0 | 7.5  | 6.0 carbonate  |
| 2249 | PrM-21-Q5-T1 | PrM-Q5 | 10 | 100 | 9.0  | 8.0  | 4.5 carbonate  |
| 2250 | PrM-21-Q5-T2 | PrM-Q5 | 10 | 101 | 5.2  | 3.8  | 2.8 granite    |
| 2251 | PrM-21-Q5-T2 | PrM-Q5 | 10 | 102 | 19.5 | 10.0 | 4.5 granite    |
| 2252 | PrM-21-Q5-T2 | PrM-Q5 | 10 | 103 | 2.8  | 2.2  | 1.1 granite    |
| 2253 | PrM-21-Q5-T2 | PrM-Q5 | 10 | 104 | 2.8  | 1.6  | 0.5 granite    |

|      |              |        |    |     |      |      |                |
|------|--------------|--------|----|-----|------|------|----------------|
| 2254 | PrM-21-Q5-T2 | PrM-Q5 | 10 | 105 | 9.0  | 5.8  | 2.2 granite    |
| 2255 | PrM-21-Q5-T2 | PrM-Q5 | 10 | 106 | 1.7  | 1.1  | 0.7 granite    |
| 2256 | PrM-21-Q5-T2 | PrM-Q5 | 10 | 107 | 11.0 | 6.5  | 5.5 granite    |
| 2257 | PrM-21-Q5-T2 | PrM-Q5 | 10 | 108 | 2.3  | 1.0  | 0.5 granite    |
| 2258 | PrM-21-Q5-T2 | PrM-Q5 | 10 | 109 | 9.5  | 8.5  | 5.0 granite    |
| 2259 | PrM-21-Q5-T2 | PrM-Q5 | 10 | 110 | 1.5  | 1.2  | 0.7 granite    |
| 2260 | PrM-21-Q5-T2 | PrM-Q5 | 10 | 111 | 8.5  | 6.5  | 3.5 granite    |
| 2261 | PrM-21-Q5-T2 | PrM-Q5 | 10 | 112 | 7.0  | 2.5  | 0.8 granite    |
| 2262 | PrM-21-Q5-T2 | PrM-Q5 | 10 | 113 | 1.1  | 1.0  | 0.3 granite    |
| 2263 | PrM-21-Q5-T2 | PrM-Q5 | 10 | 114 | 2.3  | 1.9  | 0.5 granite    |
| 2264 | PrM-21-Q5-T2 | PrM-Q5 | 10 | 115 | 5.8  | 3.8  | 2.5 granite    |
| 2265 | PrM-21-Q5-T2 | PrM-Q5 | 10 | 116 | 2.0  | 1.8  | 1.1 granite    |
| 2266 | PrM-21-Q5-T2 | PrM-Q5 | 10 | 117 | 4.1  | 4.0  | 2.8 granite    |
| 2267 | PrM-21-Q5-T2 | PrM-Q5 | 10 | 118 | 2.0  | 1.7  | 0.9 granite    |
| 2268 | PrM-21-Q5-T2 | PrM-Q5 | 10 | 119 | 2.4  | 1.0  | 0.9 volcanic   |
| 2269 | PrM-21-Q5-T2 | PrM-Q5 | 10 | 120 | 1.5  | 1.2  | 0.9 volcanic   |
| 2270 | PrM-21-Q5-T2 | PrM-Q5 | 10 | 121 | 10.0 | 10.0 | 8.5 volcanic   |
| 2271 | PrM-21-Q5-T2 | PrM-Q5 | 10 | 122 | 12.5 | 8.5  | 7.5 volcanic   |
| 2272 | PrM-21-Q5-T2 | PrM-Q5 | 10 | 123 | 5.5  | 4.5  | 3.8 volcanic   |
| 2273 | PrM-21-Q5-T2 | PrM-Q5 | 10 | 124 | 12.0 | 9.0  | 9.5 volcanic   |
| 2274 | PrM-21-Q5-T2 | PrM-Q5 | 10 | 125 | 3.0  | 1.4  | 0.7 volcanic   |
| 2275 | PrM-21-Q5-T2 | PrM-Q5 | 10 | 126 | 6.0  | 4.0  | 2.0 volcanic   |
| 2276 | PrM-21-Q5-T2 | PrM-Q5 | 10 | 127 | 12.5 | 8.0  | 4.5 volcanic   |
| 2277 | PrM-21-Q5-T2 | PrM-Q5 | 10 | 128 | 14.0 | 8.5  | 2.5 volcanic   |
| 2278 | PrM-21-Q5-T2 | PrM-Q5 | 10 | 129 | 22.0 | 20.0 | 14.0 volcanic  |
| 2279 | PrM-21-Q5-T2 | PrM-Q5 | 10 | 130 | 3.3  | 2.7  | 1.7 volcanic   |
| 2280 | PrM-21-Q5-T2 | PrM-Q5 | 10 | 131 | 2.0  | 1.1  | 1.0 volcanic   |
| 2281 | PrM-21-Q5-T2 | PrM-Q5 | 10 | 132 | 10.0 | 8.0  | 3.5 volcanic   |
| 2282 | PrM-21-Q5-T2 | PrM-Q5 | 10 | 133 | 2.3  | 1.1  | 0.7 volcanic   |
| 2283 | PrM-21-Q5-T2 | PrM-Q5 | 10 | 134 | 14.5 | 13.0 | 7.0 volcanic   |
| 2284 | PrM-21-Q5-T2 | PrM-Q5 | 10 | 135 | 25.5 | 12.5 | 8.5 volcanic   |
| 2285 | PrM-21-Q5-T2 | PrM-Q5 | 10 | 136 | 3.2  | 2.2  | 1.3 volcanic   |
| 2286 | PrM-21-Q5-T2 | PrM-Q5 | 10 | 137 | 3.8  | 1.5  | 1.0 volcanic   |
| 2287 | PrM-21-Q5-T2 | PrM-Q5 | 10 | 138 | 2.0  | 1.6  | 1.2 volcanic   |
| 2288 | PrM-21-Q5-T2 | PrM-Q5 | 10 | 139 | 1.6  | 1.3  | 0.7 carbonate  |
| 2289 | PrM-21-Q5-T2 | PrM-Q5 | 10 | 140 | 1.7  | 1.1  | 0.9 carbonate  |
| 2290 | PrM-21-Q5-T2 | PrM-Q5 | 10 | 141 | 15.5 | 9.0  | 7.8 carbonate  |
| 2291 | PrM-21-Q5-T2 | PrM-Q5 | 10 | 142 | 4.8  | 3.0  | 1.6 carbonate  |
| 2292 | PrM-21-Q5-T2 | PrM-Q5 | 10 | 143 | 13.0 | 9.5  | 6.0 carbonate  |
| 2293 | PrM-21-Q5-T2 | PrM-Q5 | 10 | 144 | 15.0 | 12.5 | 8.0 carbonate  |
| 2294 | PrM-21-Q5-T2 | PrM-Q5 | 10 | 145 | 3.0  | 2.2  | 1.8 carbonate  |
| 2295 | PrM-21-Q5-T2 | PrM-Q5 | 10 | 146 | 2.3  | 1.5  | 1.1 carbonate  |
| 2296 | PrM-21-Q5-T2 | PrM-Q5 | 10 | 147 | 21.0 | 20.0 | 12.0 carbonate |
| 2297 | PrM-21-Q5-T2 | PrM-Q5 | 10 | 148 | 1.5  | 1.4  | 0.8 carbonate  |
| 2298 | PrM-21-Q5-T2 | PrM-Q5 | 10 | 149 | 10.0 | 8.5  | 5.5 carbonate  |
| 2299 | PrM-21-Q5-T2 | PrM-Q5 | 10 | 150 | 9.5  | 7.5  | 7.5 carbonate  |
| 2300 | PrM-21-Q5-T2 | PrM-Q5 | 10 | 151 | 2.3  | 1.3  | 0.7 carbonate  |

|      |              |        |    |     |      |      |               |
|------|--------------|--------|----|-----|------|------|---------------|
| 2301 | PrM-21-Q5-T2 | PrM-Q5 | 10 | 152 | 3.8  | 1.8  | 1.5 carbonate |
| 2302 | PrM-21-Q5-T2 | PrM-Q5 | 10 | 153 | 2.7  | 1.7  | 0.6 carbonate |
| 2303 | PrM-21-Q5-T2 | PrM-Q5 | 10 | 154 | 2.5  | 1.8  | 1.0 carbonate |
| 2304 | PrM-21-Q4-T1 | PrM-Q4 | 30 | 1   | 2.2  | 1.4  | 1.0 granite   |
| 2305 | PrM-21-Q4-T1 | PrM-Q4 | 30 | 2   | 1.8  | 1.1  | 0.7 granite   |
| 2306 | PrM-21-Q4-T1 | PrM-Q4 | 30 | 3   | 4.8  | 3.5  | 2.0 granite   |
| 2307 | PrM-21-Q4-T1 | PrM-Q4 | 30 | 4   | 1.9  | 1.7  | 0.9 granite   |
| 2308 | PrM-21-Q4-T1 | PrM-Q4 | 30 | 5   | 3.0  | 2.5  | 1.8 granite   |
| 2309 | PrM-21-Q4-T1 | PrM-Q4 | 30 | 6   | 2.3  | 1.9  | 0.9 granite   |
| 2310 | PrM-21-Q4-T1 | PrM-Q4 | 30 | 7   | 3.2  | 2.6  | 1.2 granite   |
| 2311 | PrM-21-Q4-T1 | PrM-Q4 | 30 | 8   | 3.8  | 2.0  | 1.3 granite   |
| 2312 | PrM-21-Q4-T1 | PrM-Q4 | 30 | 9   | 1.8  | 1.7  | 0.7 granite   |
| 2313 | PrM-21-Q4-T1 | PrM-Q4 | 30 | 10  | 16.0 | 8.0  | 6.5 granite   |
| 2314 | PrM-21-Q4-T1 | PrM-Q4 | 30 | 11  | 4.5  | 3.6  | 2.5 granite   |
| 2315 | PrM-21-Q4-T1 | PrM-Q4 | 30 | 12  | 4.2  | 3.5  | 1.6 granite   |
| 2316 | PrM-21-Q4-T1 | PrM-Q4 | 30 | 13  | 2.1  | 1.6  | 0.3 granite   |
| 2317 | PrM-21-Q4-T1 | PrM-Q4 | 30 | 14  | 9.8  | 7.0  | 6.0 granite   |
| 2318 | PrM-21-Q4-T1 | PrM-Q4 | 30 | 15  | 1.8  | 1.1  | 0.7 granite   |
| 2319 | PrM-21-Q4-T1 | PrM-Q4 | 30 | 16  | 1.3  | 1.2  | 0.5 granite   |
| 2320 | PrM-21-Q4-T1 | PrM-Q4 | 30 | 17  | 3.3  | 2.5  | 1.2 granite   |
| 2321 | PrM-21-Q4-T1 | PrM-Q4 | 30 | 18  | 8.2  | 5.0  | 3.2 granite   |
| 2322 | PrM-21-Q4-T1 | PrM-Q4 | 30 | 19  | 2.0  | 1.4  | 0.8 granite   |
| 2323 | PrM-21-Q4-T1 | PrM-Q4 | 30 | 20  | 2.7  | 1.8  | 1.2 volcanic  |
| 2324 | PrM-21-Q4-T1 | PrM-Q4 | 30 | 21  | 8.0  | 7.8  | 3.5 volcanic  |
| 2325 | PrM-21-Q4-T1 | PrM-Q4 | 30 | 22  | 2.1  | 1.6  | 0.5 volcanic  |
| 2326 | PrM-21-Q4-T1 | PrM-Q4 | 30 | 23  | 8.5  | 4.0  | 2.0 volcanic  |
| 2327 | PrM-21-Q4-T1 | PrM-Q4 | 30 | 24  | 11.5 | 8.0  | 6.5 volcanic  |
| 2328 | PrM-21-Q4-T1 | PrM-Q4 | 30 | 25  | 1.7  | 1.6  | 0.6 volcanic  |
| 2329 | PrM-21-Q4-T1 | PrM-Q4 | 30 | 26  | 33.0 | 31.0 | 16.5 volcanic |
| 2330 | PrM-21-Q4-T1 | PrM-Q4 | 30 | 27  | 2.8  | 2.0  | 1.2 volcanic  |
| 2331 | PrM-21-Q4-T1 | PrM-Q4 | 30 | 28  | 2.5  | 1.6  | 1.5 volcanic  |
| 2332 | PrM-21-Q4-T1 | PrM-Q4 | 30 | 29  | 4.5  | 2.7  | 2.3 volcanic  |
| 2333 | PrM-21-Q4-T1 | PrM-Q4 | 30 | 30  | 2.0  | 1.4  | 1.1 volcanic  |
| 2334 | PrM-21-Q4-T1 | PrM-Q4 | 30 | 31  | 29.5 | 24.0 | 22.0 volcanic |
| 2335 | PrM-21-Q4-T1 | PrM-Q4 | 30 | 32  | 2.2  | 1.5  | 1.0 volcanic  |
| 2336 | PrM-21-Q4-T1 | PrM-Q4 | 30 | 33  | 3.0  | 1.8  | 1.2 volcanic  |
| 2337 | PrM-21-Q4-T1 | PrM-Q4 | 30 | 34  | 3.3  | 1.8  | 1.5 volcanic  |
| 2338 | PrM-21-Q4-T1 | PrM-Q4 | 30 | 35  | 3.0  | 2.1  | 0.9 volcanic  |
| 2339 | PrM-21-Q4-T1 | PrM-Q4 | 30 | 36  | 2.6  | 1.5  | 1.0 volcanic  |
| 2340 | PrM-21-Q4-T1 | PrM-Q4 | 30 | 37  | 3.4  | 2.0  | 1.5 volcanic  |
| 2341 | PrM-21-Q4-T1 | PrM-Q4 | 30 | 38  | 20.5 | 16.5 | 4.0 volcanic  |
| 2342 | PrM-21-Q4-T1 | PrM-Q4 | 30 | 39  | 3.7  | 3.2  | 1.6 volcanic  |
| 2343 | PrM-21-Q4-T1 | PrM-Q4 | 30 | 40  | 1.7  | 1.2  | 0.5 volcanic  |
| 2344 | PrM-21-Q4-T1 | PrM-Q4 | 30 | 41  | 4.3  | 3.2  | 2.5 carbonate |
| 2345 | PrM-21-Q4-T1 | PrM-Q4 | 30 | 42  | 9.2  | 7.0  | 2.0 carbonate |
| 2346 | PrM-21-Q4-T1 | PrM-Q4 | 30 | 43  | 9.2  | 5.8  | 3.5 carbonate |
| 2347 | PrM-21-Q4-T1 | PrM-Q4 | 30 | 44  | 7.0  | 5.5  | 3.2 carbonate |

|      |              |        |    |    |      |     |               |
|------|--------------|--------|----|----|------|-----|---------------|
| 2348 | PrM-21-Q4-T1 | PrM-Q4 | 30 | 45 | 1.7  | 1.2 | 1.0 carbonate |
| 2349 | PrM-21-Q4-T1 | PrM-Q4 | 30 | 46 | 2.5  | 2.2 | 2.0 carbonate |
| 2350 | PrM-21-Q4-T1 | PrM-Q4 | 30 | 47 | 4.2  | 4.0 | 1.8 carbonate |
| 2351 | PrM-21-Q4-T1 | PrM-Q4 | 30 | 48 | 3.2  | 2.3 | 1.8 carbonate |
| 2352 | PrM-21-Q4-T1 | PrM-Q4 | 30 | 49 | 1.8  | 1.3 | 1.2 carbonate |
| 2353 | PrM-21-Q4-T1 | PrM-Q4 | 30 | 50 | 1.6  | 1.5 | 1.0 carbonate |
| 2354 | PrM-21-Q4-T1 | PrM-Q4 | 30 | 51 | 1.9  | 1.2 | 0.4 carbonate |
| 2355 | PrM-21-Q4-T1 | PrM-Q4 | 30 | 52 | 1.6  | 1.2 | 0.6 carbonate |
| 2356 | PrM-21-Q4-T1 | PrM-Q4 | 30 | 53 | 3.8  | 2.5 | 0.3 carbonate |
| 2357 | PrM-21-Q4-T1 | PrM-Q4 | 30 | 54 | 7.0  | 4.5 | 2.0 carbonate |
| 2358 | PrM-21-Q4-T1 | PrM-Q4 | 30 | 55 | 5.0  | 3.0 | 1.5 carbonate |
| 2359 | PrM-21-Q4-T1 | PrM-Q4 | 30 | 56 | 1.5  | 1.2 | 0.8 carbonate |
| 2360 | PrM-21-Q4-T1 | PrM-Q4 | 30 | 57 | 2.0  | 1.1 | 0.9 carbonate |
| 2361 | PrM-21-Q4-T2 | PrM-Q4 | 30 | 58 | 10.5 | 7.5 | 4.5 granite   |
| 2362 | PrM-21-Q4-T2 | PrM-Q4 | 30 | 59 | 2.2  | 1.7 | 1.2 granite   |
| 2363 | PrM-21-Q4-T2 | PrM-Q4 | 30 | 60 | 9.0  | 4.2 | 2.5 granite   |
| 2364 | PrM-21-Q4-T2 | PrM-Q4 | 30 | 61 | 1.7  | 1.1 | 0.5 granite   |
| 2365 | PrM-21-Q4-T2 | PrM-Q4 | 30 | 62 | 5.7  | 5.2 | 1.5 granite   |
| 2366 | PrM-21-Q4-T2 | PrM-Q4 | 30 | 63 | 3.0  | 1.5 | 1.1 granite   |
| 2367 | PrM-21-Q4-T2 | PrM-Q4 | 30 | 64 | 3.2  | 1.8 | 1.5 granite   |
| 2368 | PrM-21-Q4-T2 | PrM-Q4 | 30 | 65 | 2.5  | 1.5 | 1.2 granite   |
| 2369 | PrM-21-Q4-T2 | PrM-Q4 | 30 | 66 | 5.2  | 3.0 | 2.0 granite   |
| 2370 | PrM-21-Q4-T2 | PrM-Q4 | 30 | 67 | 1.8  | 1.5 | 0.9 granite   |
| 2371 | PrM-21-Q4-T2 | PrM-Q4 | 30 | 68 | 2.2  | 1.5 | 1.2 granite   |
| 2372 | PrM-21-Q4-T2 | PrM-Q4 | 30 | 69 | 14.0 | 8.0 | 4.0 granite   |
| 2373 | PrM-21-Q4-T2 | PrM-Q4 | 30 | 70 | 1.9  | 1.2 | 0.8 granite   |
| 2374 | PrM-21-Q4-T2 | PrM-Q4 | 30 | 71 | 2.2  | 1.4 | 0.6 granite   |
| 2375 | PrM-21-Q4-T2 | PrM-Q4 | 30 | 72 | 2.3  | 1.2 | 1.0 volcanic  |
| 2376 | PrM-21-Q4-T2 | PrM-Q4 | 30 | 73 | 4.3  | 2.3 | 1.8 volcanic  |
| 2377 | PrM-21-Q4-T2 | PrM-Q4 | 30 | 74 | 2.9  | 1.6 | 1.1 volcanic  |
| 2378 | PrM-21-Q4-T2 | PrM-Q4 | 30 | 75 | 6.0  | 3.5 | 1.5 volcanic  |
| 2379 | PrM-21-Q4-T2 | PrM-Q4 | 30 | 76 | 3.8  | 2.0 | 0.8 volcanic  |
| 2380 | PrM-21-Q4-T2 | PrM-Q4 | 30 | 77 | 1.5  | 1.4 | 0.4 volcanic  |
| 2381 | PrM-21-Q4-T2 | PrM-Q4 | 30 | 78 | 6.2  | 4.2 | 3.0 volcanic  |
| 2382 | PrM-21-Q4-T2 | PrM-Q4 | 30 | 79 | 1.7  | 1.0 | 0.6 volcanic  |
| 2383 | PrM-21-Q4-T2 | PrM-Q4 | 30 | 80 | 2.3  | 1.8 | 0.7 volcanic  |
| 2384 | PrM-21-Q4-T2 | PrM-Q4 | 30 | 81 | 3.2  | 2.0 | 1.5 volcanic  |
| 2385 | PrM-21-Q4-T2 | PrM-Q4 | 30 | 82 | 3.2  | 2.5 | 1.0 volcanic  |
| 2386 | PrM-21-Q4-T2 | PrM-Q4 | 30 | 83 | 2.0  | 1.6 | 1.0 volcanic  |
| 2387 | PrM-21-Q4-T2 | PrM-Q4 | 30 | 84 | 1.5  | 1.1 | 0.5 volcanic  |
| 2388 | PrM-21-Q4-T2 | PrM-Q4 | 30 | 85 | 2.5  | 1.6 | 1.0 volcanic  |
| 2389 | PrM-21-Q4-T2 | PrM-Q4 | 30 | 86 | 1.8  | 1.2 | 0.7 carbonate |
| 2390 | PrM-21-Q4-T2 | PrM-Q4 | 30 | 87 | 1.3  | 1.0 | 0.5 carbonate |
| 2391 | PrM-21-Q4-T2 | PrM-Q4 | 30 | 88 | 2.2  | 1.5 | 0.9 carbonate |
| 2392 | PrM-21-Q4-T2 | PrM-Q4 | 30 | 89 | 1.6  | 1.1 | 1.0 carbonate |
| 2393 | PrM-21-Q4-T2 | PrM-Q4 | 30 | 90 | 3.7  | 2.8 | 2.2 carbonate |
| 2394 | PrM-21-Q4-T2 | PrM-Q4 | 30 | 91 | 3.0  | 1.7 | 0.8 carbonate |

|      |              |        |    |     |      |      |               |
|------|--------------|--------|----|-----|------|------|---------------|
| 2395 | PrM-21-Q4-T2 | PrM-Q4 | 30 | 92  | 4.0  | 2.8  | 2.2 carbonate |
| 2396 | PrM-21-Q4-T2 | PrM-Q4 | 30 | 93  | 1.3  | 1.3  | 0.6 carbonate |
| 2397 | PrM-21-Q4-T2 | PrM-Q4 | 30 | 94  | 1.9  | 1.2  | 1.0 carbonate |
| 2398 | PrM-21-Q4-T2 | PrM-Q4 | 30 | 95  | 2.0  | 1.5  | 0.9 carbonate |
| 2399 | PrM-21-Q4-T2 | PrM-Q4 | 30 | 96  | 1.7  | 1.4  | 0.5 carbonate |
| 2400 | PrM-21-Q4-T2 | PrM-Q4 | 30 | 97  | 1.5  | 1.4  | 0.7 carbonate |
| 2401 | PrM-21-Q4-T2 | PrM-Q4 | 30 | 98  | 1.6  | 1.3  | 0.7 carbonate |
| 2402 | PrM-21-Q4-T2 | PrM-Q4 | 30 | 99  | 2.3  | 1.6  | 0.7 carbonate |
| 2403 | PrM-21-Q4-T3 | PrM-Q4 | 30 | 100 | 2.5  | 2.1  | 1.3 granite   |
| 2404 | PrM-21-Q4-T3 | PrM-Q4 | 30 | 101 | 8.0  | 4.8  | 3.8 granite   |
| 2405 | PrM-21-Q4-T3 | PrM-Q4 | 30 | 102 | 4.5  | 4.0  | 2.2 granite   |
| 2406 | PrM-21-Q4-T3 | PrM-Q4 | 30 | 103 | 2.4  | 1.6  | 1.4 granite   |
| 2407 | PrM-21-Q4-T3 | PrM-Q4 | 30 | 104 | 4.2  | 3.3  | 3.0 granite   |
| 2408 | PrM-21-Q4-T3 | PrM-Q4 | 30 | 105 | 3.1  | 1.5  | 0.9 granite   |
| 2409 | PrM-21-Q4-T3 | PrM-Q4 | 30 | 106 | 1.9  | 1.3  | 1.1 granite   |
| 2410 | PrM-21-Q4-T3 | PrM-Q4 | 30 | 107 | 2.2  | 1.2  | 0.4 granite   |
| 2411 | PrM-21-Q4-T3 | PrM-Q4 | 30 | 108 | 2.3  | 1.8  | 1.2 granite   |
| 2412 | PrM-21-Q4-T3 | PrM-Q4 | 30 | 109 | 2.0  | 1.2  | 0.6 granite   |
| 2413 | PrM-21-Q4-T3 | PrM-Q4 | 30 | 110 | 7.5  | 4.5  | 4.3 granite   |
| 2414 | PrM-21-Q4-T3 | PrM-Q4 | 30 | 111 | 5.8  | 3.5  | 1.6 granite   |
| 2415 | PrM-21-Q4-T3 | PrM-Q4 | 30 | 112 | 2.3  | 1.6  | 1.2 granite   |
| 2416 | PrM-21-Q4-T3 | PrM-Q4 | 30 | 113 | 2.6  | 1.5  | 1.0 granite   |
| 2417 | PrM-21-Q4-T3 | PrM-Q4 | 30 | 114 | 1.7  | 1.1  | 0.6 granite   |
| 2418 | PrM-21-Q4-T3 | PrM-Q4 | 30 | 115 | 2.2  | 1.9  | 0.8 granite   |
| 2419 | PrM-21-Q4-T3 | PrM-Q4 | 30 | 116 | 2.5  | 1.4  | 1.2 granite   |
| 2420 | PrM-21-Q4-T3 | PrM-Q4 | 30 | 117 | 1.8  | 1.2  | 0.7 volcanic  |
| 2421 | PrM-21-Q4-T3 | PrM-Q4 | 30 | 118 | 6.2  | 4.0  | 3.5 volcanic  |
| 2422 | PrM-21-Q4-T3 | PrM-Q4 | 30 | 119 | 3.2  | 3.0  | 1.5 volcanic  |
| 2423 | PrM-21-Q4-T3 | PrM-Q4 | 30 | 120 | 1.5  | 1.5  | 0.2 volcanic  |
| 2424 | PrM-21-Q4-T3 | PrM-Q4 | 30 | 121 | 1.6  | 1.2  | 0.7 volcanic  |
| 2425 | PrM-21-Q4-T3 | PrM-Q4 | 30 | 122 | 2.4  | 1.9  | 0.7 volcanic  |
| 2426 | PrM-21-Q4-T3 | PrM-Q4 | 30 | 123 | 3.3  | 1.5  | 0.7 volcanic  |
| 2427 | PrM-21-Q4-T3 | PrM-Q4 | 30 | 124 | 1.8  | 1.2  | 0.6 volcanic  |
| 2428 | PrM-21-Q4-T3 | PrM-Q4 | 30 | 125 | 2.3  | 1.3  | 1.0 volcanic  |
| 2429 | PrM-21-Q4-T3 | PrM-Q4 | 30 | 126 | 1.7  | 1.4  | 1.1 volcanic  |
| 2430 | PrM-21-Q4-T3 | PrM-Q4 | 30 | 127 | 2.0  | 1.7  | 1.0 volcanic  |
| 2431 | PrM-21-Q4-T3 | PrM-Q4 | 30 | 128 | 3.0  | 1.2  | 0.9 volcanic  |
| 2432 | PrM-21-Q4-T3 | PrM-Q4 | 30 | 129 | 20.0 | 16.5 | 11.0 volcanic |
| 2433 | PrM-21-Q4-T3 | PrM-Q4 | 30 | 130 | 5.0  | 2.5  | 3.0 volcanic  |
| 2434 | PrM-21-Q4-T3 | PrM-Q4 | 30 | 131 | 2.8  | 2.0  | 1.5 volcanic  |
| 2435 | PrM-21-Q4-T3 | PrM-Q4 | 30 | 132 | 24.5 | 11.5 | 11.5 volcanic |
| 2436 | PrM-21-Q4-T3 | PrM-Q4 | 30 | 133 | 3.2  | 2.7  | 1.5 volcanic  |
| 2437 | PrM-21-Q4-T3 | PrM-Q4 | 30 | 134 | 1.7  | 1.3  | 1.0 carbonate |
| 2438 | PrM-21-Q4-T3 | PrM-Q4 | 30 | 135 | 5.0  | 2.6  | 2.0 carbonate |
| 2439 | PrM-21-Q4-T3 | PrM-Q4 | 30 | 136 | 3.6  | 3.3  | 1.2 carbonate |
| 2440 | PrM-21-Q4-T3 | PrM-Q4 | 30 | 137 | 7.5  | 3.1  | 2.0 carbonate |
| 2441 | PrM-21-Q4-T3 | PrM-Q4 | 30 | 138 | 8.0  | 6.0  | 3.2 carbonate |

|      |              |        |    |     |      |     |     |           |
|------|--------------|--------|----|-----|------|-----|-----|-----------|
| 2442 | PrM-21-Q4-T3 | PrM-Q4 | 30 | 139 | 2.8  | 1.1 | 1.0 | carbonate |
| 2443 | PrM-21-Q4-T3 | PrM-Q4 | 30 | 140 | 4.1  | 2.3 | 1.5 | carbonate |
| 2444 | PrM-21-Q4-T3 | PrM-Q4 | 30 | 141 | 1.8  | 1.2 | 0.6 | carbonate |
| 2445 | PrM-21-Q4-T3 | PrM-Q4 | 30 | 142 | 7.5  | 5.2 | 4.0 | carbonate |
| 2446 | PrM-21-Q4-T3 | PrM-Q4 | 30 | 143 | 1.5  | 1.5 | 0.6 | carbonate |
| 2447 | PrM-21-Q4-T3 | PrM-Q4 | 30 | 144 | 7.0  | 5.5 | 2.0 | carbonate |
| 2448 | PrM-21-Q4-T3 | PrM-Q4 | 30 | 145 | 2.8  | 2.2 | 2.0 | carbonate |
| 2449 | PrM-21-Q4-T3 | PrM-Q4 | 30 | 146 | 2.2  | 2.0 | 1.8 | carbonate |
| 2450 | PrM-21-Q3-T1 | PrM-Q3 | 70 | 1   | 2.3  | 1.7 | 1.2 | granite   |
| 2451 | PrM-21-Q3-T1 | PrM-Q3 | 70 | 2   | 2.5  | 2.0 | 0.8 | granite   |
| 2452 | PrM-21-Q3-T1 | PrM-Q3 | 70 | 3   | 1.6  | 1.1 | 1.0 | granite   |
| 2453 | PrM-21-Q3-T1 | PrM-Q3 | 70 | 4   | 2.0  | 1.3 | 0.7 | granite   |
| 2454 | PrM-21-Q3-T1 | PrM-Q3 | 70 | 5   | 4.5  | 3.8 | 2.2 | granite   |
| 2455 | PrM-21-Q3-T1 | PrM-Q3 | 70 | 6   | 1.6  | 1.1 | 0.8 | granite   |
| 2456 | PrM-21-Q3-T1 | PrM-Q3 | 70 | 7   | 1.8  | 1.1 | 1.1 | granite   |
| 2457 | PrM-21-Q3-T1 | PrM-Q3 | 70 | 8   | 2.5  | 1.2 | 0.4 | granite   |
| 2458 | PrM-21-Q3-T1 | PrM-Q3 | 70 | 9   | 1.8  | 1.2 | 1.1 | granite   |
| 2459 | PrM-21-Q3-T1 | PrM-Q3 | 70 | 10  | 5.2  | 3.0 | 2.3 | granite   |
| 2460 | PrM-21-Q3-T1 | PrM-Q3 | 70 | 11  | 2.3  | 1.7 | 1.1 | granite   |
| 2461 | PrM-21-Q3-T1 | PrM-Q3 | 70 | 12  | 2.3  | 1.8 | 0.9 | granite   |
| 2462 | PrM-21-Q3-T1 | PrM-Q3 | 70 | 13  | 5.5  | 4.0 | 2.5 | granite   |
| 2463 | PrM-21-Q3-T1 | PrM-Q3 | 70 | 14  | 1.7  | 1.5 | 0.8 | granite   |
| 2464 | PrM-21-Q3-T1 | PrM-Q3 | 70 | 15  | 3.3  | 2.0 | 1.5 | granite   |
| 2465 | PrM-21-Q3-T1 | PrM-Q3 | 70 | 16  | 1.5  | 1.3 | 0.7 | granite   |
| 2466 | PrM-21-Q3-T1 | PrM-Q3 | 70 | 17  | 2.3  | 1.0 | 0.8 | granite   |
| 2467 | PrM-21-Q3-T1 | PrM-Q3 | 70 | 18  | 2.0  | 1.3 | 1.0 | granite   |
| 2468 | PrM-21-Q3-T1 | PrM-Q3 | 70 | 19  | 1.7  | 1.4 | 1.0 | granite   |
| 2469 | PrM-21-Q3-T1 | PrM-Q3 | 70 | 20  | 2.7  | 2.1 | 0.5 | granite   |
| 2470 | PrM-21-Q3-T1 | PrM-Q3 | 70 | 21  | 4.2  | 2.3 | 1.3 | granite   |
| 2471 | PrM-21-Q3-T1 | PrM-Q3 | 70 | 22  | 2.0  | 2.0 | 1.2 | granite   |
| 2472 | PrM-21-Q3-T1 | PrM-Q3 | 70 | 23  | 2.0  | 2.0 | 1.0 | granite   |
| 2473 | PrM-21-Q3-T1 | PrM-Q3 | 70 | 24  | 1.7  | 1.4 | 0.6 | granite   |
| 2474 | PrM-21-Q3-T1 | PrM-Q3 | 70 | 25  | 2.2  | 1.7 | 1.0 | granite   |
| 2475 | PrM-21-Q3-T1 | PrM-Q3 | 70 | 26  | 1.6  | 1.3 | 0.9 | granite   |
| 2476 | PrM-21-Q3-T1 | PrM-Q3 | 70 | 27  | 1.5  | 1.5 | 0.6 | granite   |
| 2477 | PrM-21-Q3-T1 | PrM-Q3 | 70 | 28  | 2.3  | 1.0 | 0.7 | granite   |
| 2478 | PrM-21-Q3-T1 | PrM-Q3 | 70 | 29  | 2.1  | 1.1 | 1.0 | granite   |
| 2479 | PrM-21-Q3-T1 | PrM-Q3 | 70 | 30  | 4.2  | 2.7 | 1.5 | granite   |
| 2480 | PrM-21-Q3-T1 | PrM-Q3 | 70 | 31  | 1.5  | 1.2 | 0.9 | volcanic  |
| 2481 | PrM-21-Q3-T1 | PrM-Q3 | 70 | 32  | 1.3  | 1.2 | 0.8 | volcanic  |
| 2482 | PrM-21-Q3-T1 | PrM-Q3 | 70 | 33  | 1.4  | 1.0 | 0.9 | volcanic  |
| 2483 | PrM-21-Q3-T1 | PrM-Q3 | 70 | 34  | 2.0  | 1.4 | 0.8 | volcanic  |
| 2484 | PrM-21-Q3-T1 | PrM-Q3 | 70 | 35  | 6.1  | 4.0 | 2.5 | volcanic  |
| 2485 | PrM-21-Q3-T1 | PrM-Q3 | 70 | 36  | 2.8  | 1.5 | 0.7 | volcanic  |
| 2486 | PrM-21-Q3-T1 | PrM-Q3 | 70 | 37  | 2.5  | 1.6 | 1.3 | volcanic  |
| 2487 | PrM-21-Q3-T1 | PrM-Q3 | 70 | 38  | 2.2  | 1.7 | 0.9 | volcanic  |
| 2488 | PrM-21-Q3-T1 | PrM-Q3 | 70 | 39  | 10.2 | 6.5 | 0.8 | volcanic  |

|      |              |        |    |    |      |      |               |
|------|--------------|--------|----|----|------|------|---------------|
| 2489 | PrM-21-Q3-T1 | PrM-Q3 | 70 | 40 | 12.5 | 9.0  | 5.5 volcanic  |
| 2490 | PrM-21-Q3-T1 | PrM-Q3 | 70 | 41 | 8.8  | 7.2  | 0.8 volcanic  |
| 2491 | PrM-21-Q3-T1 | PrM-Q3 | 70 | 42 | 1.6  | 1.5  | 1.0 volcanic  |
| 2492 | PrM-21-Q3-T1 | PrM-Q3 | 70 | 43 | 1.5  | 1.2  | 1.0 volcanic  |
| 2493 | PrM-21-Q3-T1 | PrM-Q3 | 70 | 44 | 1.8  | 1.6  | 0.8 volcanic  |
| 2494 | PrM-21-Q3-T1 | PrM-Q3 | 70 | 45 | 15.0 | 6.5  | 5.5 volcanic  |
| 2495 | PrM-21-Q3-T1 | PrM-Q3 | 70 | 46 | 1.3  | 1.3  | 1.0 volcanic  |
| 2496 | PrM-21-Q3-T1 | PrM-Q3 | 70 | 47 | 2.1  | 1.3  | 0.6 volcanic  |
| 2497 | PrM-21-Q3-T1 | PrM-Q3 | 70 | 48 | 2.2  | 1.5  | 1.3 volcanic  |
| 2498 | PrM-21-Q3-T1 | PrM-Q3 | 70 | 49 | 8.8  | 7.5  | 6.2 volcanic  |
| 2499 | PrM-21-Q3-T1 | PrM-Q3 | 70 | 50 | 1.6  | 1.4  | 1.0 volcanic  |
| 2500 | PrM-21-Q3-T1 | PrM-Q3 | 70 | 51 | 2.0  | 1.2  | 0.8 volcanic  |
| 2501 | PrM-21-Q3-T1 | PrM-Q3 | 70 | 52 | 21.5 | 10.0 | 7.5 volcanic  |
| 2502 | PrM-21-Q3-T1 | PrM-Q3 | 70 | 53 | 5.8  | 3.5  | 1.5 volcanic  |
| 2503 | PrM-21-Q3-T1 | PrM-Q3 | 70 | 54 | 2.0  | 1.1  | 0.6 volcanic  |
| 2504 | PrM-21-Q3-T1 | PrM-Q3 | 70 | 55 | 3.2  | 2.8  | 1.8 volcanic  |
| 2505 | PrM-21-Q3-T1 | PrM-Q3 | 70 | 56 | 1.2  | 1.1  | 1.0 volcanic  |
| 2506 | PrM-21-Q3-T1 | PrM-Q3 | 70 | 57 | 4.1  | 1.2  | 0.6 volcanic  |
| 2507 | PrM-21-Q3-T1 | PrM-Q3 | 70 | 58 | 1.8  | 1.5  | 0.7 volcanic  |
| 2508 | PrM-21-Q3-T1 | PrM-Q3 | 70 | 59 | 14.0 | 10.8 | 7.0 volcanic  |
| 2509 | PrM-21-Q3-T1 | PrM-Q3 | 70 | 60 | 9.5  | 4.6  | 3.8 volcanic  |
| 2510 | PrM-21-Q3-T1 | PrM-Q3 | 70 | 61 | 7.5  | 6.2  | 4.0 volcanic  |
| 2511 | PrM-21-Q3-T1 | PrM-Q3 | 70 | 62 | 2.2  | 1.1  | 1.0 carbonate |
| 2512 | PrM-21-Q3-T1 | PrM-Q3 | 70 | 63 | 3.5  | 2.4  | 2.0 carbonate |
| 2513 | PrM-21-Q3-T1 | PrM-Q3 | 70 | 64 | 1.7  | 1.3  | 1.1 carbonate |
| 2514 | PrM-21-Q3-T3 | PrM-Q3 | 70 | 65 | 1.2  | 1.0  | 0.7 granite   |
| 2515 | PrM-21-Q3-T3 | PrM-Q3 | 70 | 66 | 4.2  | 3.7  | 1.5 granite   |
| 2516 | PrM-21-Q3-T3 | PrM-Q3 | 70 | 67 | 1.5  | 1.5  | 1.2 granite   |
| 2517 | PrM-21-Q3-T3 | PrM-Q3 | 70 | 68 | 2.2  | 1.1  | 0.8 granite   |
| 2518 | PrM-21-Q3-T3 | PrM-Q3 | 70 | 69 | 1.6  | 1.2  | 0.7 granite   |
| 2519 | PrM-21-Q3-T3 | PrM-Q3 | 70 | 70 | 2.3  | 1.6  | 1.2 granite   |
| 2520 | PrM-21-Q3-T3 | PrM-Q3 | 70 | 71 | 1.1  | 1.2  | 1.0 granite   |
| 2521 | PrM-21-Q3-T3 | PrM-Q3 | 70 | 72 | 2.0  | 1.3  | 1.1 granite   |
| 2522 | PrM-21-Q3-T3 | PrM-Q3 | 70 | 73 | 2.6  | 1.8  | 1.0 granite   |
| 2523 | PrM-21-Q3-T3 | PrM-Q3 | 70 | 74 | 1.7  | 1.2  | 0.9 granite   |
| 2524 | PrM-21-Q3-T3 | PrM-Q3 | 70 | 75 | 3.7  | 3.2  | 2.0 granite   |
| 2525 | PrM-21-Q3-T3 | PrM-Q3 | 70 | 76 | 1.5  | 1.1  | 0.9 granite   |
| 2526 | PrM-21-Q3-T3 | PrM-Q3 | 70 | 77 | 1.7  | 1.5  | 0.7 granite   |
| 2527 | PrM-21-Q3-T3 | PrM-Q3 | 70 | 78 | 6.3  | 4.2  | 3.2 granite   |
| 2528 | PrM-21-Q3-T3 | PrM-Q3 | 70 | 79 | 1.6  | 1.0  | 0.7 granite   |
| 2529 | PrM-21-Q3-T3 | PrM-Q3 | 70 | 80 | 2.8  | 2.0  | 1.6 granite   |
| 2530 | PrM-21-Q3-T3 | PrM-Q3 | 70 | 81 | 5.7  | 4.2  | 2.8 granite   |
| 2531 | PrM-21-Q3-T3 | PrM-Q3 | 70 | 82 | 1.6  | 1.1  | 1.0 granite   |
| 2532 | PrM-21-Q3-T3 | PrM-Q3 | 70 | 83 | 1.9  | 1.8  | 0.6 granite   |
| 2533 | PrM-21-Q3-T3 | PrM-Q3 | 70 | 84 | 2.1  | 1.7  | 1.1 granite   |
| 2534 | PrM-21-Q3-T3 | PrM-Q3 | 70 | 85 | 1.2  | 1.2  | 0.7 granite   |
| 2535 | PrM-21-Q3-T3 | PrM-Q3 | 70 | 86 | 3.7  | 2.8  | 1.2 granite   |

|      |              |        |    |     |      |      |              |
|------|--------------|--------|----|-----|------|------|--------------|
| 2536 | PrM-21-Q3-T3 | PrM-Q3 | 70 | 87  | 2.0  | 1.7  | 0.5 granite  |
| 2537 | PrM-21-Q3-T3 | PrM-Q3 | 70 | 88  | 5.0  | 3.0  | 1.8 granite  |
| 2538 | PrM-21-Q3-T3 | PrM-Q3 | 70 | 89  | 6.2  | 4.2  | 3.1 granite  |
| 2539 | PrM-21-Q3-T3 | PrM-Q3 | 70 | 90  | 3.2  | 2.3  | 1.8 granite  |
| 2540 | PrM-21-Q3-T3 | PrM-Q3 | 70 | 91  | 1.6  | 1.1  | 0.5 granite  |
| 2541 | PrM-21-Q3-T3 | PrM-Q3 | 70 | 92  | 1.6  | 1.2  | 0.7 granite  |
| 2542 | PrM-21-Q3-T3 | PrM-Q3 | 70 | 93  | 2.0  | 1.3  | 1.2 granite  |
| 2543 | PrM-21-Q3-T3 | PrM-Q3 | 70 | 94  | 1.2  | 1.0  | 0.8 granite  |
| 2544 | PrM-21-Q3-T3 | PrM-Q3 | 70 | 95  | 1.5  | 1.2  | 1.2 granite  |
| 2545 | PrM-21-Q3-T3 | PrM-Q3 | 70 | 96  | 1.4  | 1.4  | 0.9 granite  |
| 2546 | PrM-21-Q3-T3 | PrM-Q3 | 70 | 97  | 2.5  | 2.2  | 1.2 granite  |
| 2547 | PrM-21-Q3-T3 | PrM-Q3 | 70 | 98  | 2.3  | 1.8  | 1.5 granite  |
| 2548 | PrM-21-Q3-T3 | PrM-Q3 | 70 | 99  | 2.3  | 1.8  | 1.4 volcanic |
| 2549 | PrM-21-Q3-T3 | PrM-Q3 | 70 | 100 | 7.3  | 4.1  | 1.5 volcanic |
| 2550 | PrM-21-Q3-T3 | PrM-Q3 | 70 | 101 | 2.3  | 1.9  | 1.8 volcanic |
| 2551 | PrM-21-Q3-T3 | PrM-Q3 | 70 | 102 | 3.2  | 2.3  | 1.8 volcanic |
| 2552 | PrM-21-Q3-T3 | PrM-Q3 | 70 | 103 | 2.2  | 1.5  | 1.0 volcanic |
| 2553 | PrM-21-Q3-T3 | PrM-Q3 | 70 | 104 | 3.2  | 2.3  | 1.1 volcanic |
| 2554 | PrM-21-Q3-T3 | PrM-Q3 | 70 | 105 | 3.0  | 1.4  | 0.9 volcanic |
| 2555 | PrM-21-Q3-T3 | PrM-Q3 | 70 | 106 | 3.2  | 2.1  | 1.0 volcanic |
| 2556 | PrM-21-Q3-T3 | PrM-Q3 | 70 | 107 | 7.2  | 5.5  | 5.0 volcanic |
| 2557 | PrM-21-Q3-T3 | PrM-Q3 | 70 | 108 | 1.7  | 1.4  | 0.8 volcanic |
| 2558 | PrM-21-Q3-T3 | PrM-Q3 | 70 | 109 | 14.0 | 10.5 | 2.5 volcanic |
| 2559 | PrM-21-Q3-T3 | PrM-Q3 | 70 | 110 | 2.3  | 1.6  | 0.8 volcanic |
| 2560 | PrM-21-Q3-T3 | PrM-Q3 | 70 | 111 | 1.6  | 1.2  | 1.0 volcanic |
| 2561 | PrM-21-Q3-T3 | PrM-Q3 | 70 | 112 | 3.8  | 2.6  | 2.1 volcanic |
| 2562 | PrM-21-Q3-T3 | PrM-Q3 | 70 | 113 | 2.6  | 2.0  | 1.0 volcanic |
| 2563 | PrM-21-Q3-T3 | PrM-Q3 | 70 | 114 | 2.5  | 1.5  | 0.7 volcanic |
| 2564 | PrM-21-Q3-T3 | PrM-Q3 | 70 | 115 | 2.6  | 2.0  | 0.5 volcanic |
| 2565 | PrM-21-Q3-T3 | PrM-Q3 | 70 | 116 | 1.8  | 1.2  | 0.9 volcanic |
| 2566 | PrM-21-Q3-T3 | PrM-Q3 | 70 | 117 | 1.4  | 1.2  | 0.7 volcanic |
| 2567 | PrM-21-Q3-T3 | PrM-Q3 | 70 | 118 | 8.7  | 4.7  | 4.5 volcanic |
| 2568 | PrM-21-Q3-T3 | PrM-Q3 | 70 | 119 | 5.5  | 3.0  | 2.8 volcanic |
| 2569 | PrM-21-Q3-T3 | PrM-Q3 | 70 | 120 | 2.9  | 1.8  | 1.3 volcanic |
| 2570 | PrM-21-Q3-T3 | PrM-Q3 | 70 | 121 | 1.8  | 1.7  | 0.8 volcanic |
| 2571 | PrM-21-Q3-T3 | PrM-Q3 | 70 | 122 | 2.2  | 1.2  | 0.5 volcanic |
| 2572 | PrM-21-Q3-T3 | PrM-Q3 | 70 | 123 | 9.2  | 6.5  | 4.5 volcanic |
| 2573 | PrM-21-Q3-T3 | PrM-Q3 | 70 | 124 | 9.7  | 6.5  | 3.0 volcanic |
| 2574 | PrM-21-Q3-T3 | PrM-Q3 | 70 | 125 | 3.3  | 1.8  | 1.1 volcanic |
| 2575 | PrM-21-Q3-T3 | PrM-Q3 | 70 | 126 | 1.7  | 1.2  | 0.8 volcanic |
| 2576 | PrM-21-Q3-T3 | PrM-Q3 | 70 | 127 | 5.2  | 3.8  | 2.5 volcanic |
| 2577 | PrM-21-Q3-T3 | PrM-Q3 | 70 | 128 | 7.6  | 6.7  | 3.0 volcanic |
| 2578 | PrM-21-Q3-T3 | PrM-Q3 | 70 | 129 | 5.8  | 4.0  | 1.1 volcanic |
| 2579 | PrM-21-Q3-T3 | PrM-Q3 | 70 | 130 | 7.2  | 2.6  | 2.0 volcanic |
| 2580 | PrM-21-Q3-T3 | PrM-Q3 | 70 | 131 | 5.2  | 4.2  | 0.9 volcanic |
| 2581 | PrM-21-Q3-T3 | PrM-Q3 | 70 | 132 | 2.5  | 1.8  | 0.8 volcanic |
| 2582 | PrM-21-Q3-T3 | PrM-Q3 | 70 | 133 | 1.8  | 1.3  | 1.3 volcanic |

|      |              |        |    |     |      |      |               |
|------|--------------|--------|----|-----|------|------|---------------|
| 2583 | PrM-21-Q3-T3 | PrM-Q3 | 70 | 134 | 5.2  | 5.0  | 3.3 volcanic  |
| 2584 | PrM-21-Q3-T3 | PrM-Q3 | 70 | 135 | 1.5  | 1.2  | 0.9 volcanic  |
| 2585 | PrM-21-Q3-T3 | PrM-Q3 | 70 | 136 | 1.6  | 1.2  | 0.3 carbonate |
| 2586 | PrM-21-Q3-T3 | PrM-Q3 | 70 | 137 | 2.8  | 1.8  | 0.7 carbonate |
| 2587 | PrM-21-Q3-T3 | PrM-Q3 | 70 | 138 | 4.1  | 3.2  | 0.4 carbonate |
| 2588 | PrM-21-Q3-T3 | PrM-Q3 | 70 | 139 | 1.8  | 1.1  | 0.7 carbonate |
| 2589 | PrM-21-Q3-T3 | PrM-Q3 | 70 | 140 | 14.0 | 5.8  | 2.2 carbonate |
| 2590 | PrM-21-Q3-T3 | PrM-Q3 | 70 | 141 | 1.7  | 1.0  | 0.6 carbonate |
| 2591 | PrM-21-Q3-T3 | PrM-Q3 | 70 | 142 | 3.6  | 2.2  | 1.3 carbonate |
| 2592 | PrM-21-Q3-T3 | PrM-Q3 | 70 | 143 | 1.5  | 1.0  | 0.2 carbonate |
| 2593 | PrM-21-Q3-T3 | PrM-Q3 | 70 | 144 | 1.5  | 1.0  | 0.8 carbonate |
| 2594 | PrM-21-Q3-T3 | PrM-Q3 | 70 | 145 | 5.1  | 3.2  | 1.5 carbonate |
| 2595 | PrM-21-Q3-T3 | PrM-Q3 | 70 | 146 | 1.1  | 1.0  | 0.2 carbonate |
| 2596 | PrM-21-Q3-T3 | PrM-Q3 | 70 | 147 | 2.1  | 1.3  | 0.7 carbonate |
| 2597 | PrM-21-Q3-T3 | PrM-Q3 | 70 | 148 | 5.6  | 2.0  | 1.1 carbonate |
| 2598 | PrM-21-Q3-T3 | PrM-Q3 | 70 | 149 | 2.8  | 1.0  | 0.5 carbonate |
| 2599 | PrM-21-Q3-T3 | PrM-Q3 | 70 | 150 | 2.2  | 2.0  | 0.3 carbonate |
| 2600 | PrM-21-Q3-T3 | PrM-Q3 | 70 | 151 | 1.5  | 1.0  | 1.0 carbonate |
| 2601 | PrM-21-Q3-T3 | PrM-Q3 | 70 | 152 | 17.2 | 12.5 | 4.0 carbonate |
| 2602 | PrM-21-Q3-T3 | PrM-Q3 | 70 | 153 | 2.1  | 1.3  | 0.6 carbonate |
| 2603 | PrM-21-Q3-T3 | PrM-Q3 | 70 | 154 | 1.7  | 1.1  | 0.6 carbonate |
| 2604 | PrM-21-Q3-T3 | PrM-Q3 | 70 | 155 | 5.5  | 2.2  | 1.5 carbonate |

| surface name | date      | latitude<br>WGS84 BadEif unless noted | longitude    | Collected by                       | criteria/methodology                                                                                                                                                                                                                                                       | clast range | notes                                         |
|--------------|-----------|---------------------------------------|--------------|------------------------------------|----------------------------------------------------------------------------------------------------------------------------------------------------------------------------------------------------------------------------------------------------------------------------|-------------|-----------------------------------------------|
| BCTa         | 8/11/2020 | 38.2377008                            | -119.320559  | Monica Rasmussen and Warren Baker  | clast count (every rock $\geq 1\text{cm}$ , every 25cm along the transect)                                                                                                                                                                                                 | 11901-12000 | bearing 277 degrees upslope                   |
| LCHT         | 8/13/2020 | 38.0314651                            | -119.1749596 | Monica Rasmussen and Warren Baker  | clast count (every rock $\geq 1\text{cm}$ , every 25cm along the transect)                                                                                                                                                                                                 | 12001-12100 | LCHT1 was a bust, bearing 245 degrees upslope |
| LCMB         | 8/10/2020 | 38.0247767                            | -119.1862647 | Monica Rasmussen and Warren Baker  | clast count (every rock $\geq 1\text{cm}$ , every 25cm along the transect)                                                                                                                                                                                                 | 11601-11635 | bearing 268 degrees upslope                   |
| LCMB         | 8/10/2020 | 38.0247361                            | -119.1860892 | Monica Rasmussen and Warren Baker  | clast count (every rock $\geq 1\text{cm}$ , every 25cm along the transect)                                                                                                                                                                                                 | 11636-11700 | bearing 260 degrees upslope                   |
| LCSH         | 8/10/2020 | 38.0204808                            | -119.1853234 | Monica Rasmussen and Warren Baker  | clast count (every rock $\geq 1\text{cm}$ , every 25cm along the transect)                                                                                                                                                                                                 | 11501-11521 | bearing 230 degrees upslope                   |
| LCSH         | 8/10/2020 | 38.0203828                            | -119.1854614 | Monica Rasmussen and Warren Baker  | clast count (every rock $\geq 1\text{cm}$ , every 25cm along the transect)                                                                                                                                                                                                 | 11522-11559 | bearing 260 degrees upslope                   |
| LCSH         | 8/10/2020 | 38.0207976                            | -119.1851913 | Monica Rasmussen and Warren Baker  | clast count (every rock $\geq 1\text{cm}$ , every 25cm along the transect)                                                                                                                                                                                                 | 11560-11600 | bearing 235 degrees upslope                   |
| LCTi         | 8/10/2020 | 38.0274272                            | -119.1756708 | Monica Rasmussen and Warren Baker  | clast count (every rock $\geq 1\text{cm}$ , every 25cm along the transect)                                                                                                                                                                                                 | 11701-11800 | bearing 290 degrees upslope                   |
| LCTiO        | 8/9/2020  | 38.0317156                            | -119.1716938 | Monica Rasmussen and Warren Baker  | clast count (every rock $\geq 1\text{cm}$ , every 25cm along the transect)                                                                                                                                                                                                 | 11401-11428 |                                               |
| LCTiO        | 8/12/2020 | 38.0316207                            | -119.1717298 | Monica Rasmussen and Warren Baker  | clast count (every rock $\geq 1\text{cm}$ , every 25cm along the transect)                                                                                                                                                                                                 | 11429-11455 | bearing 185 degrees upslope                   |
| LCTiO        | 8/12/2020 | 38.0316207                            | -119.1717298 | Monica Rasmussen and Warren Baker  | clast count (every rock $\geq 1\text{cm}$ , every 25cm along the transect)<br>clast count (every rock $\geq 1\text{cm}$ , every 25cm along the transect -- pick up three rocks at each point, one of each type granite/carbonate/volcanic)                                 | 11456-11500 | 2m east of T2                                 |
| PrM-MW       | 6/1/2021  | 34.9280776                            | -115.6045853 | Monica Rasmussen and Warren Baker  | clast count (every rock $\geq 1\text{cm}$ , every 25cm along the transect -- pick up three rocks at each point, one of each type granite/carbonate/volcanic)                                                                                                               | 1301-13073  |                                               |
| PrM-MW       | 6/1/2021  | 34.9280776                            | -115.6045853 | Monica Rasmussen and Warren Baker  | clast count (every rock $\geq 1\text{cm}$ , every 25cm -- choosing the nearest clast within ~20cm of the tape -- three rocks at each point, one of each type granite/carbonate/volcanic -- then move the tape over 0.5m and found nearest of each type every 25 cm again.) | 13074-13151 |                                               |
| PrM-Q3       | 6/25/2021 | 34.9199402                            | -115.6056725 | Monica Rasmussen and Warren Baker  | clast count (every rock $\geq 1\text{cm}$ , every 25cm along the transect -- pick up three rocks at each point, one of each type granite/carbonate/volcanic)                                                                                                               | 14001-14064 |                                               |
| PrM-Q3       | 6/27/2021 | 34.9206528                            | -115.6066998 | Monica Rasmussen and Warren Baker  | clast count (every rock $\geq 1\text{cm}$ , every 25cm along the transect -- pick up three rocks at each point, one of each type granite/carbonate/volcanic)                                                                                                               | 14065-14155 |                                               |
| PrM-Q4       | 6/20/2021 | 34.9428275                            | -115.6207590 | Monica Rasmussen and Warren Baker  | clast count (every rock $\geq 1\text{cm}$ , every 25cm along the transect -- pick up three rocks at each point, one of each type granite/carbonate/volcanic)                                                                                                               | 13801-13857 |                                               |
| PrM-Q4       | 6/21/2021 | 34.9426935                            | -115.6209209 | Monica Rasmussen and Warren Baker  | clast count (every rock $\geq 1\text{cm}$ , every 25cm along the transect -- pick up three rocks at each point, one of each type granite/carbonate/volcanic)                                                                                                               | 13858-13899 |                                               |
| PrM-Q4       | 6/22/2021 | 34.9424675                            | -115.6206198 | Monica Rasmussen and Warren Baker  | clast count (every rock $\geq 1\text{cm}$ , every 25cm along the transect -- pick up three rocks at each point, one of each type granite/carbonate/volcanic)                                                                                                               | 13900-13946 |                                               |
| PrM-Q5       | 6/17/2021 | 34.9516329                            | -115.6323552 | Monica Rasmussen and Warren Baker  | clast count (every rock $\geq 1\text{cm}$ , every 25cm along the transect -- pick up three rocks at each point, one of each type granite/carbonate/volcanic)                                                                                                               | 13401-13500 |                                               |
| PrM-Q5       | 6/18/2021 | 34.9513114                            | -115.6323719 | Monica Rasmussen and Warren Baker  | clast count (every rock $\geq 1\text{cm}$ , every 25cm along the transect -- pick up three rocks at each point, one of each type granite/carbonate/volcanic)                                                                                                               | 13501-13554 |                                               |
| PrM-Q6       | 5/30/2021 | 34.9402711                            | -115.6215290 | Monica Rasmussen and Warren Baker  | clast count (every rock $\geq 1\text{cm}$ , every 25cm along the transect -- pick up three rocks at each point, one of each type granite/carbonate/volcanic)                                                                                                               | 12801-12899 | 2775' elevation                               |
| PrM-Q6       | 5/31/2021 | 34.9400862                            | -115.6215324 | Monica Rasmussen and Warren Baker  | clast count (every rock $\geq 1\text{cm}$ , every 25cm along the transect -- pick up three rocks at each point, one of each type granite/carbonate/volcanic)                                                                                                               | 12900-12962 |                                               |
| PrM-Q7       | 6/11/2021 | 34.9443778                            | -115.6437932 | Monica Rasmussen and Warren Baker  | clast count (every rock $\geq 1\text{cm}$ , every 25cm along the transect -- pick up three rocks at each point, one of each type granite/carbonate/volcanic)                                                                                                               | 13201-13268 |                                               |
| PrM-Q7       | 6/11/2021 | 34.9602212                            | -115.635626  | Monica Rasmussen and Warren Baker  | clast count (every rock $\geq 1\text{cm}$ , every 25cm along the transect)                                                                                                                                                                                                 | 13269-13333 |                                               |
| PrM-Q4       | 8/6/2020  | 34.9438222                            | -115.6218398 | Monica Rasmussen and Sam Berberich | clast count (every rock $\geq 1\text{cm}$ , every 25cm along the transect)                                                                                                                                                                                                 | 10801-1-841 |                                               |
| PrM-Q4       | 8/6/2020  | 34.9437432                            | -115.6216533 | Monica Rasmussen and Sam Berberich | clast count (every rock $\geq 1\text{cm}$ , every 25cm along the transect)                                                                                                                                                                                                 | 10842-10869 |                                               |
| PrM-Q4       | 8/7/2020  | 34.9435981                            | -115.6214441 | Monica Rasmussen and Sam Berberich | clast count (every rock $\geq 1\text{cm}$ , every 25cm along the transect)                                                                                                                                                                                                 | 10870-10900 |                                               |
| PrM-Q5       | 8/3/2020  | 34.9518730                            | -115.6325981 | Monica Rasmussen and Sam Berberich | clast count (every rock $\geq 1\text{cm}$ , every 25cm along the transect)                                                                                                                                                                                                 | 10501-10540 |                                               |
| PrM-Q5       | 8/4/2020  | 34.9518029                            | -115.6323416 | Monica Rasmussen and Sam Berberich | clast count (every rock $\geq 1\text{cm}$ , every 25cm along the transect)                                                                                                                                                                                                 | 10542-10582 |                                               |
| PrM-Q5       | 8/4/2020  | 34.9517169                            | -115.6324390 | Monica Rasmussen and Sam Berberich | clast count (every rock $\geq 1\text{cm}$ , every 25cm along the transect)                                                                                                                                                                                                 | 10583-10601 |                                               |
| PrM-Q6       | 8/5/2020  | 34.9403049                            | -115.6215444 | Monica Rasmussen and Sam Berberich | clast count (every rock $\geq 1\text{cm}$ , every 25cm along the transect)                                                                                                                                                                                                 | 10701-10738 |                                               |
| PrM-Q6       | 8/5/2020  | 34.9402147                            | -115.6215306 | Monica Rasmussen and Sam Berberich | clast count (every rock $\geq 1\text{cm}$ , every 25cm along the transect)                                                                                                                                                                                                 | 10739-10778 |                                               |
| PrM-Q6       | 8/6/2020  | 34.9429825                            | -115.6240322 | Monica Rasmussen and Sam Berberich | clast count (every rock $\geq 1\text{cm}$ , every 25cm along the transect)                                                                                                                                                                                                 | 10779-10800 |                                               |

|        |              |            |              |                                    |                                                                                                  |             |                                                                            |
|--------|--------------|------------|--------------|------------------------------------|--------------------------------------------------------------------------------------------------|-------------|----------------------------------------------------------------------------|
| PrM-Q7 | 8/2/2020     | 34.9445447 | -115.6443292 | Monica Rasmussen and Sam Berberich | clast count (every rock $\geq$ 1cm, every 25cm along the transect)                               | 10401-10500 |                                                                            |
| PrM-Q7 | 8/2/2020     | 34.9443136 | -115.6440443 | Monica Rasmussen and Sam Berberich | clast count (every rock $\geq$ 1cm, every 25cm along the transect)                               | 10441-10471 |                                                                            |
| PrM-Q7 | 8/3/2020     | 34.9446783 | -115.6446272 | Monica Rasmussen and Sam Berberich | clast count (every rock $\geq$ 1cm, every 25cm along the transect)                               | 10472-10500 |                                                                            |
| MW     | 6/20/2020    | 36.7170254 | -118.2432726 | Monica Rasmussen and Warren Baker  | clast count (every rock $\geq$ 1cm, every 25cm along the transect)                               | 9001-9074   |                                                                            |
| MW     | 6/20/2020    | 36.7169771 | -118.2431475 | Monica Rasmussen and Warren Baker  | clast count (every rock $\geq$ 1cm, every 25cm along the transect)                               | 9075-9100   |                                                                            |
| Q1     | 7/29/2020    | 36.7090665 | -118.2588876 | Monica Rasmussen and Sam Berberich | At multiple sites from spring break. Every clast $\geq$ 1cm, every meter, in a grid at each site | 10201-10300 | Q1-5-T1 at 36.7097089N, -118.2580962W, Q1-2-T1 at 36.7109145, -118.2564597 |
| Q2a    | 7/21/2020    | 36.7303971 | -118.2556489 | Monica Rasmussen and Sam Berberich | Clast count (every rock $\geq$ 1cm, every 1m in a 3x4m grid)                                     | 10101-10117 | Sediment was collected along same grid                                     |
|        | 7/21/2020 // |            |              |                                    |                                                                                                  |             |                                                                            |
| Q2a    | 7/23/2020    | 36.7303047 | -118.2557906 | Monica Rasmussen and Sam Berberich | Clast count (every rock $\geq$ 1cm, every 1m in a 3x4m grid)                                     | 10118-10155 | Sediment was collected along same grid                                     |
| Q2a    | 7/26/2020    | 36.7264038 | -118.2626735 | Monica Rasmussen and Sam Berberich | clast count (every rock $\geq$ 1cm, every 25cm along the transect)                               | 10156-10200 |                                                                            |
| Q2c    | 7/8/2020     | 36.7278992 | -118.2533277 | Monica Rasmussen and Sam Berberich | clast count (every rock $\geq$ 1cm, every 25cm along the transect)                               | 9601-9700   |                                                                            |
|        | 6/25/2020 // |            |              |                                    |                                                                                                  |             |                                                                            |
| Q3     | 6/26/2020    | 36.7218734 | -118.2516369 | Monica Rasmussen and Sam Berberich | clast count (every rock $\geq$ 1cm, every 25cm along the transect)                               | 9501-9524   |                                                                            |
| Q3     | 6/27/2020    | 36.7218874 | -118.2516930 | Monica Rasmussen and Sam Berberich | clast count (every rock $\geq$ 1cm, every 25cm along the transect)                               | 9525-9556   |                                                                            |
|        | 6/27/2020 // |            |              |                                    |                                                                                                  |             |                                                                            |
| Q3     | 6/29/2020    | 36.7219934 | -118.2528031 | Monica Rasmussen and Sam Berberich | clast count (every rock $\geq$ 1cm, every 25cm along the transect)                               | 9557-9600   |                                                                            |
| Q4     |              |            |              |                                    |                                                                                                  | 9301-9400   |                                                                            |
| Q4     | 7/17/2020    | 36.7202365 | -118.2145496 | Monica Rasmussen and Sam Berberich | clast count (every rock $\geq$ 1cm, every 25cm along the transect)                               | 10001-10100 |                                                                            |
