# Supplementary material for: What doesn’t break rock makes it tougher
Source: Research Square preprint supplement (doi:10.21203/rs.3.rs-3198792/v1), 2023-10-23
Supplement: Supplementary file 2 [file 7a30114c803bd276a9262912.pdf]

| <b>Site</b>               | <b>Surface</b> | <b>Surface age (kyr)</b> | <b>Laboratory core sample ID</b> | <b>Dynamic Young's modulus (GPa) calculated from Vp, Vs, density</b> |
|---------------------------|----------------|--------------------------|----------------------------------|----------------------------------------------------------------------|
| Middle-Shepherd Creek     | Q1             | 117                      | EP1-C01                          | 16.14                                                                |
| Middle-Shepherd Creek     | Q1             | 117                      | EP1-C02                          | 19.08                                                                |
| Middle-Shepherd Creek     | Q2a            | 77                       | EP2-C01                          | 19.89                                                                |
| Middle-Shepherd Creek     | Q2a            | 77                       | EP2-C02                          | 18.87                                                                |
| Middle-Shepherd Creek     | Q2a            | 77                       | EP2-C03                          | 24.29                                                                |
| Middle-Shepherd Creek     | Q2a            | 77                       | EP2-C04                          | 28.69                                                                |
| Middle-Shepherd Creek     | Q2a            | 77                       | EP2-C05                          | 25.05                                                                |
| Middle-Shepherd Creek     | Q2c            | 33                       | EP3-C01                          | 28.77                                                                |
| Middle-Shepherd Creek     | Q2c            | 33                       | EP3-C02                          | 33.62                                                                |
| Middle-Shepherd Creek     | Q2c            | 33                       | EP3-C03                          | 25.57                                                                |
| Middle-Shepherd Creek     | Q2c            | 33                       | EP3-C04                          | 29.64                                                                |
| Middle-Shepherd Creek     | Q2c            | 33                       | EP3-C05                          | 30.05                                                                |
| Middle-Shepherd Creek     | Q2c            | 33                       | EP3-C06                          | 28.88                                                                |
| Middle-Shepherd Creek     | Q2c            | 33                       | EP3-C07                          | 27.42                                                                |
| Middle-Shepherd Creek     | Q2c            | 33                       | EP3-C08                          | 26.71                                                                |
| Middle-Shepherd Creek     | Q3             | 21                       | EP4-C02                          | 21.05                                                                |
| Middle-Shepherd Creek     | Q4             | 6                        | EP5-C01                          | 40.71                                                                |
| Middle-Shepherd Creek     | Q4             | 6                        | EP5-C02                          | 45.85                                                                |
| Middle-Shepherd Creek     | Q4             | 6                        | EP5-C03                          | 41.78                                                                |
| Middle-Shepherd Creek     | Q4             | 6                        | EP5-C04                          | 40.99                                                                |
| Middle-Shepherd Creek     | Q4             | 6                        | EP5-C05                          | 44.42                                                                |
| Middle-Shepherd Creek     | Q4             | 6                        | EP5-C06                          | 41.34                                                                |
| Middle-Shepherd Creek     | MW             | 0                        | EP7-C10                          | 31.08                                                                |
| Middle-Shepherd Creek     | MW             | 0                        | EP7-C11                          | 34.11                                                                |
| Middle-Shepherd Creek     | MW             | 0                        | EP7-C4                           | 32.73                                                                |
| Middle-Shepherd Creek     | MW             | 0                        | EP7-C5                           | 35.69                                                                |
| Middle-Shepherd Creek     | MW             | 0                        | EP6-C01                          | 14.80                                                                |
| Middle-Shepherd Creek     | MW             | 0                        | EP6-C02                          | 14.09                                                                |
| Middle-Shepherd Creek     | MW             | 0                        | EP6-C03                          | 12.11                                                                |
| Middle-Shepherd Creek     | MW             | 0                        | EP6-C04                          | 12.92                                                                |
| Middle-Shepherd Creek     | MW             | 0                        | EP6-C05                          | 17.04                                                                |
| Middle-Shepherd Creek     | MW             | 0                        | EP6-C06                          | 15.90                                                                |
| Middle-Shepherd Creek     | MW             | 0                        | EP6-C07                          | 14.95                                                                |
| Northernmost-Lundy Canyon | Tce            | 15                       | LC1-C1                           | 54.01                                                                |
| Northernmost-Lundy Canyon | Tce            | 15                       | LC1-C2                           | 49.75                                                                |
| Northernmost-Lundy Canyon | Tce            | 15                       | LC1-C3                           | 47.79                                                                |
| Northernmost-Lundy Canyon | Tce            | 15                       | LC1-C4                           | 47.34                                                                |
| Northernmost-Lundy Canyon | LCTiO          | 18                       | LC2-1C                           | 49.72                                                                |
| Northernmost-Lundy Canyon | LCTiO          | 18                       | LC2-1C                           | 46.18                                                                |
| Northernmost-Lundy Canyon | LCTiO          | 18                       | LC2-2C                           | 26.65                                                                |
| Northernmost-Lundy Canyon | LCTiO          | 18                       | LC2-2C                           | 35.63                                                                |
| Northernmost-Lundy Canyon | LCTiO          | 18                       | LC2-3C                           | 51.64                                                                |
| Northernmost-Lundy Canyon | LCTiO          | 18                       | LC2-4C                           | 53.95                                                                |
| Northernmost-Lundy Canyon | LCTiO          | 18                       | LC2-5C                           | 48.33                                                                |

|                           |       |     |        |       |
|---------------------------|-------|-----|--------|-------|
| Northernmost-Lundy Canyon | LCTiO | 18  | LC2-6C | 51.67 |
| Northernmost-Lundy Canyon | LCTiO | 18  | LC2-8C | 55.56 |
| Northernmost-Lundy Canyon | LCTiO | 18  | LC2-9C | 51.11 |
| Northernmost-Lundy Canyon | LCTiO | 18  | LC2-9C | 45.27 |
| Northernmost-Lundy Canyon | MW    | 0   | LC3-1C | 53.45 |
| Northernmost-Lundy Canyon | MW    | 0   | LC3-3C | 68.32 |
| Northernmost-Lundy Canyon | MW    | 0   | LC3-4C | 76.77 |
| Northernmost-Lundy Canyon | MW    | 0   | LC3-6C | 44.14 |
| Northernmost-Lundy Canyon | MW    | 0   | LC3-6C | 75.06 |
| Northernmost-Lundy Canyon | MW    | 0   | LC3-8C | 65.21 |
| Northernmost-Lundy Canyon | MW    | 0   | LC3-9C | 78.66 |
| Northernmost-Lundy Canyon | BCTa  | 148 | LC4-C1 | 25.43 |
| Northernmost-Lundy Canyon | BCTa  | 148 | LC4-C2 | 29.55 |
| Northernmost-Lundy Canyon | BCTa  | 148 | LC4-C2 | 38.85 |
